# Supplementary material for: Rabies in Southeast Asia: a systematic review of its incidence, risk factors and mortality
Source: PubMed Central journal article supplement — BMJ Open. 2023 May 10;13(5):e066587. doi: 10.1136/bmjopen-2022-066587 (PMC10173986; doi:10.1136/bmjopen-2022-066587), 2023-05-10
Supplement: bmjopen-2022-066587.draft_revisions.pdf [file bmjopen-2022-066587.draft_revisions.pdf]

# BMJ Open

BMJ Open is committed to open peer review. As part of this commitment we make the peer review history of every article we publish publicly available.

When an article is published we post the peer reviewers' comments and the authors' responses online. We also post the versions of the paper that were used during peer review. These are the versions that the peer review comments apply to.

The versions of the paper that follow are the versions that were submitted during the peer review process. They are not the versions of record or the final published versions. They should not be cited or distributed as the published version of this manuscript.

BMJ Open is an open access journal and the full, final, typeset and author-corrected version of record of the manuscript is available on our site with no access controls, subscription charges or pay-per-view fees (<http://bmjopen.bmj.com>).

If you have any questions on BMJ Open's open peer review process please email [info.bmjopen@bmj.com](mailto:info.bmjopen@bmj.com)

# BMJ Open

## Rabies in Southeast Asia: a systematic review of its epidemiology and impact

|                               |                                                                                                                                                                                                                                                                                                                                                                                                                                                                                                                                                                                                                                                                                                                                                                                                                             |
|-------------------------------|-----------------------------------------------------------------------------------------------------------------------------------------------------------------------------------------------------------------------------------------------------------------------------------------------------------------------------------------------------------------------------------------------------------------------------------------------------------------------------------------------------------------------------------------------------------------------------------------------------------------------------------------------------------------------------------------------------------------------------------------------------------------------------------------------------------------------------|
| Journal:                      | <i>BMJ Open</i>                                                                                                                                                                                                                                                                                                                                                                                                                                                                                                                                                                                                                                                                                                                                                                                                             |
| Manuscript ID                 | bmjopen-2022-066587                                                                                                                                                                                                                                                                                                                                                                                                                                                                                                                                                                                                                                                                                                                                                                                                         |
| Article Type:                 | Original research                                                                                                                                                                                                                                                                                                                                                                                                                                                                                                                                                                                                                                                                                                                                                                                                           |
| Date Submitted by the Author: | 15-Jul-2022                                                                                                                                                                                                                                                                                                                                                                                                                                                                                                                                                                                                                                                                                                                                                                                                                 |
| Complete List of Authors:     | Ling, Miaw Yn; Universiti Kebangsaan Malaysia, Department of Community Health<br>Halim, Ahmad Farid Nazmi Abdul; Universiti Kebangsaan Malaysia, Department of Community Health<br>Ahmad, Dzulfitee; Universiti Kebangsaan Malaysia, Department of Community Health<br>Ramly, Nurfatehar; Universiti Kebangsaan Malaysia, Department of Community Health<br>Hassan, Mohd Rohaizat; Universiti Kebangsaan Malaysia, Department of Community Health<br>Syed Abdul Rahim, Syed Sharizman; Universiti Malaysia Sabah, Department of Public Health Medicine<br>Saffree Jeffree, Mohammad ; Universiti Malaysia Sabah, Department of Public Health Medicine<br>Omar, Azizan; Universiti Malaysia Sabah, Department of Public Health Medicine<br>Hidrus, Aizuddin; Universiti Malaysia Sabah, Department of Public Health Medicine |
| Keywords:                     | Epidemiology < TROPICAL MEDICINE, EPIDEMIOLOGY, Public health < INFECTIOUS DISEASES                                                                                                                                                                                                                                                                                                                                                                                                                                                                                                                                                                                                                                                                                                                                         |
|                               |                                                                                                                                                                                                                                                                                                                                                                                                                                                                                                                                                                                                                                                                                                                                                                                                                             |

SCHOLARONE™  
Manuscripts

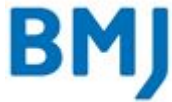

I, the Submitting Author has the right to grant and does grant on behalf of all authors of the Work (as defined in the below author licence), an exclusive licence and/or a non-exclusive licence for contributions from authors who are: i) UK Crown employees; ii) where BMJ has agreed a CC-BY licence shall apply, and/or iii) in accordance with the terms applicable for US Federal Government officers or employees acting as part of their official duties; on a worldwide, perpetual, irrevocable, royalty-free basis to BMJ Publishing Group Ltd ("BMJ") its licensees and where the relevant Journal is co-owned by BMJ to the co-owners of the Journal, to publish the Work in this journal and any other BMJ products and to exploit all rights, as set out in our [licence](#).

The Submitting Author accepts and understands that any supply made under these terms is made by BMJ to the Submitting Author unless you are acting as an employee on behalf of your employer or a postgraduate student of an affiliated institution which is paying any applicable article publishing charge ("APC") for Open Access articles. Where the Submitting Author wishes to make the Work available on an Open Access basis (and intends to pay the relevant APC), the terms of reuse of such Open Access shall be governed by a Creative Commons licence – details of these licences and which [Creative Commons](#) licence will apply to this Work are set out in our licence referred to above.

Other than as permitted in any relevant BMJ Author's Self Archiving Policies, I confirm this Work has not been accepted for publication elsewhere, is not being considered for publication elsewhere and does not duplicate material already published. I confirm all authors consent to publication of this Work and authorise the granting of this licence.

# 1 Rabies in Southeast Asia: a systematic review of its epidemiology and impact

2 Jane Ling Miaw Yn<sup>1</sup>, Ahmad Farid Nazmi Abdul Halim<sup>1</sup>, Dzulfitee Ahmad<sup>1</sup>, Nurfatehar Ramly<sup>1</sup>,  
3 Mohd Rohaizat Hassan<sup>1</sup>, Syed Sharizman Syed Abdul Rahim<sup>2</sup>, Mohammad Saffree Jeffree<sup>2</sup>,  
4 Azizan Omar<sup>2</sup>, \*Aizuddin Hidrus<sup>2</sup>

5  
6 <sup>1</sup>*Department of Community Health, Faculty of Medicine, Universiti Kebangsaan Malaysia,*  
7 *Bandar Tun Razak, Kuala Lumpur, Malaysia*

8 <sup>2</sup>*Department of Public Health Medicine, Faculty of Medicine and Health Sciences, Universiti*  
9 *Malaysia Sabah*

10  
11 \*Correspondence:

12 Aizuddin Hidrus

13 Department of Public Health Medicine, Faculty of Medicine and Health Sciences, Universiti

14 Malaysia Sabah

15 Tel: +6088 320000

16 Email: [aizuddin88@ums.edu.my](mailto:aizuddin88@ums.edu.my)

## 18 Abstract

19 **Objective:** Rabies is a neglected zoonotic disease that can infect all mammals, including  
20 humans. We aimed to summarize current knowledge on the epidemiology and impact of  
21 rabies in Southeast Asia.

22 **Methods:** This systematic review is conducted using PRISMA review protocol and formulation  
23 of research questions based on CoCoPop (condition, context, population) and PEO  
24 (population, exposure, outcome) concepts. The selected databases included Scopus, Web of

1  
2  
3 25 Science, and PubMed. After a thorough screening, 7 articles were selected to proceed with  
4  
5  
6 26 quality appraisal using Mixed Method Appraisal Tool.

7  
8 27 **Results:** A total of 7 articles were included in this analysis. In Vietnam, the incidence of rabies  
9  
10 28 ranged from 1.7 to 117.2 per 100,000 from 2011 to 2015 with higher incidences observed in  
11  
12  
13 29 southern Vietnam, particularly in the Mekong River Delta and South-Central Coast. The  
14  
15 30 cumulative incidence in Sibiu, Sarawak was estimated at 1.7 per 100,000 population. In  
16  
17  
18 31 Indonesia, 104 human rabies cases were reported in Bali from November 2008 to November  
19  
20 32 2010 while a total of 46 confirmed and probable cases of human rabies were reported in  
21  
22  
23 33 Thailand from 2010 to 2015. Most cases were male. Increased risk of rabies virus infection  
24  
25 34 was associated with high population density, illiteracy, seasonal patterns as well as among  
26  
27  
28 35 dog butchers. Almost all cases had a history of dog bites. The case-fatality rate was 100%.

29  
30 36 **Conclusion:** The presence of rabies cases in Southeast Asia is due to a high number of  
31  
32 37 unvaccinated stray and pet dogs, working hazards (dog butcher in Vietnam), the unavailability  
33  
34  
35 38 of rabies vaccine in rural regions, and misinformation about the significance of seeking  
36  
37  
38 39 treatment after dog bites.

39  
40 40 **Keywords:** Rabies, dog bite, zoonotic disease, epidemiology, Southeast Asia

#### 41 41 **Strengths and limitations**

42  
43 42 This study only includes research from Southeast Asia, which may not represent rabies  
44  
45 43 infection in other regions or continents. Furthermore, we only used three databases, which  
46  
47  
48 44 may have limited the article's resources. We did not include grey literature or national  
49  
50  
51 45 guidelines, which could have been useful in this study. Our strengths, however, are that we  
52  
53  
54 46 can tailor the control program specifically for Southeast countries, and we are aware of the  
55  
56  
57 47 true burden of rabies infection in our region.

## 48 Introduction

49 Rabies is a neglected zoonotic disease that is caused by an RNA virus from the family of  
50 *Rhabdoviridae*, genus *Lyssavirus* (1). Once clinical symptoms appear, rabies is almost 100%  
51 fatal (2). All mammals can be infected with the rabies virus, including humans. More than  
52 99% of human rabies cases are transmitted via dogs (3). With the necessary evidence and  
53 tools in place for control and elimination of rabies, canine rabies can be eliminated, as  
54 demonstrated in Western Europe, Canada, the United States of America (USA), Japan, a few  
55 Latin American countries, and many parts in Asia. However, rabies is still widespread,  
56 occurring in more than 80 countries, particularly in the developing countries in Africa and Asia  
57 (3,4). Furthermore, half of the global population lives in canine rabies-endemic areas hence  
58 is at risk of contracting rabies (3).

59 Globally, canine rabies was estimated to cause approximately 59,000 human deaths  
60 annually. Rabies is clearly a major problem in Asia. The number of human deaths due to rabies  
61 in Asia is higher than in any other region in the world. Most human rabies deaths occurred in  
62 Asia (59.6%), followed by Africa (36.4%), while only less than 0.05% of human rabies deaths  
63 occurred in the Americas. Additionally, India alone accounts for 35% of global human rabies  
64 deaths, which was higher than any other country (4). In Asia, canine rabies was estimated to  
65 cause a loss of 2.2 million Disability-Adjusted Life Years (DALYs) per year, while the annual  
66 cost of post-exposure prophylaxis (PEP) was highest in Asia, with estimates up to US\$ 1.5  
67 billion (5).

68 In Southeast Asia, only Singapore has eradicated canine rabies through the  
69 implementation of robust national rabies control programs, while other countries in this  
70 subregion were not considered to be rabies-free (6). Malaysia was once declared to be rabies-  
71 free by the World Animal Health Organisation in July 2013, but several rabies outbreaks since

1  
2  
3 72 2015 have relegated Malaysia down from its rabies-free status (7). Even though Thailand and  
4  
5  
6 73 Vietnam have not been able to eliminate rabies, there was a substantial reduction of human  
7  
8 74 rabies deaths through the implementation of dog mass vaccination, intensified post-exposure  
9  
10  
11 75 prophylaxis in humans, and awareness education (8).

12  
13 76 Rabies is 100 percent preventable through vaccination in animals and humans (9). The  
14  
15 77 World Health Organization (WHO) recommended pre-exposure prophylaxis (PrEP) for those  
16  
17  
18 78 with continual, frequent, or increased risk of exposure to rabies virus (e.g., veterinarians,  
19  
20 79 animal handlers). If exposed to a rabid animal, the WHO recommended PEP, which consists  
21  
22  
23 80 of immediate wound management, immediate vaccination, as well as administration of rabies  
24  
25 81 immunoglobulin for high-risk exposure (10). Nevertheless, dog vaccination is considered the  
26  
27  
28 82 most cost-effective strategy for preventing rabies in humans (2).

29  
30 83 Despite the availability of evidence and guidelines for the control and management of  
31  
32  
33 84 rabies, there are some constraints faced by countries in Southeast Asia in controlling rabies,  
34  
35 85 including inadequate resources, lack of political commitment, lack of consensus on strategy,  
36  
37  
38 86 weak intersectoral coordination, insensitive surveillance systems, limited accessibility to  
39  
40 87 modern rabies vaccine and supply problem, as well as lack of public awareness and  
41  
42  
43 88 cooperation (8). The high estimated burden for rabies more than justifies the need to  
44  
45 89 prioritize rabies control, particularly in Asian countries.

46  
47 90 Information on rabies epidemiology is a prerequisite for effective planning of rabies  
48  
49  
50 91 control programs. Previous systematic reviews focused on rabies epidemiology in India (11),  
51  
52  
53 92 Nepal (1), and Arab countries (12), while literature synthesizing data regarding rabies  
54  
55  
56 93 epidemiology in Southeast Asia are limited. Hence, this systematic review aims to provide an  
57  
58  
59 94 in-depth assessment of the rabies situation in Southeast Asia countries, based on the  
60  
95 published literature.

## 96 **Materials and Methods**

97 This systematic review is reported in accordance with the Preferred Reporting Items for  
98 Systematic Reviews and Meta-Analyses (PRISMA) 2020 statement (13).

### 99 ***Patient and Public involvement***

100 No patient and/or public involvement in this study (None).

### 101 ***Research Question Formulation***

102 The review question was developed based on the CoCoPop (condition, context, population)  
103 and PEO (population, exposure, outcome) concept (14). The PICO (population, intervention,  
104 comparison intervention, outcome measures) framework is commonly used in developing  
105 focused clinical questions for quantitative reviews (15), while the CoCoPop and PEO concepts  
106 are suitable for reviews related to prevalence and aetiology (14). Based on the CoCoPop  
107 concept, the condition refers to the epidemiology of rabies, the context refers to Southeast  
108 Asia and the population is the general population. Based on the PEO concept, population  
109 refers to the general population in Southeast Asia, exposure refers to rabies and the outcome  
110 is the impact of rabies. Epidemiology of rabies was defined as the number of outbreaks, cases,  
111 and its causes/risk factors, while the impact was defined as rabies mortality. Hence, the main  
112 research questions are: (1) What is the epidemiology of rabies among the general population  
113 in Southeast Asia countries? and (2) What is the impact (mortality) of rabies among the  
114 general population in Southeast Asia countries?

### 115 ***Data Source and Search Strategy***

116 The literature search was conducted in December 2021. For a comprehensive search, we used  
117 Scopus, Web of Science, and PubMed databases. The keywords used for the searching of  
118 related articles are provided in Table 1.

119



120

121 Table 1: Keywords search used in the screening process

| Database       | Search string                                                                                                                                                                                                                                                                                                                                                                                                                                                                                                                                                                                                                                                                                                                                                                                                                                                                                                                                           |
|----------------|---------------------------------------------------------------------------------------------------------------------------------------------------------------------------------------------------------------------------------------------------------------------------------------------------------------------------------------------------------------------------------------------------------------------------------------------------------------------------------------------------------------------------------------------------------------------------------------------------------------------------------------------------------------------------------------------------------------------------------------------------------------------------------------------------------------------------------------------------------------------------------------------------------------------------------------------------------|
| Scopus         | <p>1) TITLE-ABS-KEY(("rabies*" OR "rabies virus*" OR "dog bite*") AND ("Southeast Asia" OR "Brunei" OR "Myanmar" OR "Cambodia" OR "Timor-Leste" OR "Indonesia" OR "Laos" OR "Malaysia" OR "Philippines" OR "Singapore" OR "Thailand" OR "Vietnam") AND ("epidemiology" OR "outbreak" OR "case" OR "prevalence" OR "incidence" OR "causes" OR "risk factor"))</p> <p>2) TITLE-ABS-KEY(("Rabies*" OR "Rabies virus*" OR "dog bite*") AND ("Southeast Asia" OR "Brunei" OR "Myanmar" OR "Cambodia" OR "Timor-Leste" OR "Indonesia" OR "Laos" OR "Malaysia" OR "Philippines" OR "Singapore" OR "Thailand" OR "Vietnam") AND ("mortality*" OR "death*" OR "fatality*"))</p>                                                                                                                                                                                                                                                                                  |
| Web of Science | <p>1) (((ALL=("rabies*")) OR ALL=("rabies virus*")) OR ALL=("dog bite*")) AND (((((((((((ALL=("Southeast Asia")) OR ALL=("Brunei")) OR ALL=("Myanmar")) OR ALL=("Cambodia")) OR ALL=("Timor-Leste")) OR ALL=("Indonesia")) OR ALL=("Laos")) OR ALL=("Malaysia")) OR ALL=("Philippines")) OR ALL=("Singapore")) OR ALL=("Thailand")) OR ALL=("Vietnam")) AND (((((ALL=("epidemiology")) OR ALL=("outbreak")) OR ALL=("case")) OR ALL=("prevalence")) OR ALL=("incidence")) OR ALL=("causes")) OR ALL=("risk factor"))</p> <p>2) (((ALL=("rabies*")) OR ALL=("rabies virus*")) OR ALL=("dog bite*")) AND (((((((((((ALL=("Southeast Asia")) OR ALL=("Brunei")) OR ALL=("Myanmar")) OR ALL=("Cambodia")) OR ALL=("Timor-Leste")) OR ALL=("Indonesia")) OR ALL=("Laos")) OR ALL=("Malaysia")) OR ALL=("Philippines")) OR ALL=("Singapore")) OR ALL=("Thailand")) OR ALL=("Vietnam")) AND ((ALL=("mortality*")) OR ALL=("death*")) OR ALL=("fatality*"))</p> |
| PubMed         | <p>1) (((("rabies*" OR "rabies virus*") OR ("dog bite*")) AND (((((((((((("Southeast Asia" OR "brunei") OR ("Myanmar")) OR ("Cambodia") OR ("Timor-Leste")) OR ("Indonesia")) OR ("Laos")) OR ("Malaysia")) OR ("Philippines")) OR ("Singapore")) OR ("Thailand")) OR ("Vietnam")))) AND (((((((("epidemiology" OR "outbreak")) OR ("case") OR ("prevalence")) OR ("incidence")) OR ("causes")) OR ("risk factor"))</p>                                                                                                                                                                                                                                                                                                                                                                                                                                                                                                                                 |

|  |                                                                                                                                                                                                                                                                                                                                                |
|--|------------------------------------------------------------------------------------------------------------------------------------------------------------------------------------------------------------------------------------------------------------------------------------------------------------------------------------------------|
|  | 2) (((("rabies*") OR ("rabies virus*") OR ("dog bite*")) AND (((((((((((("Southeast Asia") OR ("brunei")) OR ("Myanmar")) OR ("Cambodia")) OR ("Timor-Leste")) OR ("Indonesia")) OR ("Laos")) OR ("Malaysia")) OR ("Philippines")) OR ("Singapore")) OR ("Thailand")) OR ("Vietnam")))) AND (((("mortality*") OR ("death*")) OR ("fatality*")) |
|--|------------------------------------------------------------------------------------------------------------------------------------------------------------------------------------------------------------------------------------------------------------------------------------------------------------------------------------------------|

122

### 123 **Study Selection**

124 The inclusion criteria were: (1) publication from 2012-2021; (2) original article; (3) publication  
 125 in the English language. Studies with these characteristics were included in this review: (1)  
 126 report on the epidemiology of rabies in Southeast Asia; and (2) report on the impact of rabies  
 127 in Southeast Asia. Non-original articles such as conference proceedings, perspectives,  
 128 commentary, opinion, reports, systematic reviews, and meta-analyses were excluded.

### 129 **Data Extraction and Synthesis**

130 Duplicates were deleted, and at least two reviewers re-screened the remaining papers. Before  
 131 being included in the review, articles were screened in three stages. Any article that did not  
 132 meet the inclusion criteria from title screening was eliminated in the first phase. The abstracts  
 133 of the remaining papers were reviewed in the second phase, and any publications that did  
 134 not fit our inclusion criteria were eliminated from the review. The full-text articles were  
 135 examined attentively in the last phase to eliminate any papers that did not fulfil our inclusion  
 136 criteria. Before the data extraction process, both reviewers must agree that the entire  
 137 publications should be reviewed. Any disagreements were worked out through discussion. All  
 138 data extraction was conducted independently using a standardized data extraction form  
 139 which was organized using Microsoft Excel. Information collected in the form included (1)  
 140 author, (2) publication year, (3) reference, (4) country, (5) study design, (6) statistical analysis,  
 141 and (7) results.

142

1  
2  
3 **143 Quality Appraisal**  
4

5  
6 **144** Quality appraisal was conducted by authors on all 7 studies using the Mixed Method Appraisal  
7  
8 **145** Tool (MMAT) (16). The MMAT is a critical appraisal tool that is developed to appraise studies  
9  
10 **146** included in systematic mixed study reviews. The methodology quality of five categories of  
11  
12 **147** studies (qualitative study, randomized control trials, non-randomized studies, quantitative  
13  
14 **148** descriptive study, and mixed methods study) can be appraised using this tool. For each  
15  
16 **149** category, five criteria are used to assess the quality of the study. It is advised not to calculate  
17  
18 **150** an overall score from the rating of each criterion using the latest version of MMAT (2018).  
19  
20 **151** However, due to problems faced by researchers in reporting the MMAT results, a suggestion  
21  
22 **152** was provided for reporting an overall score (5\*\*\*\*\*/100% quality criteria met; 4\*\*\*\*\*/80%  
23  
24 **153** quality criteria met; 3\*\*\*\*\*/60% quality criteria met; 2\*\*\*\*\*/40% quality criteria met; 1\*\*\*\*\*/20%  
25  
26 **154** quality criteria met). The details of this assessment are reported in Table 2.  
27  
28  
29  
30  
31  
32

33 **155** Table 2: The details of mixed method appraisal tool assessment  
34

| <b>Author</b>      | <b>Type of study</b> | <b>Score</b> | <b>1.1</b>                                                          | <b>1.2</b>                                             | <b>1.3</b>                        | <b>1.4</b>                           | <b>1.5</b>                                                               |
|--------------------|----------------------|--------------|---------------------------------------------------------------------|--------------------------------------------------------|-----------------------------------|--------------------------------------|--------------------------------------------------------------------------|
|                    |                      |              | Is the sampling strategy relevant to address the research question? | Is the sample representative of the target population? | Are the measurements appropriate? | Is the risk of nonresponse bias low? | Is the statistical analysis appropriate to answer the research question? |
| Nguyen et al. 2021 | Quantitative         | 40%          | Can't tell                                                          | Can't tell                                             | Yes                               | Can't tell                           | Yes                                                                      |

|                        |              |      |     |            |     |            |     |
|------------------------|--------------|------|-----|------------|-----|------------|-----|
| Pham et al. 2021       | Quantitative | 100% | Yes | Yes        | Yes | Yes        | Yes |
| Sim et al. 2021        | Quantitative | 60%  | Yes | Can't tell | Yes | Can't tell | Yes |
| Yurachai et al. 2021   | Quantitative | 80%  | Yes | Yes        | Yes | Can't tell | Yes |
| Phung et al. 2018      | Quantitative | 80%  | Yes | Yes        | Yes | Can't tell | Yes |
| Susilawati et al. 2012 | Quantitative | 80%  | Yes | Yes        | Yes | Yes        | No  |
| Lee et al. 2017        | Quantitative | 100% | Yes | Yes        | Yes | Yes        | Yes |

156

## 157 Results

158 There were 1,366 records identified from the three databases to evaluate the epidemiology  
 159 of rabies and its impact in Southeast Asia. Using automation tools, 813 records were excluded  
 160 based on year, publication type, and language. A total of 73 duplicate records were found and  
 161 removed, leaving 480 records for title screening. We screened the titles and abstracts  
 162 independently based on the review questions. A total of 462 articles were removed during  
 163 the screening. For the remaining 18 articles, the full text was retrieved for assessment of  
 164 eligibility. Disagreements were resolved through discussion to reach a consensus. 11 articles  
 165 were removed as they were not according to the objective (4), not primary/original research  
 166 articles (5) and the full article could not be retrieved (2), leaving a total of 7 articles to proceed  
 167 with a quality appraisal. Our search PRISMA flowchart is presented in Figure 1.

168

169

1  
2  
3 170 ***Background of the Eligible Studies***  
4

5  
6 171 A total of 7 studies were included in this systematic review in which 4 studies were conducted  
7  
8 172 in Vietnam, and 1 each from Indonesia, Malaysia, and Thailand (Table 3). The theme discussed  
9  
10 173 by all studies was epidemiology (number of cases, incidence rates, distributions, causes, risk  
11  
12  
13 174 factors) of rabies in Southeast Asia. Among the included studies, 2 studies particularly  
14  
15 175 discussed rabies's impact (mortality).  
16  
17  
18  
19  
20  
21  
22  
23  
24  
25  
26  
27  
28  
29  
30  
31  
32  
33  
34  
35  
36  
37  
38  
39  
40  
41  
42  
43  
44  
45  
46  
47  
48  
49  
50  
51  
52  
53  
54  
55  
56  
57  
58  
59  
60

176 Table 3: Table of evidence

| Author/year        | Country  | Reference                                                                                                                                                                                                                                                                                                                                        | Study design    | Statistical analysis                                       | Result                                                                                                                                                                                                                                                                                                 |
|--------------------|----------|--------------------------------------------------------------------------------------------------------------------------------------------------------------------------------------------------------------------------------------------------------------------------------------------------------------------------------------------------|-----------------|------------------------------------------------------------|--------------------------------------------------------------------------------------------------------------------------------------------------------------------------------------------------------------------------------------------------------------------------------------------------------|
| Nguyen et al. 2021 | Vietnam  | Nguyen, A. K. T., Vu, A. H., Nguyen, T. T., Nguyen, D. V., Ngo, G. C., Pham, T. Q., Inoue, S., et al. 2021. Risk factors and protective immunity against rabies in unvaccinated butchers working at dog slaughterhouses in Northern Vietnam. <i>American Journal of Tropical Medicine and Hygiene</i> 105(3): 788–793. doi:10.4269/ajtmh.20-1172 | Cross-sectional | Pearson correlation<br>Multivariate regression<br>analysis | Study found that 28.3% of butchers were at risk of rabies exposure due to slaughtering sick dog, getting bitten, scratched or knife cut. Only 8.6% had NTA sufficient for protection and only 8.1% of them were vaccinated. Hence dog butchers in Vietnam were at high risk of rabies virus infection. |
| Pham et al. 2021   | Vietnam  | Pham, Q. D., Phan, L. T., Nguyen, T. P. T., Doan, Q. M. N., Nguyen, H. D., Luong, Q. C. & Nguyen, T. V. 2021. An Evaluation of the Rabies Surveillance in Southern Vietnam. <i>Frontiers in Public Health</i> 9(April): 1–9. doi:10.3389/fpubh.2021.610905                                                                                       | Cross-sectional | Descriptive<br>Chi-square test / Fisher's<br>exact test    | 94 human rabies cases (2009-2018) were reported in Southern Vietnam, with an average of nine cases recorded annually (2.7 cases per 10 million population). The highest number was reported in 2018. Majority of cases were male and those aged 50 years and above.                                    |
| Sim et al. 2021    | Malaysia | Sim, B. N. H., Liang, B. N. W., Ning, W. S. & Viswanathan, S. 2021. A retrospective analysis of emerging rabies: A neglected tropical disease in Sarawak, Malaysia. <i>Journal of the</i>                                                                                                                                                        | Cross-sectional | Descriptive                                                | 6 cases were identified with a mixture of MN and LMN findings. Most cases did not seek medical attention upon dog bite. The incubation period varied from 17 days to 2 years. All cases died, with 5 cases succumbing to the illness within 2 weeks of symptoms onset. The cumulative                  |

1  
2  
3  
4  
5  
6  
7  
8  
9  
10  
11  
12  
13  
14  
15  
16  
17  
18  
19  
20  
21  
22  
23  
24  
25  
26  
27  
28  
29  
30  
31  
32  
33  
34  
35  
36  
37  
38  
39  
40  
41  
42  
43  
44  
45  
46

*Royal College of Physicians of Edinburgh* 51(2): 133–139.  
doi:10.4997/JRCPE.2021.207

incidence in Sibu was estimated at 1.7 per 100,000 population.

Yurachai et al. 2021 Thailand Yurachai, O., Hinjoy, S. & Wallace, R. M. 2020. An epidemiological study of suspected rabies exposures and adherence to rabies post-exposure prophylaxis in Eastern Thailand, 2015. *PLoS Neglected Tropical Diseases* 14(2): 1–17.  
doi:10.1371/journal.pntd.0007248

46 confirmed and probable cases of human rabies were reported in Thailand (2010–2015). 11 were reported from Eastern Thailand. 6,204 suspected rabies exposure reported in 8 Eastern Thailand. Children age < 15 years and elderly age > 60 years had the highest suspected reported exposure rate compared to others (189.7/ 100,000 and 189.2/100,000). Overall, the estimated suspected rabies exposure rate was 204/100,000.

Susilawati et al. 2012 Indonesia Susilawathi, N. M., Darwinata, A. E., Dwija, I. B. N. P., Budayanti, N. S., Wirasandhi, G. A. K., Subrata, K., Susilarini, N. K., et al. 2012. Epidemiological and clinical features of human rabies cases in Bali 2008-2010. *BMC Infectious Diseases* 12(November 2008): 0–7.  
doi:10.1186/1471-2334-12-81

104 human rabies cases reported in Bali during November 2008-November 2010 which all are fatal and the symptom exhibit by all patients. Almost all (92%) cases had a history of dog bite. Only 5.8% had their wounds treated and received an anti-rabies vaccine (ARV) after the bite incident. The case-fatality rate was 100%.

178

**179 *Epidemiology of Rabies in Southeast Asia Countries***

180 The average monthly number of rabies cases in Vietnam is 429 during the period from 2011  
181 to 2015, where the incidences of rabies ranged from 1.7 to 117.2 per 100,000 with higher  
182 incidences observed in Red River, South Central Coast (SCC), and the Mekong Delta regions  
183 (17). Specific to Southern Vietnam, a total of 94 human rabies cases between 2009 and 2018  
184 were reported, with an average of nine cases recorded annually, representing an incidence of  
185 2.7 cases per 10 million population (18). The highest number was reported in 2018 (5.5 cases  
186 per 10 million population). Most cases were male and those aged 50 years and above.

187 Dog butchers in Vietnam were at high risk of rabies virus infection (19). The study  
188 found that 28.3% of butchers were at risk of rabies exposure due to slaughtering sick dogs,  
189 getting bitten, scratched, or knife cut. Among 406 participants, 8.6% had rabies neutralizing  
190 antibody (NTA) sufficient for protection and only 8.1% of them were vaccinated. In terms of  
191 location, rabies cases were limited to specific areas. Hotspots were identified in southern  
192 Vietnam, particularly in the Mekong River Delta (MRD) and South-Central Coast (SCC) (20).  
193 Seasonal patterns were found in which a strong peak in February/ July and a minor peak in  
194 October/ December in the MRD Region. However, a strong peak was detected in the middle  
195 of each year in the SCC. Temperature, humidity, and cumulative rainfall are positively  
196 associated with an increase in incidences of rabies in Vietnam. In terms of socio-economic  
197 factors, increases in population density, as well as the percentages of illiteracy, were sensitive  
198 factors for elevated risk of rabies (17).

199 In Indonesia, 104 human rabies cases were reported in Bali from November 2008 to  
200 November 2010. Most of the cases were male. Almost all (92%) cases had a history of a dog  
201 bite. Only 5.8% had their wounds treated and received an anti-rabies vaccine (ARV) after the



1  
2  
3 202 bite incident (21). Even worse, rabies cases in Sibul, Sarawak did not seek medical attention  
4  
5  
6 203 upon dog bite as well (22). The cumulative incidence in Sibul was estimated at 1.7 per 100,000  
7  
8 204 population. The incubation period varied from 17 days to 2 years.

9  
10 205 A total of 46 confirmed and probable cases of human rabies were reported in Thailand  
11  
12  
13 206 from 2010 to 2015, in which 11 were reported from Eastern Thailand (23). Even though rabies  
14  
15 207 can be prevented by vaccination, more than 90% of rabies deaths in Thailand did not get or  
16  
17  
18 208 improperly stopped receiving PEP. In terms of suspected rabies exposures, 6,204 exposures  
19  
20 209 were reported from eight provinces in Eastern Thailand, resulting in a crude exposure rate of  
21  
22  
23 210 106 reported rabies exposures per 100,000 people. Dogs were the main source of exposure  
24  
25 211 (77.8%), while children under the age of 15 and the elderly over the age of 60 had the highest  
26  
27  
28 212 overall reported exposure rates (189.7 and 189.2/100,000, respectively).

### 29 30 213 ***Impact of Rabies in Southeast Asia Countries***

31  
32 214 The case-fatality rate was 100% as (21,22). Among 6 cases reported in Sibul, 5 cases  
33  
34  
35 215 succumbed to the illness within 2 weeks of symptoms onset.

### 36 37 216 **Discussion**

#### 38 39 40 217 ***Epidemiology of Rabies in Southeast Asia Countries (Distribution, Causes/Risk Factors of*** 41 42 218 ***Rabies)***

43  
44 219 Rabies in Asia and Africa contributes to over 99% of human rabies deaths that occur in the  
45  
46  
47 220 world today. The vast majority of 60% of these deaths are in Asia (24). Every year, an  
48  
49  
50 221 estimated 59,000 people die from rabies worldwide, with the majority (95%) of these deaths  
51  
52 222 occurring in Africa and Asia due to a lack of post-exposure prophylaxis (PEP) services for  
53  
54  
55 223 animal-bite patients and rabies surveillance personnel and facilities (25). This support the  
56  
57 224 result of our study which shows that there is a high number of rabies cases reported in  
58  
59 225 Vietnam, Indonesia, and Thailand, which are medium endemic rabies country (26).  
60

1  
2  
3 226 Rabies is concentrated in Asia and Southeast Asia region because rabies is frequently  
4  
5  
6 227 neglected when health and agriculture budgets are set although the costs and economic  
7  
8 228 benefits of having rabies prevention programs have been successfully implemented in high-  
9  
10 229 income country (27). The high number of rabies cases in Southeast Asia is also contributed by  
11  
12  
13 230 the high number of unowned, free-roaming dogs that can't be controlled without a lot of  
14  
15 231 effort and thus aren't vaccinated (28). Vaccination programs in dogs can provide herd  
16  
17 232 immunity and break the rabies transmission cycle in this reservoir species and had been  
18  
19  
20 233 successfully applied in several countries around the world (29).

22  
23 234 Another cause of high incidence of rabies in Southeast Asia is due to the working  
24  
25 235 hazard of dog butchers, especially in a country that legalizes dog consumption such as in  
26  
27 236 Vietnam (30). Professional dog butchers in northern Vietnam are at a high risk of rabies virus  
28  
29 237 infection due to exposure during the slaughtering process, which was from the slaughtering  
30  
31 238 of sick or dead dogs, getting bitten, scratched, or knife cut. (91.9%) professional dog butchers  
32  
33 239 in Vietnam were not vaccinated against rabies, which maybe because of the fear of side  
34  
35 240 effects of rabies vaccine, inability to afford vaccination, and incorrect knowledge of rabies  
36  
37 241 prevention (19).

#### 22 242 ***Impact of Rabies in Southeast Asia Countries (Cases/Outbreak, Morbidity/Mortality)***

243 In this study, rabies had a high fatality rate, with 100 percent of infected cases dying. This is  
244 supported by a review done in Africa by Nyasulu et al 2021, who reported that Algeria,  
245 Namibia, Eswatini (former Swaziland), Tunisia, Uganda, Zambia, and Zimbabwe had high  
246 morbidity and mortality with 563 cases (33.9 percent deaths), 269 cases (94 percent deaths),  
247 62 cases (88.7 percent deaths), 91 cases (90 percent deaths), 466 cases (40.9 percent), 207  
248 cases (32.8 percent deaths), and 114 (31). Because of the high population of stray dogs in this  
249 area, the chances of being bitten by a dog are high. Not only are the chances of being bitten

1  
2  
3 250 high in these areas, but access to treatment in a timely and adequate manner is also very  
4  
5  
6 251 limited. Rabies vaccines may not be routinely available in rural areas where most exposure  
7  
8 252 occurs, and rabies immunoglobulins, which are required for category III bites, are always in  
9  
10  
11 253 short supply (32).

12  
13 254 This significantly contributes to the high mortality rate, as the highly protective rabies  
14  
15 255 vaccine is frequently unavailable in these poor areas. In addition, the public often gets laid  
16  
17  
18 256 back and not aware to get early treatment after having been bitten by dogs (33). According  
19  
20  
21 257 to recent studies, many rabies victims contracted the disease owing to neglect, ignorance, or  
22  
23 258 a lack of primary health care facilities (34). Thus, health promotion and education should be  
24  
25 259 given to the public as knowledge regarding rabies is essential to reduce morbidity and  
26  
27  
28 260 mortality (5).

29  
30 261 Compared to high-income countries such as the United States, the mortality caused  
31  
32  
33 262 by rabies is low. In the last decade, there have been only 25 cases of human rabies reported  
34  
35 263 in the United States (2009-2018), with 1 to 3 cases reported each year (6). The low causes of  
36  
37 264 rabies infection are due to successful animal control and vaccination programs, successful  
38  
39  
40 265 outreach programs, public health capacity and laboratory diagnostics, and the availability of  
41  
42 266 modern rabies biologics (35). Even though rabies is avoidable, the exorbitant expense of  
43  
44  
45 267 vaccinations, combined with a lack of education and knowledge about the disease, limits PEP  
46  
47 268 use. According to recent studies, many rabies victims contracted the disease owing to neglect,  
48  
49  
50 269 ignorance, or a lack of primary health care facilities (34).

51  
52 270

### 53 54 271 **Recommendation**

55  
56  
57 272 A successful rabies prevention and control program requires integrating and strengthening  
58  
59 273 intersectoral and transdisciplinary collaboration and cooperation among various society  
60

1  
2  
3 274 components (36). The ASEAN Rabies Elimination Strategy places great value on the  
4  
5  
6 275 organizational and One Health frameworks for rabies eradication. The single most significant  
7  
8 276 way to deal with rabies concerns is to eliminate dog-mediated rabies. The requirement for  
9  
10  
11 277 post-exposure human prophylaxis is considerably reduced when dog rabies is eradicated (37).  
12  
13 278 To benefit from synergy and maximization of shared resources, comprehensive rabies control  
14  
15  
16 279 programs should involve the combination of human, financial, and material resources with  
17  
18 280 other interdisciplinary disease programs (24).

19  
20 281         Mass canine vaccination campaigns will boost herd immunity and reduce the risk of  
21  
22 282 human rabies exposure, but this will need strong governmental commitment and extensive  
23  
24 283 social mobilization. The veterinary authority's active engagement in animal rabies control at  
25  
26 284 the national level is critical, and it is their social responsibility to prevent human rabies  
27  
28 285 through well-planned dog rabies control programs (26). In 1983, the Pan American Health  
29  
30 286 Organization had initiated an elimination programme for human rabies transmitted by dogs  
31  
32 287 which were mainly based on mass immunization of dogs, and this has led to a 90% reduction  
33  
34 288 of dog rabies in Chile and other Latin American countries (38).

35  
36  
37  
38  
39 289         Rabies control and elimination in low endemic rabies countries such as Malaysia and  
40  
41 290 Singapore have been made possible by strong enforcement of dog registration, vaccination,  
42  
43 291 and population management measures. Malaysia shares a border with Thailand, and the  
44  
45 292 notion of an immunological belt has been developed through dog licensing, required  
46  
47 293 vaccination of dogs, and systematic extermination of unvaccinated dogs in a buffer zone to  
48  
49 294 prevent rabies from entering their country (26). Perhaps other middle and high endemic  
50  
51 295 rabies countries could follow the rabies control strategy that had been implemented by their  
52  
53 296 Southeast Asia neighbour.  
54  
55  
56  
57  
58  
59  
60

1  
2  
3 297 Public information and education are important to increase awareness and enhance  
4  
5  
6 298 community participation and support in rabies prevention programs. Dissemination of  
7  
8 299 important information such as the high fatality rate of rabies disease, its epidemiology, its  
9  
10 300 prevention and control, the disease control program, in general, is vital for the program  
11  
12  
13 301 implementation and responsible pet ownership. By recognizing rabies' influence on people's  
14  
15 302 daily life and the fact that dogs can be a source of human infection, community and school-  
16  
17  
18 303 based rabies prevention initiatives will be easier to establish (39).

19  
20 304 The involvement of stakeholders is crucial and by bringing together key stakeholders  
21  
22  
23 305 from the corporate and public sectors, we can address health security and the need of forming  
24  
25 306 public-private partnerships which are critical in rabies prevention programs (40). National  
26  
27  
28 307 government agencies can maintain standardized ways for rabies management and  
29  
30 308 elimination and advocate on how to begin public-private cooperation to ensure long-term  
31  
32  
33 309 intervention. All stakeholders can benefit from such technical and administrative effort as  
34  
35 310 they provide credibility and quality assurance for the prevention program's effectiveness (24).  
36  
37  
38 311 Various examples of public-private partnerships that aid in implementing public programs,  
39  
40 312 research, and policy formation can be seen in Bali, Indonesia, India, Sri Lanka, Philippines,  
41  
42 313 Thailand, and Vietnam (3).

#### 314 **Conclusion**

315 Rabies had often been neglected and not given priority in terms of funding for prevention  
316 programs that resulted in the continued presence of rabies cases in Southeast Asia despite  
317 multiple programs being endorsed by WHO. The high number of unvaccinated stray and pet  
318 dogs, working hazard (dog butcher in Vietnam), availability of rabies vaccine in rural areas  
319 also ignorance regarding the importance of seeking treatment after dog bites are the factors  
320 that cause the presence of rabies cases in Southeast Asia.

1  
2  
3 321 **Acknowledgements**  
4

5 322 *I would like to express my appreciation to the Tuaran Area Health Office, Universiti Malaysia*  
6  
7 323 *Sabah, and Universiti Kebangsaan Malaysia for the assistance, guidance, and improvements*  
8  
9 324 *given to complete this research. The authors would also like to thank the Director-General of*  
10  
11 325 *Health Malaysia for approving the publication of this article and supporting this research*  
12  
13 326 *project.*

14 327 **Author contributions**

15  
16 328 *Conceptualization: Jewel Bollah, Syed Sharizman Syed Abdul Rahim.*

17  
18 329 *Data curation: Jewel Bollah, Noraziah Bakri, Wafaak Esa*

19  
20 330 *Formal analysis: Jewel Bollah, Syed Sharizman Syed Abdul Rahim.*

21  
22 331 *Investigation: Jewel Bollah, Noraziah Bakri, Wafaak Esa.*

23  
24 332 *Methodology: Jewel Bollah, Syed Sharizman Syed Abdul Rahim.*

25  
26 333 *Resources: Mohammad Saffree Jeffree, Azman Atil, Mohd Yusof Ibrahim, Mohd Rohaizat*  
27 334 *Hassan.*

28  
29 335 *Writing – original draft: Jewel Bollah, Syed Sharizman Syed Abdul Rahim, Azizan Omar,*  
30 336 *Aizuddin Hidrus.*

31  
32 337 *Writing – review & editing: Nurul Athirah Naserrudin, Ahmad Hazim Mohammad, Azizan*  
33 338 *Omar, Aizuddin Hidrus*

34  
35  
36 339 **Registration and protocol**

37  
38 340 *The review was not registered, and the protocol was not prepared*

39  
40 341 **Financial Disclosure**

41  
42 342 *The study did not receive any special funding*

43  
44 343 **Competing interest**

45  
46 344 *There is no competing interest*

47  
48 345 **Ethics consideration**

49 346 *No ethics approval was required for this systematic review*

50  
51 347 **Data sharing statement**

52  
53 348 *Not applicable*  
54  
55  
56  
57  
58  
59  
60

## References

1. Devleeschauwer B, Aryal A, Sharma BK, Ale A, Declercq A, Depraz S, et al. Epidemiology, Impact and Control of Rabies in Nepal: A Systematic Review. *PLoS Neglected Tropical Diseases*. 2016 Feb 12;10(2).
2. World Health Organization. WHO Fact Sheets: Rabies [Internet]. 2021 [cited 2022 Mar 21]. Available from: <https://www.who.int/news-room/fact-sheets/detail/rabies>
3. World Health Organization. WHO Expert Consultation on Rabies Second report. *World Health Organ Tech Rep Ser*. 2013;1–139.
4. Hampson K, Coudeville L, Lembo T, Sambo M, Kieffer A, Attlan M, et al. Estimating the Global Burden of Endemic Canine Rabies. *PLoS Neglected Tropical Diseases*. 2015 Apr 16;9(4).
5. World Health Organization. WHO expert consultation on rabies: Third Report (Vol. 1012). 2018.
6. Center for Disease Control and Prevention. Rabies Status: Assessment by Country [Internet]. 2021 [cited 2022 Mar 21]. Available from: <https://www.cdc.gov/rabies/resources/countries-risk.html>
7. Navanithakumar B, Sohayati A, Rohaiza Y, Sarah D, Mariani H, Leonora T, et al. An Overview of Rabies Outbreaks in Malaysia, Ordinances and Laws. *Malaysian Journal of Veterinary Research*. 2019;10(2):148–58.
8. Tenzin, Ward MP. Review of Rabies Epidemiology and Control in South, South-East and East Asia: Past, Present and Prospects for Elimination. Vol. 59, *Zoonoses and Public Health*. 2012. p. 451–67.
9. Abela-Ridder B. Rabies: 100 per cent fatal, 100 per cent preventable. *Vet Rec*. 2015 Aug;177(6):148–9.
10. World Health Organization. Rabies vaccines:WHO position paper. *Weekly epidemiological record = Relevé épidémiologique hebdomadaire*. 2010;85(32):309–20.
11. John D, Royal A, Bharti O. Burden of illness of dog-mediated rabies in India: A systematic review. *Clinical Epidemiology and Global Health*. 2021 Oct 1;12.
12. Alaifan T, Altamimi A. A Systematic Review of epidemiology of Rabies in Arab countries. *Journal of Health Informatics in Developing Countries*. 2019;13(2).
13. Page MJ, McKenzie JE, Bossuyt PM, Boutron I, Hoffmann TC, Mulrow CD, et al. The PRISMA 2020 statement: An updated guideline for reporting systematic reviews. *International Journal of Surgery*. 2021 Apr 1;88.
14. Munn Z, Stern C, Aromataris E, Lockwood C, Jordan Z. What kind of systematic review should I conduct? A proposed typology and guidance for systematic reviewers in the medical and health sciences. Vol. 18, *BMC Medical Research Methodology*. BioMed Central Ltd.; 2018.
15. Stern C, Al E, Sigurdson C, Middlet A, Kerr S, Lawrence M. Developing the Review Question and Inclusion Criteria. *AJN The American Journal of Nursing*. 2014;114(4):53–6.



16. Hong QN, Fàbregues S, Bartlett G, Boardman F, Cargo M, Dagenais P, et al. The Mixed Methods Appraisal Tool (MMAT) version 2018 for information professionals and researchers. *Education for Information*. 2018;34(4):285–91.
17. Phung D, Nguyen HX, Thi Nguyen HL, Luong AM, Do CM, Tran QD, et al. The effects of socioecological factors on variation of communicable diseases: A multiple-disease study at the national scale of Vietnam. *PLoS ONE*. 2018 Mar 1;13(3).
18. Pham QD, Phan LT, Nguyen TPT, Doan QMN, Nguyen HD, Luong QC, et al. An Evaluation of the Rabies Surveillance in Southern Vietnam. *Frontiers in Public Health*. 2021 Apr 29;9.
19. Nguyen AKT, Vu AH, Nguyen TT, Nguyen DV, Ngo GC, Pham TQ, et al. Risk Factors and Protective Immunity Against Rabies in Unvaccinated Butchers Working at Dog Slaughterhouses in Northern Vietnam. *The American Journal of Tropical Medicine and Hygiene*. 2021 Aug 2;
20. Lee HS, Thiem VD, Anh DD, Duong TN, Lee M, Grace D, et al. Geographical and temporal patterns of rabies post exposure prophylaxis (PEP) incidence in humans in the Mekong River Delta and Southeast Central Coast regions in Vietnam from 2005 to 2015. Vol. 13, *PLoS ONE*. Public Library of Science; 2018.
21. Susilawathi NM, Darwinata AE, Dwija IBNP, Budayanti NS, Wirasandhi GAK, Subrata K, et al. Epidemiological and clinical features of human rabies cases in Bali 2008-2010. *BMC Infectious Diseases*. 2012 Apr 2;12.
22. Sim BNH, Liang BNW, Ning WS, Viswanathan S. A retrospective analysis of emerging rabies: a neglected tropical disease in Sarawak, Malaysia. *Journal of the Royal College of Physicians of Edinburgh*. 2021;51(2):133–9.
23. Yurachai O, Hinjoy S, Wallace RM. An epidemiological study of suspected rabies exposures and adherence to rabies post-exposure prophylaxis in Eastern Thailand, 2015. *PLoS Neglected Tropical Diseases*. 2020 Feb 1;14(2).
24. Miranda MEG, Miranda NLJ. Rabies prevention in Asia: Institutionalizing implementation capacities. *Rabies and Rabies Vaccines*. Springer, Cham; 2020. 103–116 p.
25. World Health Organization. Human rabies: 2016 updates and call for data. *Wkly Epidemiol Rec*. 2017;92(7):77–86.
26. Gongal G, Wright AE. Human Rabies in the WHO Southeast Asia Region: Forward Steps for Elimination. *Advances in Preventive Medicine*. 2011;2011:1–5.
27. Knobel DL, Cleaveland S, Coleman PG, Fèvre EM, Meltzer MI, Elizabeth M, et al. Re-evaluating the burden of rabies in Africa and Asia. *Bulletin of the World Health Organization*. 2005;83(5):360–8.
28. Chanachai K, Wongphruksasoong V, Vos A, Leelahapongsathon K, Tangwangvivat R, Sagarasaeranee O, et al. Feasibility and effectiveness studies with oral vaccination of free-roaming dogs against rabies in Thailand. *Viruses*. 2021 Apr 1;13(4).
29. Schneider MC, Belotto A, Adé MP, Hendrickx S, Leanes LF, de Rodrigues MJF, et al. Current Status of Human Rabies Transmitted by Dogs in Latin America. *Cad Saúde Pública*. 2007;23:2049–63.



- 1
  - 2
  - 3
  - 4
  - 5
  - 6
  - 7
  - 8
  - 9
  - 10
  - 11
  - 12
  - 13
  - 14
  - 15
  - 16
  - 17
  - 18
  - 19
  - 20
  - 21
  - 22
  - 23
  - 24
  - 25
  - 26
  - 27
  - 28
  - 29
  - 30
  - 31
  - 32
  - 33
  - 34
  - 35
  - 36
  - 37
  - 38
  - 39
  - 40
  - 41
  - 42
  - 43
  - 44
  - 45
  - 46
  - 47
  - 48
  - 49
  - 50
  - 51
  - 52
  - 53
  - 54
  - 55
  - 56
  - 57
  - 58
  - 59
  - 60
30. Nguyen TT, Hoang VT, Nguyen TH. Epidemiology of rabies in Vietnam, 2009–2011. *Journal of Preventive Medicine*. 2013;7:29–37.
31. Nyasulu PS, Weyer J, Tschopp R, Mihret A, Aseffa A, Nuvor SV, et al. Rabies mortality and morbidity associated with animal bites in Africa: A case for integrated rabies disease surveillance, prevention and control: A scoping review. Vol. 11, *BMJ Open*. BMJ Publishing Group; 2021.
32. Acharya KP, Subedi D, Wilson RT. Rabies control in South Asia requires a One Health approach. *One Health*. 2021 Jun 1;12(100215).
33. Liu Q, Wang X, Liu B, Gong Y, Mkandawire N, Li W, et al. Improper wound treatment and delay of rabies post-exposure prophylaxis of animal bite victims in China: Prevalence and determinants. *PLoS Neglected Tropical Diseases*. 2017 Jul 10;11(7).
34. World Health Organization. Rabies vaccines WHO Position Paper. *Weekly Epidemiological Record = Relevé épidémiologique hebdomadaire*. 2007;82(49–50):425–36.
35. Center for Disease Control and Prevention. Human Rabies [Internet]. 2021 [cited 2022 Mar 21]. Available from: [https://www.cdc.gov/rabies/location/usa/surveillance/human\\_rabies.html](https://www.cdc.gov/rabies/location/usa/surveillance/human_rabies.html)
36. Léchenne M, Miranda ME, Zinsstag J., Schelling E, Waltner-Toews D, Whittaker M. Integrated rabies control. In: *One Health: The Theory and Practice of Integrated Health Approaches*. CAB International; 2015. p. 176–89.
37. OIE SRR-SEA. OIE World Organisation for Animal Health, OIE Sub-Regional Representation for South-East Asia (OIE SRR-SEA): ASEAN rabies elimination strategy. 2016 Dec.
38. Belotto A, Leanes LF, Schneider MC, Tamayo H, Correa E. Overview of rabies in the Americas. *Virus Research*. 2005 Jul 1;111(1):5–12.
39. Birhane MG, Elizabeth Miranda MG, Dyer JL, Blanton JD, Recuenco S. Willingness to Pay for Dog Rabies Vaccine and Registration in Ilocos Norte, Philippines. *PLoS Neglected Tropical Diseases*. 2012;10(3).
40. Lembo T, Attlan M, Bourhy H, Cleaveland S, Costa P, de Balogh K, et al. Renewed global partnerships and redesigned roadmaps for rabies prevention and control. *Veterinary Medicine International*. 2011 Oct;2011.

Figures 1: Search PRISMA flowchart for Systematic Review of Rabies in SEA

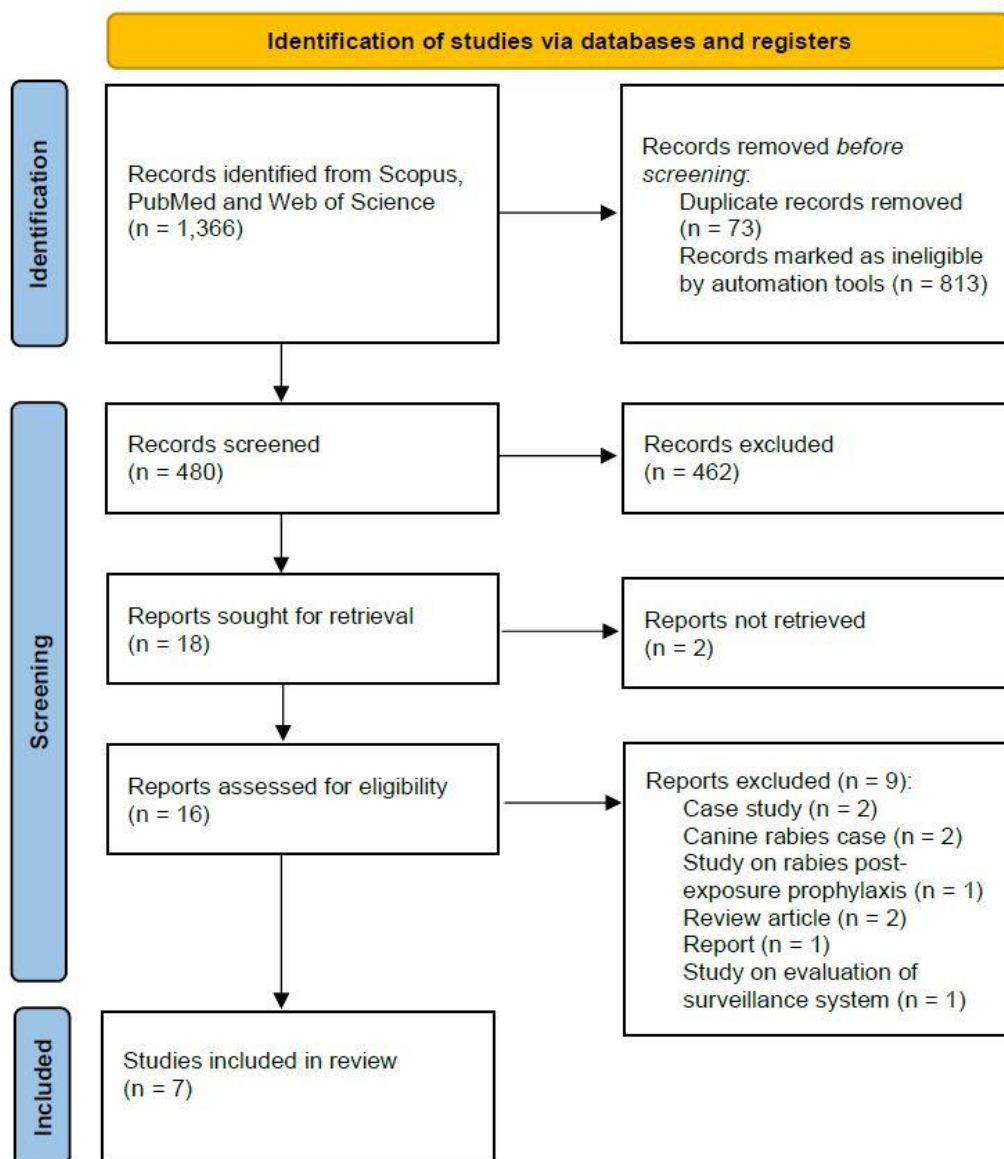

# Reporting checklist for the systematic review of Rabies in South East Asia.

Based on the PRISMA guidelines.

## Instructions to authors

Complete this checklist by entering the page numbers from your manuscript where readers will find each of the items listed below.

Your article may not currently address all the items on the checklist. Please modify your text to include the missing information. If you are certain that an item does not apply, please write "n/a" and provide a short explanation.

Upload your completed checklist as an extra file when you submit to a journal.

In your methods section, say that you used the PRISMA reporting guidelines, and cite them as:

Page MJ, McKenzie JE, Bossuyt PM, Boutron I, Hoffmann TC, Mulrow CD, Shamseer L, Tetzlaff JM, Akl EA, Brennan SE, Chou R, Glanville J, Grimshaw JM, Hróbjartsson A, Lalu MM, Li T, Loder EW, Mayo-Wilson E, McDonald S, McGuinness LA, Stewart LA, Thomas J, Tricco AC, Welch VA, Whiting P, Moher D. The PRISMA 2020 statement: An updated guideline for reporting systematic reviews

|              | Reporting Item                                                | Page Number |
|--------------|---------------------------------------------------------------|-------------|
| <b>Title</b> |                                                               |             |
| Title        | <a href="#">#1</a> Identify the report as a systematic review | 1           |

## Abstract

|    |                      |                    |                                                                |     |
|----|----------------------|--------------------|----------------------------------------------------------------|-----|
| 1  | Abstract             | <a href="#">#2</a> | Report an abstract addressing each item in the PRISMA          | 1-2 |
| 2  |                      |                    |                                                                |     |
| 3  |                      |                    | 2020 for Abstracts checklist                                   |     |
| 4  |                      |                    |                                                                |     |
| 5  |                      |                    |                                                                |     |
| 6  | <b>Introduction</b>  |                    |                                                                |     |
| 7  |                      |                    |                                                                |     |
| 8  |                      |                    |                                                                |     |
| 9  |                      |                    |                                                                |     |
| 10 | Background/rationale | <a href="#">#3</a> | Describe the rationale for the review in the context of        | 3   |
| 11 |                      |                    | existing knowledge                                             |     |
| 12 |                      |                    |                                                                |     |
| 13 |                      |                    |                                                                |     |
| 14 |                      |                    |                                                                |     |
| 15 | Objectives           | <a href="#">#4</a> | Provide an explicit statement of the objective(s) or           | 4   |
| 16 |                      |                    | question(s) the review addresses                               |     |
| 17 |                      |                    |                                                                |     |
| 18 |                      |                    |                                                                |     |
| 19 |                      |                    |                                                                |     |
| 20 | <b>Methods</b>       |                    |                                                                |     |
| 21 |                      |                    |                                                                |     |
| 22 |                      |                    |                                                                |     |
| 23 | Eligibility criteria | <a href="#">#5</a> | Specify the inclusion and exclusion criteria for the review    | 6   |
| 24 |                      |                    | and how studies were grouped for the syntheses                 |     |
| 25 |                      |                    |                                                                |     |
| 26 |                      |                    |                                                                |     |
| 27 |                      |                    |                                                                |     |
| 28 |                      |                    |                                                                |     |
| 29 | Information sources  | <a href="#">#6</a> | Specify all databases, registers, websites, organisations,     | 5-6 |
| 30 |                      |                    | reference lists, and other sources searched or consulted to    |     |
| 31 |                      |                    | identify studies. Specify the date when each source was        |     |
| 32 |                      |                    | last searched or consulted                                     |     |
| 33 |                      |                    |                                                                |     |
| 34 |                      |                    |                                                                |     |
| 35 |                      |                    |                                                                |     |
| 36 |                      |                    |                                                                |     |
| 37 |                      |                    |                                                                |     |
| 38 |                      |                    |                                                                |     |
| 39 | Search strategy      | <a href="#">#7</a> | Present the full search strategies for all databases,          | 5-6 |
| 40 |                      |                    | registers, and websites, including any filters and limits used |     |
| 41 |                      |                    |                                                                |     |
| 42 |                      |                    |                                                                |     |
| 43 |                      |                    |                                                                |     |
| 44 | Selection process    | <a href="#">#8</a> | Specify the methods used to decide whether a study met         | 5-6 |
| 45 |                      |                    | the inclusion criteria of the review, including how many       |     |
| 46 |                      |                    | reviewers screened each record and each report retrieved,      |     |
| 47 |                      |                    | whether they worked independently, and, if applicable,         |     |
| 48 |                      |                    | details of automation tools used in the process                |     |
| 49 |                      |                    |                                                                |     |
| 50 |                      |                    |                                                                |     |
| 51 |                      |                    |                                                                |     |
| 52 |                      |                    |                                                                |     |
| 53 |                      |                    |                                                                |     |
| 54 |                      |                    |                                                                |     |
| 55 |                      |                    |                                                                |     |
| 56 | Data collection      | <a href="#">#9</a> | Specify the methods used to collect data from reports,         | 5-6 |
| 57 |                      |                    |                                                                |     |
| 58 |                      |                    |                                                                |     |
| 59 |                      |                    |                                                                |     |
| 60 |                      |                    |                                                                |     |

|    |                    |                      |                                                               |     |
|----|--------------------|----------------------|---------------------------------------------------------------|-----|
| 1  | process            |                      | including how many reviewers collected data from each         |     |
| 2  |                    |                      | report, whether they worked independently, any processes      |     |
| 3  |                    |                      | for obtaining or confirming data from study investigators,    |     |
| 4  |                    |                      | and, if applicable, details of automation tools used in the   |     |
| 5  |                    |                      | process                                                       |     |
| 6  |                    |                      |                                                               |     |
| 7  |                    |                      |                                                               |     |
| 8  |                    |                      |                                                               |     |
| 9  |                    |                      |                                                               |     |
| 10 |                    |                      |                                                               |     |
| 11 |                    |                      |                                                               |     |
| 12 | Data items         | <a href="#">#10a</a> | List and define all outcomes for which data were sought.      | 5-6 |
| 13 |                    |                      | Specify whether all results that were compatible with each    |     |
| 14 |                    |                      | outcome domain in each study were sought (for example,        |     |
| 15 |                    |                      | for all measures, time points, analyses), and, if not, the    |     |
| 16 |                    |                      | methods used to decide which results to collect               |     |
| 17 |                    |                      |                                                               |     |
| 18 |                    |                      |                                                               |     |
| 19 |                    |                      |                                                               |     |
| 20 |                    |                      |                                                               |     |
| 21 |                    |                      |                                                               |     |
| 22 |                    |                      |                                                               |     |
| 23 |                    |                      |                                                               |     |
| 24 | Data items         | <a href="#">#10b</a> | List and define all other variables for which data were       | 5-6 |
| 25 |                    |                      | sought (such as participant and intervention characteristics, |     |
| 26 |                    |                      | funding sources). Describe any assumptions made about         |     |
| 27 |                    |                      | any missing or unclear information                            |     |
| 28 |                    |                      |                                                               |     |
| 29 |                    |                      |                                                               |     |
| 30 |                    |                      |                                                               |     |
| 31 |                    |                      |                                                               |     |
| 32 |                    |                      |                                                               |     |
| 33 |                    |                      |                                                               |     |
| 34 | Study risk of bias | <a href="#">#11</a>  | Specify the methods used to assess risk of bias in the        | 18  |
| 35 | assessment         |                      | included studies, including details of the tool(s) used, how  |     |
| 36 |                    |                      | many reviewers assessed each study and whether they           |     |
| 37 |                    |                      | worked independently, and, if applicable, details of          |     |
| 38 |                    |                      | automation tools used in the process                          |     |
| 39 |                    |                      |                                                               |     |
| 40 |                    |                      |                                                               |     |
| 41 |                    |                      |                                                               |     |
| 42 |                    |                      |                                                               |     |
| 43 |                    |                      |                                                               |     |
| 44 |                    |                      |                                                               |     |
| 45 |                    |                      |                                                               |     |
| 46 | Effect measures    | <a href="#">#12</a>  | Specify for each outcome the effect measure(s) (such as       | 8   |
| 47 |                    |                      | risk ratio, mean difference) used in the synthesis or         |     |
| 48 |                    |                      | presentation of results                                       |     |
| 49 |                    |                      |                                                               |     |
| 50 |                    |                      |                                                               |     |
| 51 |                    |                      |                                                               |     |
| 52 |                    |                      |                                                               |     |
| 53 |                    |                      |                                                               |     |
| 54 | Synthesis methods  | <a href="#">#13a</a> | Describe the processes used to decide which studies were      | 6   |
| 55 |                    |                      | eligible for each synthesis (such as tabulating the study     |     |
| 56 |                    |                      |                                                               |     |
| 57 |                    |                      |                                                               |     |
| 58 |                    |                      |                                                               |     |
| 59 |                    |                      |                                                               |     |
| 60 |                    |                      |                                                               |     |

|    |                      |                                                                                |    |
|----|----------------------|--------------------------------------------------------------------------------|----|
| 1  |                      | intervention characteristics and comparing against the                         |    |
| 2  |                      | planned groups for each synthesis (item #5))                                   |    |
| 3  |                      |                                                                                |    |
| 4  |                      |                                                                                |    |
| 5  |                      |                                                                                |    |
| 6  | Synthesis methods    | <a href="#">#13b</a> Describe any methods required to prepare the data for     | 6  |
| 7  |                      | presentation or synthesis, such as handling of missing                         |    |
| 8  |                      | summary statistics or data conversions                                         |    |
| 9  |                      |                                                                                |    |
| 10 |                      |                                                                                |    |
| 11 |                      |                                                                                |    |
| 12 |                      |                                                                                |    |
| 13 | Synthesis methods    | <a href="#">#13c</a> Describe any methods used to tabulate or visually display | 6  |
| 14 |                      | results of individual studies and syntheses                                    |    |
| 15 |                      |                                                                                |    |
| 16 |                      |                                                                                |    |
| 17 |                      |                                                                                |    |
| 18 |                      |                                                                                |    |
| 19 | Synthesis methods    | <a href="#">#13d</a> Describe any methods used to synthesise results and       | 6  |
| 20 |                      | provide a rationale for the choice(s). If meta-analysis was                    |    |
| 21 |                      | performed, describe the model(s), method(s) to identify the                    |    |
| 22 |                      | presence and extent of statistical heterogeneity, and                          |    |
| 23 |                      | software package(s) used                                                       |    |
| 24 |                      |                                                                                |    |
| 25 |                      |                                                                                |    |
| 26 |                      |                                                                                |    |
| 27 |                      |                                                                                |    |
| 28 |                      |                                                                                |    |
| 29 |                      |                                                                                |    |
| 30 |                      |                                                                                |    |
| 31 | Synthesis methods    | <a href="#">#13e</a> Describe any methods used to explore possible causes of   | 6  |
| 32 |                      | heterogeneity among study results (such as subgroup                            |    |
| 33 |                      | analysis, meta-regression)                                                     |    |
| 34 |                      |                                                                                |    |
| 35 |                      |                                                                                |    |
| 36 |                      |                                                                                |    |
| 37 |                      |                                                                                |    |
| 38 |                      |                                                                                |    |
| 39 | Synthesis methods    | <a href="#">#13f</a> Describe any sensitivity analyses conducted to assess     | 6  |
| 40 |                      | robustness of the synthesised results                                          |    |
| 41 |                      |                                                                                |    |
| 42 |                      |                                                                                |    |
| 43 |                      |                                                                                |    |
| 44 | Reporting bias       | <a href="#">#14</a> Describe any methods used to assess risk of bias due to    | 18 |
| 45 |                      | missing results in a synthesis (arising from reporting                         |    |
| 46 | assessment           | biases)                                                                        |    |
| 47 |                      |                                                                                |    |
| 48 |                      |                                                                                |    |
| 49 |                      |                                                                                |    |
| 50 |                      |                                                                                |    |
| 51 |                      |                                                                                |    |
| 52 | Certainty assessment | <a href="#">#15</a> Describe any methods used to assess certainty (or          | 5  |
| 53 |                      | confidence) in the body of evidence for an outcome                             |    |
| 54 |                      |                                                                                |    |
| 55 |                      |                                                                                |    |
| 56 |                      |                                                                                |    |
| 57 | <b>Results</b>       |                                                                                |    |
| 58 |                      |                                                                                |    |
| 59 |                      |                                                                                |    |
| 60 |                      |                                                                                |    |

|    |                         |                      |                                                                                                             |       |
|----|-------------------------|----------------------|-------------------------------------------------------------------------------------------------------------|-------|
| 1  | Study selection         | <a href="#">#16a</a> | Describe the results of the search and selection process,                                                   | 7-10  |
| 2  |                         |                      | from the number of records identified in the search to the                                                  |       |
| 3  |                         |                      | number of studies included in the review, ideally using a                                                   |       |
| 4  |                         |                      | flow diagram ( <a href="http://www.prisma-statement.org/PRISMAStatement/FlowDiagram">http://www.prisma-</a> |       |
| 5  |                         |                      | statement.org/PRISMAStatement/FlowDiagram)                                                                  |       |
| 6  |                         |                      |                                                                                                             |       |
| 7  |                         |                      |                                                                                                             |       |
| 8  |                         |                      |                                                                                                             |       |
| 9  |                         |                      |                                                                                                             |       |
| 10 |                         |                      |                                                                                                             |       |
| 11 |                         |                      |                                                                                                             |       |
| 12 |                         |                      |                                                                                                             |       |
| 13 | Study selection         | <a href="#">#16b</a> | Cite studies that might appear to meet the inclusion criteria,                                              | 7-10  |
| 14 |                         |                      | but which were excluded, and explain why they were                                                          |       |
| 15 |                         |                      | excluded                                                                                                    |       |
| 16 |                         |                      |                                                                                                             |       |
| 17 |                         |                      |                                                                                                             |       |
| 18 |                         |                      |                                                                                                             |       |
| 19 |                         |                      |                                                                                                             |       |
| 20 |                         |                      |                                                                                                             |       |
| 21 | Study characteristics   | <a href="#">#17</a>  | Cite each included study and present its characteristics                                                    | 7-10  |
| 22 |                         |                      |                                                                                                             |       |
| 23 |                         |                      |                                                                                                             |       |
| 24 | Risk of bias in studies | <a href="#">#18</a>  | Present assessments of risk of bias for each included study                                                 | 18    |
| 25 |                         |                      |                                                                                                             |       |
| 26 |                         |                      |                                                                                                             |       |
| 27 | Results of individual   | <a href="#">#19</a>  | For all outcomes, present for each study (a) summary                                                        | 16-22 |
| 28 | studies                 |                      | statistics for each group (where appropriate) and (b) an                                                    |       |
| 29 |                         |                      | effect estimate and its precision (such as                                                                  |       |
| 30 |                         |                      | confidence/credible interval), ideally using structured tables                                              |       |
| 31 |                         |                      | or plots                                                                                                    |       |
| 32 |                         |                      |                                                                                                             |       |
| 33 |                         |                      |                                                                                                             |       |
| 34 |                         |                      |                                                                                                             |       |
| 35 |                         |                      |                                                                                                             |       |
| 36 |                         |                      |                                                                                                             |       |
| 37 |                         |                      |                                                                                                             |       |
| 38 |                         |                      |                                                                                                             |       |
| 39 | Results of syntheses    | <a href="#">#20a</a> | For each synthesis, briefly summarise the characteristics                                                   | 16-22 |
| 40 |                         |                      | and risk of bias among contributing studies                                                                 |       |
| 41 |                         |                      |                                                                                                             |       |
| 42 |                         |                      |                                                                                                             |       |
| 43 |                         |                      |                                                                                                             |       |
| 44 |                         |                      |                                                                                                             |       |
| 45 | Results of syntheses    | <a href="#">#20b</a> | Present results of all statistical syntheses conducted. If                                                  | 16-22 |
| 46 |                         |                      | meta-analysis was done, present for each the summary                                                        |       |
| 47 |                         |                      | estimate and its precision (such as confidence/credible                                                     |       |
| 48 |                         |                      | interval) and measures of statistical heterogeneity. If                                                     |       |
| 49 |                         |                      | comparing groups, describe the direction of the effect                                                      |       |
| 50 |                         |                      |                                                                                                             |       |
| 51 |                         |                      |                                                                                                             |       |
| 52 |                         |                      |                                                                                                             |       |
| 53 |                         |                      |                                                                                                             |       |
| 54 |                         |                      |                                                                                                             |       |
| 55 |                         |                      |                                                                                                             |       |
| 56 |                         |                      |                                                                                                             |       |
| 57 | Results of syntheses    | <a href="#">#20c</a> | Present results of all investigations of possible causes of                                                 | 16-22 |
| 58 |                         |                      |                                                                                                             |       |
| 59 |                         |                      |                                                                                                             |       |
| 60 |                         |                      |                                                                                                             |       |

heterogeneity among study results

|    |                          |                      |                                                                      |
|----|--------------------------|----------------------|----------------------------------------------------------------------|
| 1  |                          |                      |                                                                      |
| 2  |                          |                      |                                                                      |
| 3  |                          |                      |                                                                      |
| 4  | Results of syntheses     | <a href="#">#20d</a> | Present results of all sensitivity analyses conducted to 16-22       |
| 5  |                          |                      |                                                                      |
| 6  |                          |                      | assess the robustness of the synthesised results                     |
| 7  |                          |                      |                                                                      |
| 8  |                          |                      |                                                                      |
| 9  | Risk of reporting        | <a href="#">#21</a>  | Present assessments of risk of bias due to missing results 16-22     |
| 10 |                          |                      |                                                                      |
| 11 | biases in syntheses      |                      | (arising from reporting biases) for each synthesis assessed          |
| 12 |                          |                      |                                                                      |
| 13 |                          |                      |                                                                      |
| 14 | Certainty of evidence    | <a href="#">#22</a>  | Present assessments of certainty (or confidence) in the 16-22        |
| 15 |                          |                      |                                                                      |
| 16 |                          |                      | body of evidence for each outcome assessed                           |
| 17 |                          |                      |                                                                      |
| 18 |                          |                      |                                                                      |
| 19 | <b>Discussion</b>        |                      |                                                                      |
| 20 |                          |                      |                                                                      |
| 21 |                          |                      |                                                                      |
| 22 |                          |                      |                                                                      |
| 23 | Results in context       | <a href="#">#23a</a> | Provide a general interpretation of the results in the context 10-12 |
| 24 |                          |                      |                                                                      |
| 25 |                          |                      | of other evidence                                                    |
| 26 |                          |                      |                                                                      |
| 27 |                          |                      |                                                                      |
| 28 | Limitations of included  | <a href="#">#23b</a> | Discuss any limitations of the evidence included in the 2            |
| 29 | studies                  |                      | review                                                               |
| 30 |                          |                      |                                                                      |
| 31 |                          |                      |                                                                      |
| 32 |                          |                      |                                                                      |
| 33 | Limitations of the       | <a href="#">#23c</a> | Discuss any limitations of the review processes used 2               |
| 34 |                          |                      |                                                                      |
| 35 | review methods           |                      |                                                                      |
| 36 |                          |                      |                                                                      |
| 37 |                          |                      |                                                                      |
| 38 |                          |                      |                                                                      |
| 39 | Implications             | <a href="#">#23d</a> | Discuss implications of the results for practice, policy, and 13-15  |
| 40 |                          |                      |                                                                      |
| 41 |                          |                      | future research                                                      |
| 42 |                          |                      |                                                                      |
| 43 |                          |                      |                                                                      |
| 44 | <b>Other information</b> |                      |                                                                      |
| 45 |                          |                      |                                                                      |
| 46 |                          |                      |                                                                      |
| 47 | Registration and         | <a href="#">#24a</a> | Provide registration information for the review, including 15        |
| 48 |                          |                      |                                                                      |
| 49 | protocol                 |                      | register name and registration number, or state that the             |
| 50 |                          |                      |                                                                      |
| 51 |                          |                      | review was not registered                                            |
| 52 |                          |                      |                                                                      |
| 53 |                          |                      |                                                                      |
| 54 |                          |                      |                                                                      |
| 55 | Registration and         | <a href="#">#24b</a> | Indicate where the review protocol can be accessed, or 15            |
| 56 |                          |                      |                                                                      |
| 57 | protocol                 |                      | state that a protocol was not prepared                               |
| 58 |                          |                      |                                                                      |
| 59 |                          |                      |                                                                      |
| 60 |                          |                      |                                                                      |



|    |                       |                      |                                                            |       |
|----|-----------------------|----------------------|------------------------------------------------------------|-------|
| 1  | Registration and      | <a href="#">#24c</a> | Describe and explain any amendments to information         | N/A   |
| 2  |                       |                      |                                                            |       |
| 3  | protocol              |                      | provided at registration or in the protocol                |       |
| 4  |                       |                      |                                                            |       |
| 5  |                       |                      |                                                            |       |
| 6  | Support               | <a href="#">#25</a>  | Describe sources of financial or non-financial support for | 15    |
| 7  |                       |                      | the review, and the role of the funders or sponsors in the |       |
| 8  |                       |                      | review                                                     |       |
| 9  |                       |                      |                                                            |       |
| 10 |                       |                      |                                                            |       |
| 11 |                       |                      |                                                            |       |
| 12 |                       |                      |                                                            |       |
| 13 |                       |                      |                                                            |       |
| 14 | Competing interests   | <a href="#">#26</a>  | Declare any competing interests of review authors          | 15    |
| 15 |                       |                      |                                                            |       |
| 16 |                       |                      |                                                            |       |
| 17 | Availability of data, | <a href="#">#27</a>  | Report which of the following are publicly available and   | 16-22 |
| 18 | code, and other       |                      | where they can be found: template data collection forms;   |       |
| 19 |                       |                      | data extracted from included studies; data used for all    |       |
| 20 | materials             |                      | analyses; analytic code; any other materials used in the   |       |
| 21 |                       |                      | review                                                     |       |
| 22 |                       |                      |                                                            |       |
| 23 |                       |                      |                                                            |       |
| 24 |                       |                      |                                                            |       |
| 25 |                       |                      |                                                            |       |
| 26 |                       |                      |                                                            |       |
| 27 |                       |                      |                                                            |       |
| 28 |                       |                      |                                                            |       |

29 None The PRISMA checklist is distributed under the terms of the Creative Commons Attribution  
 30 License CC-BY. This checklist can be completed online using <https://www.goodreports.org/>, a tool  
 31 made by the [EQUATOR Network](#) in collaboration with [Penelope.ai](#)  
 32  
 33  
 34  
 35  
 36  
 37  
 38  
 39  
 40  
 41  
 42  
 43  
 44  
 45  
 46  
 47  
 48  
 49  
 50  
 51  
 52  
 53  
 54  
 55  
 56  
 57  
 58  
 59  
 60

# BMJ Open

## Rabies in Southeast Asia: a systematic review of its incidence, risk factors, and mortality

|                                 |                                                                                                                                                                                                                                                                                                                                                                                                                                                                                                                                                                                                                                                                                                                                                                                                                                                                                                   |
|---------------------------------|---------------------------------------------------------------------------------------------------------------------------------------------------------------------------------------------------------------------------------------------------------------------------------------------------------------------------------------------------------------------------------------------------------------------------------------------------------------------------------------------------------------------------------------------------------------------------------------------------------------------------------------------------------------------------------------------------------------------------------------------------------------------------------------------------------------------------------------------------------------------------------------------------|
| Journal:                        | <i>BMJ Open</i>                                                                                                                                                                                                                                                                                                                                                                                                                                                                                                                                                                                                                                                                                                                                                                                                                                                                                   |
| Manuscript ID                   | bmjopen-2022-066587.R1                                                                                                                                                                                                                                                                                                                                                                                                                                                                                                                                                                                                                                                                                                                                                                                                                                                                            |
| Article Type:                   | Original research                                                                                                                                                                                                                                                                                                                                                                                                                                                                                                                                                                                                                                                                                                                                                                                                                                                                                 |
| Date Submitted by the Author:   | 05-Mar-2023                                                                                                                                                                                                                                                                                                                                                                                                                                                                                                                                                                                                                                                                                                                                                                                                                                                                                       |
| Complete List of Authors:       | Ling, Miaw Yn; Universiti Kebangsaan Malaysia, Department of Community Health<br>Halim, Ahmad Farid Nazmi Abdul; Universiti Kebangsaan Malaysia, Department of Community Health<br>Ahmad, Dzulfitee; Universiti Kebangsaan Malaysia, Department of Community Health<br>Ramly, Nurfatehar; Universiti Kebangsaan Malaysia, Department of Community Health<br>Hassan, Mohd Rohaizat; Universiti Kebangsaan Malaysia, Department of Community Health; Universiti Malaysia Sabah, Borneo Medical and Health Research Centre<br>Syed Abdul Rahim, Syed Sharizman; Universiti Malaysia Sabah, Department of Public Health Medicine<br>Saffree Jeffree, Mohammad ; Universiti Malaysia Sabah, Department of Public Health Medicine<br>Omar, Azizan; Universiti Malaysia Sabah, Department of Public Health Medicine<br>Hidrus, Aizuddin; Universiti Malaysia Sabah, Department of Public Health Medicine |
| <b>Primary Subject Heading</b>: | Public health                                                                                                                                                                                                                                                                                                                                                                                                                                                                                                                                                                                                                                                                                                                                                                                                                                                                                     |
| Secondary Subject Heading:      | Infectious diseases, Epidemiology                                                                                                                                                                                                                                                                                                                                                                                                                                                                                                                                                                                                                                                                                                                                                                                                                                                                 |
| Keywords:                       | Epidemiology < TROPICAL MEDICINE, EPIDEMIOLOGY, Public health < INFECTIOUS DISEASES, Systematic Review                                                                                                                                                                                                                                                                                                                                                                                                                                                                                                                                                                                                                                                                                                                                                                                            |
|                                 |                                                                                                                                                                                                                                                                                                                                                                                                                                                                                                                                                                                                                                                                                                                                                                                                                                                                                                   |

SCHOLARONE™  
Manuscripts



I, the Submitting Author has the right to grant and does grant on behalf of all authors of the Work (as defined in the below author licence), an exclusive licence and/or a non-exclusive licence for contributions from authors who are: i) UK Crown employees; ii) where BMJ has agreed a CC-BY licence shall apply, and/or iii) in accordance with the terms applicable for US Federal Government officers or employees acting as part of their official duties; on a worldwide, perpetual, irrevocable, royalty-free basis to BMJ Publishing Group Ltd ("BMJ") its licensees and where the relevant Journal is co-owned by BMJ to the co-owners of the Journal, to publish the Work in this journal and any other BMJ products and to exploit all rights, as set out in our [licence](#).

The Submitting Author accepts and understands that any supply made under these terms is made by BMJ to the Submitting Author unless you are acting as an employee on behalf of your employer or a postgraduate student of an affiliated institution which is paying any applicable article publishing charge ("APC") for Open Access articles. Where the Submitting Author wishes to make the Work available on an Open Access basis (and intends to pay the relevant APC), the terms of reuse of such Open Access shall be governed by a Creative Commons licence – details of these licences and which [Creative Commons](#) licence will apply to this Work are set out in our licence referred to above.

Other than as permitted in any relevant BMJ Author's Self Archiving Policies, I confirm this Work has not been accepted for publication elsewhere, is not being considered for publication elsewhere and does not duplicate material already published. I confirm all authors consent to publication of this Work and authorise the granting of this licence.

1  
2  
3  
4  
5  
6  
7  
8  
9  
10  
11  
12  
13  
14  
15  
16  
17  
18  
19  
20  
21  
22  
23  
24  
25  
26  
27  
28  
29  
30  
31  
32  
33  
34  
35  
36  
37  
38  
39  
40  
41  
42  
43  
44  
45  
46  
47  
48  
49  
50  
51  
52  
53  
54  
55  
56  
57  
58  
59  
60

# 1 Rabies in Southeast Asia: a systematic review of its incidence, risk factors, and 2 mortality

3 Jane Ling Miaw Yn<sup>1</sup>, Ahmad Farid Nazmi Abdul Halim<sup>1</sup>, Dzulfitee Ahmad<sup>1</sup>, Nurfatehar Ramly<sup>1</sup>,  
4 \*Mohd Rohaizat Hassan<sup>1,3</sup>, Syed Sharizman Syed Abdul Rahim<sup>2</sup>, Mohammad Saffree Jeffree<sup>2</sup>,  
5 Azizan Omar<sup>2</sup>, \*Aizuddin Hidrus<sup>2</sup>

6  
7 <sup>1</sup>*Department of Community Health, Faculty of Medicine, Universiti Kebangsaan Malaysia,*  
8 *Bandar Tun Razak, Kuala Lumpur, Malaysia*

9 <sup>2</sup>*Department of Public Health Medicine, Faculty of Medicine and Health Sciences, Universiti*  
10 *Malaysia Sabah*

11 <sup>3</sup>*Borneo Medical & Health Research Centre, Faculty of Medicine and Health Sciences,*  
12 *Universiti Malaysia Sabah, Kota Kinabalu, Sabah, Malaysia*

13  
14 \*Correspondence:

15 1. Aizuddin Hidrus, Department of Public Health Medicine, Faculty of Medicine and Health  
16 Sciences, Universiti Malaysia Sabah; Tel: +6088 320000; Email: [aizuddin88@ums.edu.my](mailto:aizuddin88@ums.edu.my)

17 2. Mohd Rohaizat Hassan, Department of Community Health, Faculty of Medicine, Universiti  
18 Kebangsaan Malaysia; Email: [rohaizat@ppukm.ukm.edu.my](mailto:rohaizat@ppukm.ukm.edu.my)

## 20 Abstract

21 **Objective** Rabies is a neglected zoonotic disease that can infect all mammals, including  
22 humans. We aimed to summarize current knowledge on the incidence, risk factors, and  
23 mortality of rabies in Southeast Asia.

1  
2  
3 24 **Design** Systematic review based on the Preferred Reporting Items for Systematic Reviews and  
4  
5  
6 25 Meta Analyses (PRISMA) 2020.

7  
8 26 **Data sources** Scopus, Web of Science, and PubMed were searched through to 21 February  
9  
10 27 2023.

11  
12  
13 28 **Eligibility criteria** We included original English language articles published between 2012 and  
14  
15 29 2023.

16  
17  
18 30 **Data extraction and synthesis** Nine independent reviewers extracted data and assessed the  
19  
20 31 risk of bias. Quality appraisal of included articles was carried out using the Mixed Method  
21  
22 32 Appraisal Tool (MMAT).

23  
24  
25 33 **Results** A total of 8 articles were included in this analysis. In Vietnam, the incidence of rabies  
26  
27 34 ranged from 1.7 to 117.2 per 100,000 population. The cumulative incidence in Sarawak was  
28  
29 35 estimated at 1.7 per 100,000 population. In Indonesia, 104 human rabies cases were reported  
30  
31 36 from 2008 to 2010, while a total of 46 rabies cases were reported in Thailand from 2010 to  
32  
33 37 2015. In Philippine, the incidence of rabies ranged between 0.1 to 0.3 per 100,000 population.  
34  
35 38 Increased risk of rabies virus infection was associated with high population density, illiteracy,  
36  
37 39 seasonal patterns as well as among dog butchers. The case-fatality rate was 100%.

38  
39  
40 40 **Conclusion** This study includes research from Southeast Asia, which may not represent rabies  
41  
42 41 infection on other regions or continents. The role of publication bias should be acknowledged  
43  
44 42 as we did not include grey literature. The presence of rabies cases in Southeast Asia is due to  
45  
46 43 a high number of unvaccinated stray and pet dogs, working hazards (dog butcher in Vietnam),  
47  
48 44 the unavailability of rabies vaccine in rural regions, and misinformation about the significance  
49  
50 45 of seeking treatment after dog bites.

51  
52 46 **Keywords** Rabies, dog bite, zoonotic disease, epidemiology, Southeast Asia

53  
54  
55 47 **Strengths and limitations**

- 1  
2  
3 48 • This study only includes research from Southeast Asia, which may not represent rabies  
4  
5  
6 49 infection in other regions or continents.  
7  
8 50 •  
9  
10  
11 51 • We did not include grey literature or national guidelines, which could have been useful  
12  
13 52 in this study.  
14  
15  
16 53 • This systematic review followed the PRISMA 2020 statement for the reporting of  
17  
18 54 systematic reviews to ensure reporting quality.  
19  
20  
21  
22  
23  
24  
25  
26  
27  
28  
29  
30  
31  
32  
33  
34  
35  
36  
37  
38  
39  
40  
41  
42  
43  
44  
45  
46  
47  
48  
49  
50  
51  
52  
53  
54  
55  
56  
57  
58  
59  
60

## 55 Introduction

56 Rabies is a neglected zoonotic disease that is caused by an RNA virus from the family of  
57 *Rhabdoviridae*, genus *Lyssavirus*[1]. Once clinical symptoms appear, rabies is almost 100%  
58 fatal [2]. All mammals can be infected with the rabies virus, including humans. More than  
59 99% of human rabies cases are transmitted via dogs [3]. With the necessary evidence and  
60 tools in place for control and elimination of rabies, canine rabies can be eliminated, as  
61 demonstrated in Western Europe, Canada, the United States of America (USA), Japan, a few  
62 Latin American countries, and many parts in Asia. However, rabies is still widespread,  
63 occurring in more than 80 countries, particularly in the developing countries in Africa and Asia  
64 [3, 4]. Furthermore, half of the global population lives in canine rabies-endemic areas hence  
65 is at risk of contracting rabies [3].

66 Globally, canine rabies was estimated to cause approximately 59,000 human deaths  
67 annually. Rabies is clearly a major problem in Asia. The number of human deaths due to rabies  
68 in Asia is higher than in any other region in the world. Most human rabies deaths occurred in  
69 Asia (59.6%), followed by Africa (36.4%), while only less than 0.05% of human rabies deaths  
70 occurred in the Americas. Additionally, India alone accounts for 35% of global human rabies  
71 deaths, which was higher than any other country ([4]. In Asia, canine rabies was estimated to  
72 cause a loss of 2.2 million Disability-Adjusted Life Years (DALYs) per year, while the annual  
73 cost of post-exposure prophylaxis (PEP) was highest in Asia, with estimates up to US\$ 1.5  
74 billion[5].

75 In Southeast Asia, only Singapore has eradicated canine rabies through the  
76 implementation of robust national rabies control programs, while other countries in this  
77 subregion were not considered to be rabies-free [6]. Malaysia was once declared to be rabies-  
78 free by the World Animal Health Organisation in July 2013, but several rabies outbreaks since

1  
2  
3 79 2015 have relegated Malaysia down from its rabies-free status [7]. Even though Thailand and  
4  
5  
6 80 Vietnam have not been able to eliminate rabies, there was a substantial reduction of human  
7  
8 81 rabies deaths through the implementation of dog mass vaccination, intensified post-exposure  
9  
10 82 prophylaxis in humans, and awareness education [8].

13 83 Rabies is 100 percent preventable through vaccination in animals and humans [9]. The  
14  
15 84 World Health Organization (WHO) recommended pre-exposure prophylaxis (PrEP) for those  
16  
17 85 with continual, frequent, or increased risk of exposure to rabies virus (e.g., veterinarians,  
18  
19 86 animal handlers). If exposed to a rabid animal, the WHO recommended PEP, which consists  
20  
21 87 of immediate wound management, immediate vaccination, as well as administration of rabies  
22  
23 88 immunoglobulin for high-risk exposure [10]. Nevertheless, dog vaccination is considered the  
24  
25 89 most cost-effective strategy for preventing rabies in humans [2].

30 90 Despite the availability of evidence and guidelines for the control and management of  
31  
32 91 rabies, there are some constraints faced by countries in Southeast Asia in controlling rabies,  
33  
34 92 including inadequate resources, lack of political commitment, lack of consensus on strategy,  
35  
36 93 weak intersectoral coordination, insensitive surveillance systems, limited accessibility to  
37  
38 94 modern rabies vaccine and supply problem, as well as lack of public awareness and  
39  
40 95 cooperation [8]. The high estimated burden for rabies more than justifies the need to  
41  
42 96 prioritize rabies control, particularly in Asian countries.

47 97 Information on rabies epidemiology is a prerequisite for effective planning of rabies  
48  
49 98 control programs. Previous systematic reviews focused on rabies epidemiology in India [11],  
50  
51 99 Nepal [1], and Arab countries [12], while literature synthesizing data regarding rabies  
52  
53 100 epidemiology in Southeast Asia are limited. Hence, this systematic review aims to provide an  
54  
55 101 in-depth assessment of the incidence, risk factors, and mortality of rabies in Southeast Asia  
56  
57 102 countries, based on the published literature.



## 103 **Materials and Methods**

104 This systematic review is reported in accordance with the Preferred Reporting Items for  
105 Systematic Reviews and Meta-Analyses (PRISMA) 2020 statement [13].

### 106 ***Patient and Public involvement***

107 No patient and/or public involvement in this study (None).

### 108 ***Research Question Formulation***

109 The review question was developed based on the CoCoPop (condition, context, population)  
110 and PEO (population, exposure, outcome) concept [14]. The PICO (population, intervention,  
111 comparison intervention, outcome measures) framework is commonly used in developing  
112 focused clinical questions for quantitative reviews [15], while the CoCoPop and PEO concepts  
113 are suitable for reviews related to prevalence and aetiology [14]. Based on the CoCoPop  
114 concept, the condition refers to the incidence of rabies, the context refers to Southeast Asia  
115 and the population is the general population. Based on the PEO concept, population refers to  
116 the general population in Southeast Asia, exposure refers to rabies and the outcome is the  
117 mortality of rabies. Hence, the main research questions are: (1) What is the incidence of rabies  
118 among the general population in Southeast Asia countries? and (2) What is the risk factors of  
119 rabies among the general population in Southeast Asia countries? (3) What is the mortality  
120 rate of rabies among the general population in Southeast Asia countries?

### 121 ***Data Source and Search Strategy***

122 PubMed, Web of Science and Scopus were searched from 1 January 2012 through to 21  
123 February 2023. The keywords used for the searching of related articles are provided in Table  
124 1.

125  
126 Table 1: Keywords search used in the screening process.

| Database       | Search string                                                                                                                                                                                                                                                                                                                                                                                                                                                                                                                                                                                                                                                                                                                                                                                                                                                                                                                                           |
|----------------|---------------------------------------------------------------------------------------------------------------------------------------------------------------------------------------------------------------------------------------------------------------------------------------------------------------------------------------------------------------------------------------------------------------------------------------------------------------------------------------------------------------------------------------------------------------------------------------------------------------------------------------------------------------------------------------------------------------------------------------------------------------------------------------------------------------------------------------------------------------------------------------------------------------------------------------------------------|
| Scopus         | <p>1) TITLE-ABS-KEY(("rabies*" OR "rabies virus*" OR "dog bite*") AND ("Southeast Asia" OR "Brunei" OR "Myanmar" OR "Cambodia" OR "Timor-Leste" OR "Indonesia" OR "Laos" OR "Malaysia" OR "Philippines" OR "Singapore" OR "Thailand" OR "Vietnam") AND ("epidemiology" OR "outbreak" OR "case" OR "prevalence" OR "incidence" OR "causes" OR "risk factor"))</p> <p>2) TITLE-ABS-KEY(("Rabies*" OR "Rabies virus*" OR "dog bite*") AND ("Southeast Asia" OR "Brunei" OR "Myanmar" OR "Cambodia" OR "Timor-Leste" OR "Indonesia" OR "Laos" OR "Malaysia" OR "Philippines" OR "Singapore" OR "Thailand" OR "Vietnam") AND ("mortality*" OR "death*" OR "fatality*"))</p>                                                                                                                                                                                                                                                                                  |
| Web of Science | <p>1) (((ALL=("rabies*")) OR ALL=("rabies virus*")) OR ALL=("dog bite*")) AND (((((((((((ALL=("Southeast Asia")) OR ALL=("Brunei")) OR ALL=("Myanmar")) OR ALL=("Cambodia")) OR ALL=("Timor-Leste")) OR ALL=("Indonesia")) OR ALL=("Laos")) OR ALL=("Malaysia")) OR ALL=("Philippines")) OR ALL=("Singapore")) OR ALL=("Thailand")) OR ALL=("Vietnam")) AND (((((ALL=("epidemiology")) OR ALL=("outbreak")) OR ALL=("case")) OR ALL=("prevalence")) OR ALL=("incidence")) OR ALL=("causes")) OR ALL=("risk factor"))</p> <p>2) (((ALL=("rabies*")) OR ALL=("rabies virus*")) OR ALL=("dog bite*")) AND (((((((((((ALL=("Southeast Asia")) OR ALL=("Brunei")) OR ALL=("Myanmar")) OR ALL=("Cambodia")) OR ALL=("Timor-Leste")) OR ALL=("Indonesia")) OR ALL=("Laos")) OR ALL=("Malaysia")) OR ALL=("Philippines")) OR ALL=("Singapore")) OR ALL=("Thailand")) OR ALL=("Vietnam")) AND ((ALL=("mortality*")) OR ALL=("death*")) OR ALL=("fatality*"))</p> |
| PubMed         | <p>1) (((("rabies*" OR "rabies virus*" OR "dog bite*")) AND (((((((((((("Southeast Asia" OR "Brunei") OR ("Myanmar") OR ("Cambodia") OR ("Timor-Leste") OR ("Indonesia") OR ("Laos")) OR ("Malaysia") OR ("Philippines") OR ("Singapore")) OR ("Thailand") OR ("Vietnam")) AND ((((((("epidemiology" OR "outbreak") OR "case") OR "prevalence") OR "incidence") OR "causes") OR "risk factor"))</p> <p>2) (((("rabies*" OR "rabies virus*" OR "dog bite*")) AND (((((((((((("Southeast Asia" OR "Brunei") OR ("Myanmar") OR ("Cambodia") OR ("Timor-Leste") OR ("Indonesia") OR ("Laos")) OR ("Malaysia") OR ("Philippines") OR ("Singapore")) OR ("Thailand") OR ("Vietnam")) AND (((("mortality*" OR "death*") OR "fatality*"))</p>                                                                                                                                                                                                                   |

### 128 **Study Selection**

129 The inclusion criteria were: (1) publication from 2012-2023; (2) original article; (3) publication  
130 in the English language. Studies with these characteristics were included in this review: (1)  
131 report on the incidence and risk factors of rabies in Southeast Asia; and (2) report on the  
132 mortality rate of rabies in Southeast Asia. Non-original articles such as conference  
133 proceedings, perspectives, commentary, opinion, reports, systematic reviews, and meta-  
134 analyses were excluded.

### 135 **Data Extraction and Synthesis**

136 Duplicates were deleted, and at least two reviewers re-screened the remaining papers. Before  
137 being included in the review, articles were screened in three stages. Any article that did not  
138 meet the inclusion criteria from title screening was eliminated in the first phase. The abstracts  
139 of the remaining papers were reviewed in the second phase, and any publications that did  
140 not fit our inclusion criteria were eliminated from the review. The full-text articles were  
141 examined attentively in the last phase to eliminate any papers that did not fulfil our inclusion  
142 criteria. Before the data extraction process, both reviewers must agree that the entire  
143 publications should be reviewed. Any disagreements were worked out through discussion. All  
144 data extraction was conducted independently using a standardized data extraction form  
145 which was organized using Microsoft Excel. Information collected in the form included (1)  
146 author, (2) publication year, (3) reference, (4) country, (5) study design, (6) statistical analysis,  
147 and (7) results.

### 149 **Quality Appraisal**

150 Quality appraisal was conducted by authors on all 8 studies using the Mixed Method Appraisal  
151 Tool (MMAT) [16]. The MMAT is a critical appraisal tool that is developed to appraise studies

1  
2  
3 152 included in systematic mixed study reviews. The methodology quality of five categories of  
4  
5  
6 153 studies (qualitative study, randomized control trials, non-randomized studies, quantitative  
7  
8 154 descriptive study, and mixed methods study) can be appraised using this tool. For each  
9  
10 155 category, five criteria are used to assess the quality of the study. It is advised not to calculate  
11  
12  
13 156 an overall score from the rating of each criterion using the latest version of MMAT (2018).  
14  
15 157 However, due to problems faced by researchers in reporting the MMAT results, a suggestion  
16  
17  
18 158 was provided for reporting an overall score (5\*\*\*\*\*/100% quality criteria met; 4\*\*\*\*\*/80%  
19  
20 159 quality criteria met; 3\*\*\*\*/60% quality criteria met; 2\*\*\*/40% quality criteria met; 1\*/20%  
21  
22  
23 160 quality criteria met). The details of this assessment are reported in Table 2.  
24  
25  
26  
27  
28  
29  
30  
31  
32  
33  
34  
35  
36  
37  
38  
39  
40  
41  
42  
43  
44  
45  
46  
47  
48  
49  
50  
51  
52  
53  
54  
55  
56  
57  
58  
59  
60

161

162 Table 2: The details of mixed method appraisal tool assessment

| Author                 | Type of study | Score | 1.1                                                                 | 1.2                                                    | 1.3                               | 1.4                                  | 1.5                                                                      |
|------------------------|---------------|-------|---------------------------------------------------------------------|--------------------------------------------------------|-----------------------------------|--------------------------------------|--------------------------------------------------------------------------|
|                        |               |       | Is the sampling strategy relevant to address the research question? | Is the sample representative of the target population? | Are the measurements appropriate? | Is the risk of nonresponse bias low? | Is the statistical analysis appropriate to answer the research question? |
| Nguyen et al. 2021     | Quantitative  | 40%   | Can't tell                                                          | Can't tell                                             | Yes                               | Can't tell                           | Yes                                                                      |
| Pham et al. 2021       | Quantitative  | 100%  | Yes                                                                 | Yes                                                    | Yes                               | Yes                                  | Yes                                                                      |
| Sim et al. 2021        | Quantitative  | 60%   | Yes                                                                 | Can't tell                                             | Yes                               | Can't tell                           | Yes                                                                      |
| Yurachai et al. 2021   | Quantitative  | 80%   | Yes                                                                 | Yes                                                    | Yes                               | Can't tell                           | Yes                                                                      |
| Phung et al. 2018      | Quantitative  | 80%   | Yes                                                                 | Yes                                                    | Yes                               | Can't tell                           | Yes                                                                      |
| Susilawati et al. 2012 | Quantitative  | 80%   | Yes                                                                 | Yes                                                    | Yes                               | Yes                                  | No                                                                       |
| Lee et al. 2017        | Quantitative  | 100%  | Yes                                                                 | Yes                                                    | Yes                               | Yes                                  | Yes                                                                      |
| Guzman et al.2021      | Quantitative  | 80%   | Yes                                                                 | Yes                                                    | Yes                               | No                                   | Yes                                                                      |

1  
2  
3 164  
4  
5  
6 165 **Results**  
7  
8 166 There were 1,437 records identified from the three databases to evaluate the incidence, risk  
9  
10 167 factors and mortality rate of rabies in Southeast Asia. Using automation tools, 829 records  
11  
12 168 were excluded based on year, publication type, and language. A total of 98 duplicate records  
13  
14 169 were found and removed, leaving 510 records for title screening. We screened the titles and  
15  
16 170 abstracts independently based on the review questions. A total of 491 articles were removed  
17  
18 171 during the screening. For the remaining 19 articles, the full text was retrieved for assessment  
19  
20 172 of eligibility. Disagreements were resolved through discussion to reach a consensus. 11  
21  
22 173 articles were removed as they were not according to the objective (4), not primary/original  
23  
24 174 research articles (5) and the full article could not be retrieved (2), leaving a total of 8 articles  
25  
26 175 to proceed with a quality appraisal. The PRISMA flowchart is presented in Figure 1.  
27  
28  
29  
30  
31  
32 176  
33  
34  
35 177 ***Background of the Eligible Studies***  
36  
37 178 A total of 8 studies were included in this systematic review in which 4 studies were conducted  
38  
39 179 in Vietnam, and 1 each from Indonesia, Malaysia, Thailand, and Philippine (Table 3). The  
40  
41 180 theme discussed by all studies was incidence rates, number of cases, and risk factors of rabies  
42  
43 181 in Southeast Asia. Among the included studies, 3 studies particularly discussed rabies's  
44  
45 182 mortality.  
46  
47  
48  
49  
50  
51  
52  
53  
54  
55  
56  
57  
58  
59  
60

183 Table 3: Table of evidence

| Author/year        | Country  | Reference                                                                                                                                                                                                                                                                                                                                        | Study design    | Statistical analysis                                    | Result                                                                                                                                                                                                                                                                                                 |
|--------------------|----------|--------------------------------------------------------------------------------------------------------------------------------------------------------------------------------------------------------------------------------------------------------------------------------------------------------------------------------------------------|-----------------|---------------------------------------------------------|--------------------------------------------------------------------------------------------------------------------------------------------------------------------------------------------------------------------------------------------------------------------------------------------------------|
| Nguyen et al. 2021 | Vietnam  | Nguyen, A. K. T., Vu, A. H., Nguyen, T. T., Nguyen, D. V., Ngo, G. C., Pham, T. Q., Inoue, S., et al. 2021. Risk factors and protective immunity against rabies in unvaccinated butchers working at dog slaughterhouses in Northern Vietnam. <i>American Journal of Tropical Medicine and Hygiene</i> 105(3): 788–793. doi:10.4269/ajtmh.20-1172 | Cross-sectional | Pearson correlation<br>Multivariate regression analysis | Study found that 28.3% of butchers were at risk of rabies exposure due to slaughtering sick dog, getting bitten, scratched or knife cut. Only 8.6% had NTA sufficient for protection and only 8.1% of them were vaccinated. Hence dog butchers in Vietnam were at high risk of rabies virus infection. |
| Pham et al. 2021   | Vietnam  | Pham, Q. D., Phan, L. T., Nguyen, T. P. T., Doan, Q. M. N., Nguyen, H. D., Luong, Q. C. & Nguyen, T. V. 2021. An Evaluation of the Rabies Surveillance in Southern Vietnam. <i>Frontiers in Public Health</i> 9(April): 1–9. doi:10.3389/fpubh.2021.610905                                                                                       | Cross-sectional | Descriptive<br>Chi-square test / Fisher’s exact test    | 94 human rabies cases (2009-2018) were reported in Southern Vietnam, with an average of nine cases recorded annually (2.7 cases per 10 million population). The highest number was reported in 2018. Majority of cases were male and those aged 50 years and above.                                    |
| Sim et al. 2021    | Malaysia | Sim, B. N. H., Liang, B. N. W., Ning, W. S. & Viswanathan, S. 2021. A retrospective analysis of emerging rabies: A neglected tropical disease in Sarawak, Malaysia. <i>Journal of the</i>                                                                                                                                                        | Cross-sectional | Descriptive                                             | 6 cases were identified with a mixture of MN and LMN findings. Most cases did not seek medical attention upon dog bite. The incubation period varied from 17 days to 2 years. All cases died, with 5 cases succumbing to the illness within 2 weeks of symptoms onset. The cumulative                  |

|                        |           |                                                                                                                                                                                                                                                                                                             |                 |                                                                                                               |                                                                                                                                                                                                                                                                                                                                                                                                                                                                                               |
|------------------------|-----------|-------------------------------------------------------------------------------------------------------------------------------------------------------------------------------------------------------------------------------------------------------------------------------------------------------------|-----------------|---------------------------------------------------------------------------------------------------------------|-----------------------------------------------------------------------------------------------------------------------------------------------------------------------------------------------------------------------------------------------------------------------------------------------------------------------------------------------------------------------------------------------------------------------------------------------------------------------------------------------|
|                        |           | <i>Royal College of Physicians of Edinburgh</i> 51(2): 133–139.<br>doi:10.4997/JRCPE.2021.207                                                                                                                                                                                                               |                 |                                                                                                               | incidence in Sibu was estimated at 1.7 per 100,000 population.                                                                                                                                                                                                                                                                                                                                                                                                                                |
| Yurachai et al. 2021   | Thailand  | Yurachai, O., Hinjoy, S. & Wallace, R. M. 2020. An epidemiological study of suspected rabies exposures and adherence to rabies post-exposure prophylaxis in Eastern Thailand, 2015. <i>PLoS Neglected Tropical Diseases</i> 14(2): 1–17.<br>doi:10.1371/journal.pntd.0007248                                | Cross-sectional | Descriptive                                                                                                   | 46 confirmed and probable cases of human rabies were reported in Thailand (2010 – 2015). 11 were reported from Eastern Thailand. 6,204 suspected rabies exposure reported in 8 Eastern Thailand. Children age < 15 years and elderly age > 60 years had the highest suspected reported exposure rate compared to others (189.7/100,000 and 189.2/100,000). Overall, the estimated suspected rabies exposure rate was 204/100,000.                                                             |
| Phung et al. 2018      | Vietnam   | Phung, D., Nguyen, H. X., Thi Nguyen, H. L., Luong, A. M., Do, C. M., Tran, Q. D. & Chu, C. 2018. The effects of socioecological factors on variation of communicable diseases: A multiple-disease study at the national scale of Vietnam. <i>PLoS ONE</i> 13(3): 1–14.<br>doi:10.1371/journal.pone.0193246 | Ecological      | Moran's I tests<br>Multilevel negative binomial regression model / zero-inflated negative binomial regression | The average monthly number of rabies cases is 429 from 2011 to 2015. The incidences of rabies ranged from 1.7 to 117.2 per 100,000 with higher incidences observed in Red River, South Central Coast (SCC), and the Mekong Delta regions<br><br>Climate factors: temperature, humidity and cumulative rainfall were associated with increase in rabies incidence in Vietnam.<br><br>Socio-economic factors: population density and illiteracy were sensitive factor increased risk of rabies. |
| Susilawati et al. 2012 | Indonesia | Susilawathi, N. M., Darwinata, A. E., Dwija, I. B. N. P., Budayanti, N. S., Wirasandhi, G. A. K., Subrata, K.,                                                                                                                                                                                              | Cross-sectional | Descriptive                                                                                                   | 104 human rabies cases reported in Bali during November 2008-November 2010 which all are fatal and the symptom exhibit by all patients. Almost all (92%) cases had a history                                                                                                                                                                                                                                                                                                                  |



|                   |             |                                                                                                                                                                                                                                                                                                                                                              |                 |                                         |                                                                                                                                                                                                                                                                                                                                                                                                        |
|-------------------|-------------|--------------------------------------------------------------------------------------------------------------------------------------------------------------------------------------------------------------------------------------------------------------------------------------------------------------------------------------------------------------|-----------------|-----------------------------------------|--------------------------------------------------------------------------------------------------------------------------------------------------------------------------------------------------------------------------------------------------------------------------------------------------------------------------------------------------------------------------------------------------------|
|                   |             | Susilarini, N. K., et al. 2012. Epidemiological and clinical features of human rabies cases in Bali 2008-2010. <i>BMC Infectious Diseases</i> 12(November 2008): 0–7. Doi:10.1186/1471-2334-12-81                                                                                                                                                            |                 |                                         | of dog bite. Only 5.8% had their wounds treated and received an anti-rabies vaccine (ARV) after the bite incident. The case-fatality rate was 100%.                                                                                                                                                                                                                                                    |
| Lee et al. 2017   | Vietnam     | Lee, H. S., Thiem, V. D., Anh, D. D., Duong, T. N., Lee, M., Grace, D. & Nguyen-Viet, H. 2018. Geographical and temporal patterns of rabies post exposure prophylaxis (PEP) incidence in humans in the Mekong River Delta and Southeast Central Coast regions in Vietnam from 2005 to 2015. <i>PloS ONE</i> 13(4): 1–12. Doi:10.1371/journal.pone.0194943    | Ecological      | Univariate negative binomial regression | Hotspot localities were identified in Southern Vietnam (mainly at Mekong River Delta and South-Central Coast)<br><br>MRD: strong peak in February / July<br><br>SCC: middle of the year                                                                                                                                                                                                                |
| Guzman et al.2021 | Philippines | Guzman FD, Iwamoto Y, Saito N, Salva EP, Dimaano EM, Nishizono A, et al. (2022) Clinical, epidemiological, and spatial features of human rabies cases in Metro Manila, the Philippines from 2006 to 2015. <i>PLoS Negl Trop Dis</i> 16(7): e0010595. <a href="https://doi.org/10.1371/journal.pntd.0010595">https://doi.org/10.1371/journal.pntd.0010595</a> | Cross-sectional | Descriptive                             | 575 rabies cases from 2006 to 2015. Most patients were male (70.3%) and aged 41 to 60 years (34.1%).<br><br>The incidence rate of human rabies per 100,000 population in 2007, 2010, and 2015 were 0.1305, 0.1356, and 0.1708 in the National Capital Region; 0.2890, 0.2965, and 0.1961 in Region III; and 0.1449, 0.1272, and 0.1041 in Region IV-A, respectively.<br><br>463 people died of rabies. |

1  
2  
3 1854  
5  
6 186 ***Incidence and Risk Factors of Rabies in Southeast Asia Countries***

7  
8 187 Overall, the incidence of rabies ranged between 0.1 per 100,000 population in Philippine  
9  
10 188 [17]to 117.2 per 100,000 population in Vietnam [18]. The average monthly number of rabies  
11  
12 189 cases in Vietnam is 429 during the period from 2011 to 2015, where the incidences of rabies  
13  
14 190 ranged from 1.7 to 117.2 per 100,000 with higher incidences observed in Red River, South  
15  
16 191 Central Coast (SCC), and the Mekong Delta regions [18]. Specific to Southern Vietnam, a total  
17  
18 192 of 94 human rabies cases between 2009 and 2018 were reported, with an average of nine  
19  
20 193 cases recorded annually, representing an incidence of 2.7 cases per 10 million population [19].  
21  
22 194 The highest number was reported in 2018 (5.5 cases per 10 million population). Most cases  
23  
24 195 were among males and those aged 50 years and above.

25  
26 196 Dog butchers in Vietnam were at high risk of rabies virus infection [20]. The study  
27  
28 197 found that 28.3% of butchers were at risk of rabies exposure due to slaughtering of sick dogs,  
29  
30 198 getting bitten, scratched, or knife cut. Among 406 participants, 8.6% had rabies neutralizing  
31  
32 199 antibody (NTA) sufficient for protection and only 8.1% of them were vaccinated. In terms of  
33  
34 200 location, rabies cases were limited to specific areas. Hotspots were identified in southern  
35  
36 201 Vietnam, particularly in the Mekong River Delta (MRD) and South-Central Coast (SCC) [21].  
37  
38 202 Seasonal patterns were found in which a strong peak in February/ July and a minor peak in  
39  
40 203 October/ December in the MRD Region. However, a strong peak was detected in the middle  
41  
42 204 of each year in the SCC. Temperature, humidity, and cumulative rainfall are positively  
43  
44 205 associated with an increase in incidences of rabies in Vietnam. In terms of socio-economic  
45  
46 206 factors, increases in population density, as well as the percentages of illiteracy, were sensitive  
47  
48 207 factors for elevated risk of rabies [18].  
49  
50  
51  
52  
53  
54  
55  
56  
57  
58  
59  
60

1  
2  
3 208 In Indonesia, 104 human rabies cases were reported in Bali from November 2008 to  
4  
5  
6 209 November 2010. Most of the cases were among males. Almost all (92%) cases had a history  
7  
8 210 of a dog bite. Only 5.8% had their wounds treated and received an anti-rabies vaccine (ARV)  
9  
10  
11 211 after the bite incident [22]. Even worse, rabies cases in Sibu, Sarawak did not seek medical  
12  
13 212 attention upon dog bite as well [23]. The cumulative incidence in Sibu was estimated at 1.7  
14  
15 213 per 100,000 population. The incubation period varied from 17 days to 2 years.

16  
17  
18 214 A total of 46 confirmed and probable cases of human rabies were reported in Thailand  
19  
20 215 from 2010 to 2015, in which 11 were reported from Eastern Thailand [24]. Even though rabies  
21  
22 216 can be prevented by vaccination, more than 90% of rabies death cases in Thailand did not get  
23  
24 217 or improperly stopped receiving PEP. In terms of suspected rabies exposures, 6,204 exposures  
25  
26 218 were reported from eight provinces in Eastern Thailand, resulting in a crude exposure rate of  
27  
28 219 106 reported rabies exposures per 100,000 people. Dogs were the main source of exposure  
29  
30 220 (77.8%), while children under the age of 15 and the elderly over the age of 60 had the highest  
31  
32 221 overall reported exposure rates (189.7 and 189.2/100,000, respectively).

33  
34  
35 222 In Philippines, there were 575 rabies cases from 2006 to 2015. 70% from the rabies  
36  
37 223 cases were among males. Nearly 34% from the patients aged 41 to 60 years. The incidence  
38  
39 224 rate of human rabies per 100,000 population in 2007, 2010, and 2015 were 0.1305, 0.1356,  
40  
41 225 and 0.1708 in the National Capital Region; 0.2890, 0.2965, and 0.1961 in Region III; and 0.1449,  
42  
43 226 0.1272, and 0.1041 in Region IV-A, respectively [17].  
44  
45  
46  
47  
48  
49  
50  
51  
52

### 53 227 54 228 ***Mortality of Rabies in Southeast Asia Countries***

55 229 The case-fatality rate was 100% as mentioned in 2 studies [22, 23]. Among 6 deaths reported  
56  
57 230 in Sibu, 5 succumbed to the illness within 2 weeks of symptoms onset, with total of 5 out of  
58  
59 231 6 cases reported dog bite history [23]. In Indonesia, Susilawati et al. reported that there were

1  
2  
3 232 104 fatalities due to rabies, of which 96 cases had history of dog bite [22]. In Philippine, 463  
4  
5  
6 233 people died from rabies infection [17].  
7

## 8 234 **Discussion**

### 9 10 235 ***Incidence and Risk factor of Rabies in Southeast Asia Countries.***

11  
12  
13 236 Rabies in Asia and Africa contributes to over 99% of human rabies deaths that occur in the  
14  
15 237 world today. The vast majority of 60% of these deaths are in Asia [25]. Every year, an  
16  
17  
18 238 estimated 59,000 people die from rabies worldwide, with the majority (95%) of these deaths  
19  
20 239 occurring in Africa and Asia due to a lack of post-exposure prophylaxis (PEP) services for  
21  
22  
23 240 animal-bite patients and rabies surveillance personnel and facilities [26]. This support the  
24  
25 241 result of our study which shows that there is a high number of rabies cases reported in  
26  
27  
28 242 Vietnam, Indonesia, and Thailand, which are medium endemic rabies country [27].  
29

30 243 Rabies is concentrated in Asia and Southeast Asia region because rabies is frequently  
31  
32 244 neglected when health and agriculture budgets are set although the costs and economic  
33  
34  
35 245 benefits of having rabies prevention programs have been successfully implemented in high-  
36  
37 246 income country [28]. The high number of rabies cases in Southeast Asia is also contributed by  
38  
39  
40 247 the high number of unowned, free-roaming dogs that can't be controlled without a lot of  
41  
42 248 effort and thus aren't vaccinated [29]. Vaccination programs in dogs can provide herd  
43  
44  
45 249 immunity and break the rabies transmission cycle in this reservoir species and had been  
46  
47 250 successfully applied in several countries around the world [30].  
48

49  
50 251 Another cause of high incidence of rabies in Southeast Asia is due to the working  
51  
52 252 hazard of dog butchers, especially in a country that legalizes dog consumption such as in  
53  
54 253 Vietnam [31]. It was also reported by the Centers for Disease Control and Prevention (CDC)  
55  
56  
57 254 that there is illegal trafficking of dogs for human consumption occurring in Vietnam  
58  
59 255 ([https://www.cdc.gov/globalhealth/stories/rabies\\_southeast\\_asia.htm](https://www.cdc.gov/globalhealth/stories/rabies_southeast_asia.htm)) which could possibly  
60

1  
2  
3 256 contributes to the high incidence of rabies in Vietnam. Professional dog butchers in northern  
4  
5  
6 257 Vietnam are at a high risk of rabies virus infection due to exposure during the slaughtering  
7  
8 258 process, which was from the slaughtering of sick or dead dogs, getting bitten, scratched, or  
9  
10  
11 259 knife cut. Study reported that 91.9% of professional dog butchers in Vietnam were not  
12  
13 260 vaccinated against rabies, which may be because of the fear of side effects of rabies vaccine,  
14  
15 261 inability to afford vaccination, and incorrect knowledge of rabies prevention [20].

16  
17  
18 262 The rabies incidence of 0.1 per 100,000 population in Philippine is similar to that  
19  
20 263 reported in China in 2016 [32]. The lower rabies incidence in Philippine compared to other  
21  
22 264 Southeast Asia countries may be due to the implementation of Anti-Rabies Act of 2007 to  
23  
24 265 prevent and control human rabies [33]. Additionally, the consumption of dog meat was  
25  
26 266 banned in 1998 with the implementation of Animal Welfare Act which may contribute to the  
27  
28 267 lower incidence of rabies in Philippine [34].

29  
30  
31  
32 268 In comparison to females, males are more likely to contract rabies infection [19].  
33  
34 269 Similar finding was found in Iraq, where more than 89% of the cases were among males  
35  
36 270 [35]. This can be attributed to the fact that most females are housewives, while males are  
37  
38 271 engaged in outdoor activities [36]. Another study in Ethiopia also stated that males are more  
39  
40 272 likely to do nightly and outdoor activities while females are more likely to remain indoors due  
41  
42 273 to cultural and religious reasons [37], which could explain the increase incidence of rabies in  
43  
44 274 males.

45  
46  
47  
48  
49 275 According to study by Yurachai et al, rabies infection affects children more compared  
50  
51 276 to other age group [24]. This corresponds to the WHO report, which states that 40% of rabies  
52  
53 277 victims are children ages 4 to 15 (<https://www.who.int/news-room/fact-sheets/detail/rabies>).  
54  
55 278 Similar finding was found in other studies in Yemen and Iran where nearly 40% of individual  
56  
57 279 exposed to rabies infection fall in this age group [35, 38]. Children in this age group are  
58  
59  
60

1  
2  
3 280 probably more likely to play with, annoy, or approach the biting animals, which contributes  
4  
5  
6 281 to the higher rate of bites in this age group [35]. In contrast, according to a study from Pham  
7  
8 282 et al, older people are more likely to become infected with rabies [19].  
9

10 283 In several studies included in this systematic review, the diagnosis of most rabies cases  
11  
12  
13 284 was based only on detailed history and clinical diagnosis [17, 19, 21]. To diagnose rabies in  
14  
15 285 humans, multiple tests are required such as saliva, serum, spinal fluid, and skin biopsies of  
16  
17  
18 286 hair follicles from the nape of the neck are analysed. Viral isolation or reverse transcription  
19  
20 287 followed by polymerase chain reaction can be used to analyse saliva (RT-PCR). Serum and  
21  
22  
23 288 spinal fluid are tested for rabies virus antibodies. Skin biopsies can be used to detect rabies  
24  
25 289 antigen in the cutaneous nerves at the base of the hair follicles  
26  
27  
28 290 (<https://www.cdc.gov/rabies/diagnosis/animals-humans.html>). In the future, there is a need  
29  
30 291 for developing country to standardize the diagnosis of rabies based on the laboratory test as  
31  
32  
33 292 mentioned above for accuracy of the diagnosis and to enable comparison with other studies  
34  
35 293 done in developed country.

36  
37 294 Of the included studies, only one study was conducted among butchers who were at  
38  
39  
40 295 higher risk of contracting rabies [20]. Apart from butchers, individuals working as  
41  
42  
43 296 veterinarians, veterinary technicians, animal control workers, and wildlife rehabilitators were  
44  
45 297 also considered to have higher risk of contracting rabies than the general population [39]. This  
46  
47 298 calls for more studies that incorporate individuals involved in occupations identified as high  
48  
49  
50 299 risk for rabies exposure and infection.

51  
52 300 In this study, climate factor was postulated to be one of the risk factors for rabies  
53  
54  
55 301 infection. This was echoed by a study in China, where the incidence of rabies increases  
56  
57 302 alongside the ambient temperature. A warmer climate causes animals to be more active in  
58  
59 303 their environment and to travel greater distances when tracking, which contributes to the  
60

1  
2  
3 304 spread of rabies. In addition, as temperatures rise, people tend to wear lighter clothing and  
4  
5  
6 305 expose more skin, which increases the likelihood of being bitten by a dog [40]. In South Korea,  
7  
8 306 it had been demonstrated that the seasonality of wildlife rabies were attributed to behaviours  
9  
10  
11 307 such as searching for food during the winter or early spring. Dogs may have had more  
12  
13 308 opportunities to come into contact with the rabid animals during this time due to greater  
14  
15 309 animal movement, which could have contributed to seasonal patterns in the occurrence of  
16  
17  
18 310 rabies in humans [41].

### 311 ***Mortality of Rabies in Southeast Asia Countries***

312 In this study, rabies had a high fatality rate, with 100 percent of infected cases dying. This is  
313 supported by a review done in Africa by Nyasulu et al, who reported that Algeria, Namibia,  
314 Eswatini (former Swaziland), Tunisia, Uganda, Zambia, and Zimbabwe had high morbidity and  
315 mortality with 563 cases (33.9 percent deaths), 269 cases (94 percent deaths), 62 cases (88.7  
316 percent deaths), 91 cases (90 percent deaths), 466 cases (40.9 percent), 207 cases (32.8  
317 percent deaths), and 114 cases [42]. Because of the high population of stray dogs in this area,  
318 the chances of being bitten by a dog are high. Not only are the chances of being bitten high  
319 in these areas, but access to treatment in a timely and adequate manner is also very limited.  
320 Rabies vaccines may not be routinely available in rural areas where most exposure occur, and  
321 rabies immunoglobulins, which are required for category III bites, are always in short supply  
322 [43].

323 This significantly contributes to the high mortality rate, as the highly protective rabies  
324 vaccine is frequently unavailable in these poor areas. In addition, the public often gets laid  
325 back and not aware to get early treatment after having been bitten by dogs [44]. According  
326 to recent studies, many rabies victims contracted the disease owing to neglect, ignorance, or  
327 a lack of primary health care facilities [45]. Thus, health promotion and education should be

1  
2  
3 328 given to the public as knowledge regarding rabies is essential to reduce morbidity and  
4  
5  
6 329 mortality [5].  
7

8 330 In high-income countries such as the United States, the incidence and mortality caused  
9  
10 331 by rabies is low. In the last decade, there have been only 25 cases of human rabies reported  
11  
12 332 in the United States (2009-2018), with 23 deaths reported [6]. The low cases of rabies  
13  
14 333 infection are due to successful animal control and vaccination programs, successful outreach  
15  
16 334 programs, public health capacity and laboratory diagnostics, and the availability of modern  
17  
18 335 rabies biologics [46]. Even though rabies is avoidable, the exorbitant expense of vaccinations,  
19  
20 336 combined with a lack of education and knowledge about the disease, limits PEP use.  
21  
22 337 According to recent studies, many rabies victims contracted the disease owing to neglect,  
23  
24 338 ignorance, or a lack of primary health care facilities [45].  
25  
26  
27  
28  
29

### 30 339 ***Strengths and Limitations***

31  
32 340 In this study, we only include research from Southeast Asia, which may not represent rabies  
33  
34 341 infection in other regions or continents. We did not include grey literature or national  
35  
36 342 guidelines, which could have been useful in this study. Our strengths, however, are that we  
37  
38 343 can tailor the control programme specifically for Southeast Asia countries, and we are aware  
39  
40 344 of the true burden of rabies infection in our region.  
41  
42  
43  
44

### 45 345 ***Recommendation***

46  
47 346 A successful rabies prevention and control program requires integrating and strengthening  
48  
49 347 intersectoral and transdisciplinary collaboration and cooperation among various society  
50  
51 348 components [47]. The ASEAN Rabies Elimination Strategy places great value on the  
52  
53 349 organizational and One Health frameworks for rabies eradication. The single most significant  
54  
55 350 way to deal with rabies concerns is to eliminate dog-mediated rabies. The requirement for  
56  
57 351 post-exposure human prophylaxis is considerably reduced when dog rabies is eradicated [48].  
58  
59  
60



1  
2  
3 352 To benefit from synergy and maximization of shared resources, comprehensive rabies control  
4  
5  
6 353 programs should involve the combination of human, financial, and material resources with  
7  
8 354 other interdisciplinary disease programs [25].  
9

10 355 Mass canine vaccination campaigns will boost herd immunity and reduce the risk of  
11  
12  
13 356 human rabies exposure, but this will need strong governmental commitment and extensive  
14  
15 357 social mobilization. The veterinary authority's active engagement in animal rabies control at  
16  
17  
18 358 the national level is critical, and it is their social responsibility to prevent human rabies  
19  
20 359 through well-planned dog rabies control programs [27]. In 1983, the Pan American Health  
21  
22  
23 360 Organization had initiated an elimination programme for human rabies transmitted by dogs  
24  
25 361 which were mainly based on mass immunization of dogs, and this has led to a 90% reduction  
26  
27 362 of dog rabies in Chile and other Latin American countries [49].  
28  
29

30 363 Rabies control and elimination in low endemic rabies countries such as Malaysia and  
31  
32  
33 364 Singapore have been made possible by strong enforcement of dog registration, vaccination,  
34  
35 365 and population management measures. Malaysia shares a border with Thailand, and the  
36  
37 366 notion of an immunological belt has been developed through dog licensing, required  
38  
39  
40 367 vaccination of dogs, and systematic extermination of unvaccinated dogs in a buffer zone to  
41  
42 368 prevent rabies from entering their country [27]. Perhaps other middle and high endemic  
43  
44  
45 369 rabies countries could follow the rabies control strategy that had been implemented by their  
46  
47 370 Southeast Asia neighbour.  
48

49 371 Public information and education are important to increase awareness and enhance  
50  
51  
52 372 community participation and support in rabies prevention programs. Dissemination of  
53  
54 373 important information such as the high fatality rate of rabies disease, its epidemiology, its  
55  
56  
57 374 prevention and control, the disease control program, in general, is vital for the program  
58  
59 375 implementation and responsible pet ownership. By recognizing rabies' influence on people's  
60

1  
2  
3 376 daily life and the fact that dogs can be a source of human infection, community and school-  
4  
5  
6 377 based rabies prevention initiatives will be easier to establish [50].  
7

8 378 The involvement of stakeholders is crucial and by bringing together key stakeholders  
9  
10 379 from the corporate and public sectors, we can address health security and the need of forming  
11  
12  
13 380 public-private partnerships which are critical in rabies prevention programs [51]. National  
14  
15 381 government agencies can maintain standardized ways for rabies management and  
16  
17  
18 382 elimination and advocate on how to begin public-private cooperation to ensure long-term  
19  
20 383 intervention. All stakeholders can benefit from such technical and administrative effort as  
21  
22  
23 384 they provide credibility and quality assurance for the prevention program's effectiveness [25].  
24  
25 385 Various examples of public-private partnerships that aid in implementing public programs,  
26  
27  
28 386 research, and policy formation can be seen in Bali, Indonesia, India, Sri Lanka, Philippines,  
29  
30 387 Thailand, and Vietnam [3].  
31

### 32 388 **Conclusion**

33  
34  
35 389 Rabies had often been neglected and not given priority in terms of funding for prevention  
36  
37  
38 390 programs that resulted in the continued presence of rabies cases in Southeast Asia despite  
39  
40 391 multiple programs being endorsed by WHO. The high number of unvaccinated stray and pet  
41  
42 392 dogs, working hazard (dog butcher in Vietnam), unavailability of rabies vaccine in rural areas,  
43  
44  
45 393 as well as ignorance regarding the importance of seeking treatment after dog bites are among  
46  
47 394 the factors that contribute to rabies cases in Southeast Asia.  
48

49 395

### 50 396 **Author Contributions**

51  
52  
53  
54 397 All authors, J.L.M.Y., A.F.N.A.H., D.A., N.R., M.R.H., S.S.S.A.R., M.S.J., A.O., and A.H. were  
55  
56  
57 398 involved in conceptualisation, methodology, extensive search of articles, critical review of  
58  
59  
60

1  
2  
3 399 articles, results synthesis and original draft write up. M.R.H. supervised the manuscript  
4  
5 400 preparation. All authors have read and agreed to the final draft of the manuscript.  
6  
7

8  
9 401 **Funding**

10  
11 402 This research received no external funding.  
12  
13

14  
15 403 **Competing interests**

16  
17 404 The authors declare no conflict of interest.  
18  
19

20  
21 405 **Patient consent for publication**

22  
23 406 Not applicable.  
24  
25

26  
27 407 **Ethics approval**

28  
29 408 Not applicable.  
30  
31

32  
33 409 **Data availability statement**

34  
35 410 Data are available upon reasonable request.  
36  
37

38  
39 411 **Acknowledgement**

40  
41 412 We would like to thank the Department of Community Health, Faculty of Medicine, National  
42  
43 413 University of Malaysia, for the technical support.  
44  
45

46  
47 414 **Figure:** PRISMA 2020 flow diagram for new systematic reviews which included searches of  
48  
49 415 databases and registers only  
50  
51

52  
53 416  
54  
55  
56  
57  
58  
59  
60

## References

1. Devleeschauwer B, Aryal A, Sharma BK, Ale A, Declercq A, Depraz S, Gaire TN, Gongal G, Karki S, Pandey BD, Pun SB, Duchateau L, Dorny P, Speybroeck N (2016) Epidemiology, Impact and Control of Rabies in Nepal: A Systematic Review. *PLoS Negl Trop Dis* 10:.. <https://doi.org/10.1371/journal.pntd.0004461>
2. World Health Organization (2021) WHO Fact Sheets: Rabies. <https://www.who.int/news-room/fact-sheets/detail/rabies>. Accessed 21 Mar 2022
3. World Health Organization (2013) WHO Expert Consultation on Rabies Second report. *World Health Organ Tech Rep Ser* 1–139
4. Hampson K, Coudeville L, Lembo T, Sambo M, Kieffer A, Attlan M, Barrat J, Blanton JD, Briggs DJ, Cleaveland S, Costa P, Freuling CM, Hiby E, Knopf L, Leanes F, Meslin FX, Metlin A, Miranda ME, Müller T, Nel LH, Recuenco S, Rupprecht CE, Schumacher C, Taylor L, Vigilato MAN, Zinsstag J, Dushoff J (2015) Estimating the Global Burden of Endemic Canine Rabies. *PLoS Negl Trop Dis* 9:.. <https://doi.org/10.1371/journal.pntd.0003709>
5. World Health Organization (2018) WHO expert consultation on rabies: third report (Vol. 1012)
6. Center for Disease Control and Prevention (2021) Rabies Status: Assessment by Country. <https://www.cdc.gov/rabies/resources/countries-risk.html>. Accessed 21 Mar 2022
7. Navanithakumar B, Sohayati A, Rohaiza Y, Sarah D, Mariani H, Leonora T, Dorothy K (2019) An Overview of Rabies Outbreaks in Malaysia, Ordinances and Laws. *Malays J Vet Res (Putrajaya)* 10:148–158
8. Tenzin, Ward MP (2012) Review of Rabies Epidemiology and Control in South, South East and East Asia: Past, Present and Prospects for Elimination. *Zoonoses Public Health* 59:451–467
9. Abela-Ridder B (2015) Rabies: 100 per cent fatal, 100 per cent preventable. *Vet Rec* 177:148–149
10. World Health Organization (2010) Rabies vaccines:WHO position paper. *Weekly epidemiological record = Relevé épidémiologique hebdomadaire* 85:309–320
11. John D, Royal A, Bharti O (2021) Burden of illness of dog-mediated rabies in India: A systematic review. *Clin Epidemiol Glob Health* 12:.. <https://doi.org/10.1016/j.cegh.2021.100804>
12. Alaifan T, Altamimi A (2019) A Systematic Review of epidemiology of Rabies in Arab countries. *J Health Inform Dev Ctries* 13:
13. Page MJ, McKenzie JE, Bossuyt PM, Boutron I, Hoffmann TC, Mulrow CD, Shamseer L, Tetzlaff JM, Akl EA, Brennan SE, Chou R, Glanville J, Grimshaw JM, Hróbjartsson A, Lalu MM, Li T, Loder EW, Mayo-Wilson E, McDonald S, McGuinness LA, Stewart LA, Thomas J, Tricco AC, Welch VA, Whiting P, Moher D (2021) The PRISMA 2020 statement: An updated guideline for reporting systematic reviews. *International Journal of Surgery* 88:.. <https://doi.org/10.1016/j.ijsu.2021.105906>

14. Munn Z, Stern C, Aromataris E, Lockwood C, Jordan Z (2018) What kind of systematic review should i conduct? A proposed typology and guidance for systematic reviewers in the medical and health sciences. *BMC Med Res Methodol* 18
15. Stern C, Al E, Sigurdson C, Middlet A, Kerr S, Lawrence M (2014) Developing the Review Question and Inclusion Criteria Tobacco and alcohol-relat ed int ervent ions for people wit h mild/moderat e int ellect ual disabilit ies: a sy.... *AJN The American Journal of Nursing* 114:53–56
16. Hong QN, Fàbregues S, Bartlett G, Boardman F, Cargo M, Dagenais P, Gagnon MP, Griffiths F, Nicolau B, O’Cathain A, Rousseau MC, Vedel I, Pluye P (2018) The Mixed Methods Appraisal Tool (MMAT) version 2018 for information professionals and researchers. *Education for Information* 34:285–291. <https://doi.org/10.3233/EFI-180221>
17. Guzman FD, Iwamoto Y, Saito N, Salva EP, Dimaano EM, Nishizono A, Suzuki M, Oloko O, Ariyoshi K, Smith C, Parry CM, Solante RM (2022) Clinical, epidemiological, and spatial features of human rabies cases in Metro Manila, the Philippines from 2006 to 2015. *PLoS Negl Trop Dis* 16:. <https://doi.org/10.1371/journal.pntd.0010595>
18. Phung D, Nguyen HX, Thi Nguyen HL, Luong AM, Do CM, Tran QD, Chu C (2018) The effects of socioecological factors on variation of communicable diseases: A multiple-disease study at the national scale of Vietnam. *PLoS One* 13:. <https://doi.org/10.1371/journal.pone.0193246>
19. Pham QD, Phan LT, Nguyen TPT, Doan QMN, Nguyen HD, Luong QC, Nguyen TV (2021) An Evaluation of the Rabies Surveillance in Southern Vietnam. *Front Public Health* 9:. <https://doi.org/10.3389/fpubh.2021.610905>
20. Nguyen AKT, Vu AH, Nguyen TT, Nguyen DV, Ngo GC, Pham TQ, Inoue S, Nishizono A (2021) Risk Factors and Protective Immunity Against Rabies in Unvaccinated Butchers Working at Dog Slaughterhouses in Northern Vietnam. *Am J Trop Med Hyg*
21. Lee HS, Thiem VD, Anh DD, Duong TN, Lee M, Grace D, Nguyen-Viet H (2018) Geographical and temporal patterns of rabies post exposure prophylaxis (PEP) incidence in humans in the mekong river delta and southeast central coast regions in Vietnam from 2005 to 2015. *PLoS One* 13
22. Susilawathi NM, Darwinata AE, Dwija IBNP, Budayanti NS, Wirasandhi GAK, Subrata K, Susilarini NK, Sudewi RAA, Wignall FS, Mahardika GNK (2012) Epidemiological and clinical features of human rabies cases in Bali 2008-2010. *BMC Infect Dis* 12:. <https://doi.org/10.1186/1471-2334-12-81>
23. Sim BNH, Liang BNW, Ning WS, Viswanathan S (2021) A retrospective analysis of emerging rabies: A neglected tropical disease in sarawak, malaysia clinical. *Journal of the Royal College of Physicians of Edinburgh* 51:133–139. <https://doi.org/10.4997/JRCPE.2021.207>
24. Yurachai O, Hinjoy S, Wallace RM (2020) An epidemiological study of suspected rabies exposures and adherence to rabies post-exposure prophylaxis in eastern thailand, 2015. *PLoS Negl Trop Dis* 14:. <https://doi.org/10.1371/journal.pntd.0007248>
25. Miranda MEG, Miranda NLJ (2020) Rabies prevention in Asia: Institutionalizing implementation capacities. In: *Rabies and Rabies Vaccines* . Springer, Cham, pp 103–116

- 1
  - 2
  - 3
  - 4
  - 5
  - 6
  - 7
  - 8
  - 9
  - 10
  - 11
  - 12
  - 13
  - 14
  - 15
  - 16
  - 17
  - 18
  - 19
  - 20
  - 21
  - 22
  - 23
  - 24
  - 25
  - 26
  - 27
  - 28
  - 29
  - 30
  - 31
  - 32
  - 33
  - 34
  - 35
  - 36
  - 37
  - 38
  - 39
  - 40
  - 41
  - 42
  - 43
  - 44
  - 45
  - 46
  - 47
  - 48
  - 49
  - 50
  - 51
  - 52
  - 53
  - 54
  - 55
  - 56
  - 57
  - 58
  - 59
  - 60
26. World Health Organization (2017) Human rabies: 2016 updates and call for data. *Wkly Epidemiol Rec* 92:77–86
27. Gongal G, Wright AE (2011) Human Rabies in the WHO Southeast Asia Region: Forward Steps for Elimination. *Adv Prev Med* 2011:1–5. <https://doi.org/10.4061/2011/383870>
28. Knobel DL, Cleaveland S, Coleman PG, Fèvre EM, Meltzer MI, Elizabeth M, Miranda G, Shaw A, Zinsstag J, Meslin & F-X (2005) Re-evaluating the burden of rabies in Africa and Asia. *Bull World Health Organ* 83:360–368
29. Chanachai K, Wongphruksasoong V, Vos A, Leelahapongsathon K, Tangwangvivat R, Sagarasaeranee O, Lekcharoen P, Trinuson P, Kasemsuwan S (2021) Feasibility and effectiveness studies with oral vaccination of free-roaming dogs against rabies in Thailand. *Viruses* 13:. <https://doi.org/10.3390/v13040571>
30. Schneider MC, Belotto A, Adé MP, Hendrickx S, Leanes LF, de Rodrigues MJF, Medina G, Correa E (2007) Current Status of Human Rabies Transmitted by Dogs in Latin America. *Cad Saúde Pública* 23:2049–2063
31. Nguyen TT, Hoang VT, Nguyen TH (2013) Epidemiology of rabies in Vietnam, 2009–2011. *J Prev Med (Wilmington)* 7:29–37
32. Qi L, Su K, Shen T, Tang W, Xiao B, Long J, Zhao H, Chen X, Xia Y, Xiong Y, Xiao D, Feng L, Li Q (2018) Epidemiological characteristics and post-exposure prophylaxis of human rabies in Chongqing, China, 2007-2016. *BMC Infect Dis* 18:. <https://doi.org/10.1186/s12879-017-2830-x>
33. San Jose R, Magsino PJ, Bundalian R (2019) Pet owners' awareness on RA 9482 (Anti-Rabies Act of 2007) in Magalang, Pampanga Philippines. *Heliyon* 5:. <https://doi.org/10.1016/j.heliyon.2019.e01759>
34. Republic Act No. 8485
35. Abdulmoghni RT, Al-Ward AH, Al-Moayed KA, AL-Amad MA, Khader YS (2021) Incidence, trend, and mortality of human exposure to rabies in yemen, 2011-2017: Observational study. *JMIR Public Health Surveill* 7
36. Guadu T, Shite A, Chanie M, Bogale B, Fentahun T (2014) Assessment of Knowledge, Attitude and Practices about Rabies and Associated Factors: In the Case of Bahir Dar Town. *Glob Vet* 13:348–354. <https://doi.org/10.5829/idosi.gv.2014.13.03.8579>
37. Yibrah M, Damtie D (2015) Incidence of human rabies exposure and associated factors at the Gondar Health Center, Ethiopia: A three-year retrospective study. *Infect Dis Poverty* 4:. <https://doi.org/10.1186/2049-9957-4-3>
38. Horton DL, Ismail MZ, Siryan ES, Wali ARA, Ab-dulla HE, Wise E, Voller K, Harkess G, Marston DA, McElhinney LM, Abbas SF, Fooks AR (2013) Rabies in Iraq: Trends in Human Cases 2001-2010 and Characterisation of Animal Rabies Strains from Baghdad. *PLoS Negl Trop Dis* 7:. <https://doi.org/10.1371/journal.pntd.0002075>
39. Blanton et al 2018

- 1
  - 2
  - 3
  - 4
  - 5
  - 6
  - 7
  - 8
  - 9
  - 10
  - 11
  - 12
  - 13
  - 14
  - 15
  - 16
  - 17
  - 18
  - 19
  - 20
  - 21
  - 22
  - 23
  - 24
  - 25
  - 26
  - 27
  - 28
  - 29
  - 30
  - 31
  - 32
  - 33
  - 34
  - 35
  - 36
  - 37
  - 38
  - 39
  - 40
  - 41
  - 42
  - 43
  - 44
  - 45
  - 46
  - 47
  - 48
  - 49
  - 50
  - 51
  - 52
  - 53
  - 54
  - 55
  - 56
  - 57
  - 58
  - 59
  - 60
40. Guo D, Yin W, Yu H, Thill JC, Yang W, Chen F, Wang D (2018) The role of socioeconomic and climatic factors in the spatio-temporal variation of human rabies in China. *BMC Infect Dis* 18:. <https://doi.org/10.1186/s12879-018-3427-8>
41. Kim et al 2006
42. Nyasulu PS, Weyer J, Tschopp R, Mihret A, Aseffa A, Nuvor SV, Tamuzi JL, Nyakarahuka L, Helegbe GK, Ntinginya NE, Gebreyesus MT, Doumbia S, Busse R, Drosten C (2021) Rabies mortality and morbidity associated with animal bites in Africa: A case for integrated rabies disease surveillance, prevention and control: A scoping review. *BMJ Open* 11
43. Acharya KP, Subedi D, Wilson RT (2021) Rabies control in South Asia requires a One Health approach. *One Health* 12:. <https://doi.org/10.1016/j.onehlt.2021.100215>
44. Liu Q, Wang X, Liu B, Gong Y, Mkandawire N, Li W, Fu W, Li L, Gan Y, Shi J, Shi B, Liu J, Cao S, Lu Z (2017) Improper wound treatment and delay of rabies post-exposure prophylaxis of animal bite victims in China: Prevalence and determinants. *PLoS Negl Trop Dis* 11:. <https://doi.org/10.1371/journal.pntd.0005663>
45. World Health Organization (2007) Rabies vaccines WHO Position Paper. *Weekly Epidemiological Record = Relevé épidémiologique hebdomadaire* 82:425–436
46. Center for Disease Control and Prevention (2021) Human Rabies. [https://www.cdc.gov/rabies/location/usa/surveillance/human\\_rabies.html](https://www.cdc.gov/rabies/location/usa/surveillance/human_rabies.html). Accessed 21 Mar 2022
47. Léchenne M, Miranda ME, Zinsstag J., Schelling E, Waltner-Toews D, Whittaker M (2015) Integrated rabies control. In: *One Health: the theory and practice of integrated health approaches*. CAB International, pp 176–189
48. OIE SRR-SEA (2016) OIE World Organisation for Animal Health, OIE Sub-Regional Representation for South-East Asia (OIE SRR-SEA): ASEAN rabies elimination strategy
49. Belotto A, Leanes LF, Schneider MC, Tamayo H, Correa E (2005) Overview of rabies in the Americas. *Virus Res* 111:5–12. <https://doi.org/10.1016/J.VIRUSRES.2005.03.006>
50. Birhane MG, Elizabeth Miranda MG, Dyer JL, Blanton JD, Recuenco S (2012) Willingness to Pay for Dog Rabies Vaccine and Registration in Ilocos Norte, Philippines. *PLoS Negl Trop Dis* 10:. <https://doi.org/10.1371/journal.pntd.0004486>
51. Lembo T, Attlan M, Bourhy H, Cleaveland S, Costa P, de Balogh K, Dodet B, Fooks AR, Hiby E, Leanes F, Meslin FX, Miranda ME, Müller T, Nel LH, Rupprecht CE, Tordo N, Tumpey A, Wandeler A, Briggs DJ (2011) Renewed global partnerships and redesigned roadmaps for rabies prevention and control. *Vet Med Int* 2011



PRISMA 2020 flow diagram for new systematic reviews which included searches of databases and registers only

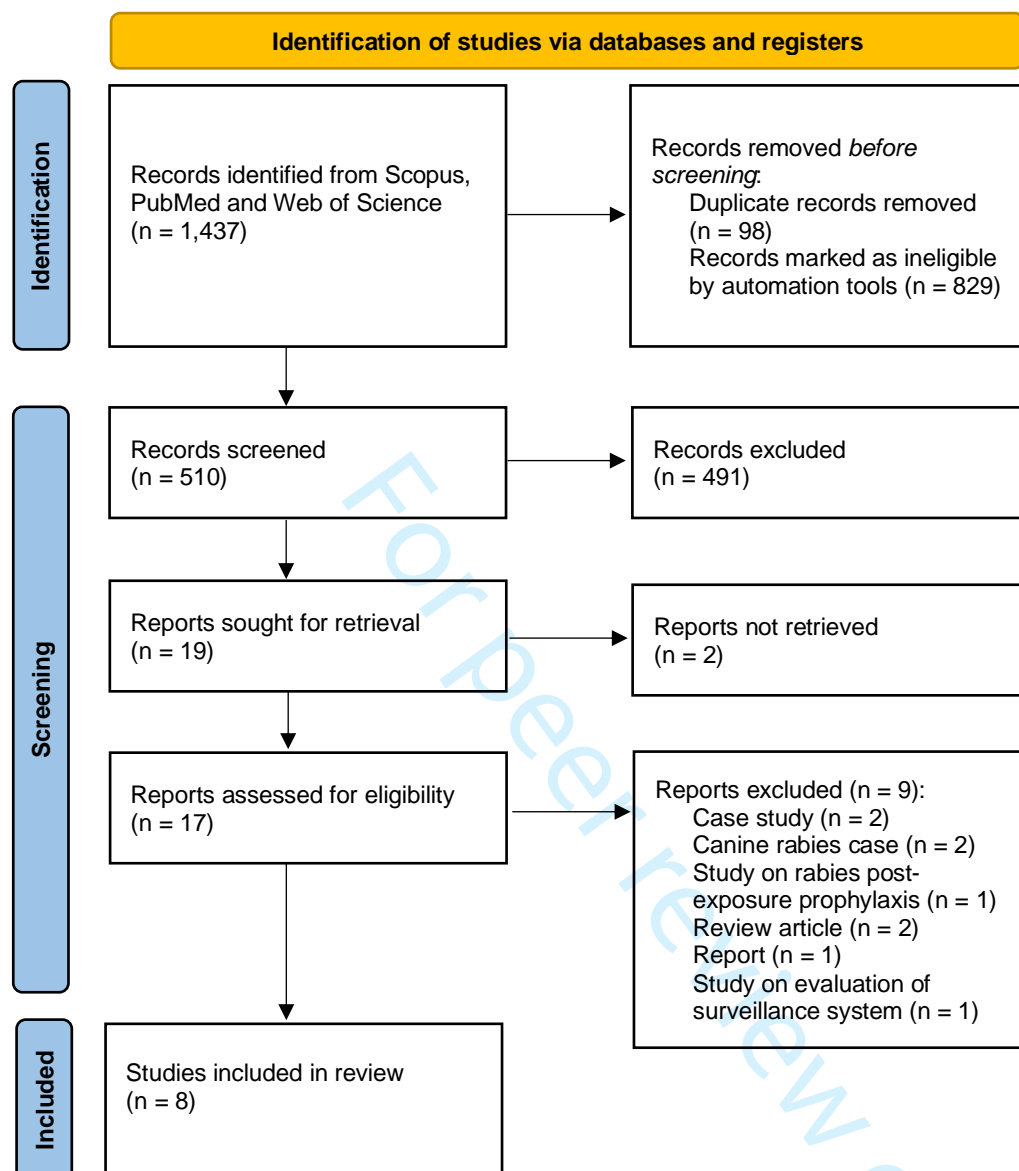



# Reporting checklist for the systematic review of Rabies in South East Asia.

Based on the PRISMA guidelines.

## Instructions to authors

Complete this checklist by entering the page numbers from your manuscript where readers will find each of the items listed below.

Your article may not currently address all the items on the checklist. Please modify your text to include the missing information. If you are certain that an item does not apply, please write "n/a" and provide a short explanation.

Upload your completed checklist as an extra file when you submit to a journal.

In your methods section, say that you used the PRISMA reporting guidelines, and cite them as:

Page MJ, McKenzie JE, Bossuyt PM, Boutron I, Hoffmann TC, Mulrow CD, Shamseer L, Tetzlaff JM, Akl EA, Brennan SE, Chou R, Glanville J, Grimshaw JM, Hróbjartsson A, Lalu MM, Li T, Loder EW, Mayo-Wilson E, McDonald S, McGuinness LA, Stewart LA, Thomas J, Tricco AC, Welch VA, Whiting P, Moher D. The PRISMA 2020 statement: An updated guideline for reporting systematic reviews

|              | Reporting Item                                                | Page Number |
|--------------|---------------------------------------------------------------|-------------|
| <b>Title</b> |                                                               |             |
| Title        | <a href="#">#1</a> Identify the report as a systematic review | 1           |

## Abstract

|    |                      |                    |                                                                |     |
|----|----------------------|--------------------|----------------------------------------------------------------|-----|
| 1  | Abstract             | <a href="#">#2</a> | Report an abstract addressing each item in the PRISMA          | 1-2 |
| 2  |                      |                    |                                                                |     |
| 3  |                      |                    | 2020 for Abstracts checklist                                   |     |
| 4  |                      |                    |                                                                |     |
| 5  |                      |                    |                                                                |     |
| 6  | <b>Introduction</b>  |                    |                                                                |     |
| 7  |                      |                    |                                                                |     |
| 8  |                      |                    |                                                                |     |
| 9  |                      |                    |                                                                |     |
| 10 | Background/rationale | <a href="#">#3</a> | Describe the rationale for the review in the context of        | 3   |
| 11 |                      |                    | existing knowledge                                             |     |
| 12 |                      |                    |                                                                |     |
| 13 |                      |                    |                                                                |     |
| 14 |                      |                    |                                                                |     |
| 15 | Objectives           | <a href="#">#4</a> | Provide an explicit statement of the objective(s) or           | 4   |
| 16 |                      |                    | question(s) the review addresses                               |     |
| 17 |                      |                    |                                                                |     |
| 18 |                      |                    |                                                                |     |
| 19 |                      |                    |                                                                |     |
| 20 | <b>Methods</b>       |                    |                                                                |     |
| 21 |                      |                    |                                                                |     |
| 22 |                      |                    |                                                                |     |
| 23 | Eligibility criteria | <a href="#">#5</a> | Specify the inclusion and exclusion criteria for the review    | 6   |
| 24 |                      |                    | and how studies were grouped for the syntheses                 |     |
| 25 |                      |                    |                                                                |     |
| 26 |                      |                    |                                                                |     |
| 27 |                      |                    |                                                                |     |
| 28 |                      |                    |                                                                |     |
| 29 | Information sources  | <a href="#">#6</a> | Specify all databases, registers, websites, organisations,     | 5-6 |
| 30 |                      |                    | reference lists, and other sources searched or consulted to    |     |
| 31 |                      |                    | identify studies. Specify the date when each source was        |     |
| 32 |                      |                    | last searched or consulted                                     |     |
| 33 |                      |                    |                                                                |     |
| 34 |                      |                    |                                                                |     |
| 35 |                      |                    |                                                                |     |
| 36 |                      |                    |                                                                |     |
| 37 |                      |                    |                                                                |     |
| 38 |                      |                    |                                                                |     |
| 39 | Search strategy      | <a href="#">#7</a> | Present the full search strategies for all databases,          | 5-6 |
| 40 |                      |                    | registers, and websites, including any filters and limits used |     |
| 41 |                      |                    |                                                                |     |
| 42 |                      |                    |                                                                |     |
| 43 |                      |                    |                                                                |     |
| 44 | Selection process    | <a href="#">#8</a> | Specify the methods used to decide whether a study met         | 5-6 |
| 45 |                      |                    | the inclusion criteria of the review, including how many       |     |
| 46 |                      |                    | reviewers screened each record and each report retrieved,      |     |
| 47 |                      |                    | whether they worked independently, and, if applicable,         |     |
| 48 |                      |                    | details of automation tools used in the process                |     |
| 49 |                      |                    |                                                                |     |
| 50 |                      |                    |                                                                |     |
| 51 |                      |                    |                                                                |     |
| 52 |                      |                    |                                                                |     |
| 53 |                      |                    |                                                                |     |
| 54 |                      |                    |                                                                |     |
| 55 |                      |                    |                                                                |     |
| 56 | Data collection      | <a href="#">#9</a> | Specify the methods used to collect data from reports,         | 5-6 |
| 57 |                      |                    |                                                                |     |
| 58 |                      |                    |                                                                |     |
| 59 |                      |                    |                                                                |     |
| 60 |                      |                    |                                                                |     |

|    |                    |                      |                                                               |     |
|----|--------------------|----------------------|---------------------------------------------------------------|-----|
| 1  | process            |                      | including how many reviewers collected data from each         |     |
| 2  |                    |                      | report, whether they worked independently, any processes      |     |
| 3  |                    |                      | for obtaining or confirming data from study investigators,    |     |
| 4  |                    |                      | and, if applicable, details of automation tools used in the   |     |
| 5  |                    |                      | process                                                       |     |
| 6  |                    |                      |                                                               |     |
| 7  |                    |                      |                                                               |     |
| 8  |                    |                      |                                                               |     |
| 9  |                    |                      |                                                               |     |
| 10 |                    |                      |                                                               |     |
| 11 |                    |                      |                                                               |     |
| 12 | Data items         | <a href="#">#10a</a> | List and define all outcomes for which data were sought.      | 5-6 |
| 13 |                    |                      | Specify whether all results that were compatible with each    |     |
| 14 |                    |                      | outcome domain in each study were sought (for example,        |     |
| 15 |                    |                      | for all measures, time points, analyses), and, if not, the    |     |
| 16 |                    |                      | methods used to decide which results to collect               |     |
| 17 |                    |                      |                                                               |     |
| 18 |                    |                      |                                                               |     |
| 19 |                    |                      |                                                               |     |
| 20 |                    |                      |                                                               |     |
| 21 |                    |                      |                                                               |     |
| 22 |                    |                      |                                                               |     |
| 23 |                    |                      |                                                               |     |
| 24 | Data items         | <a href="#">#10b</a> | List and define all other variables for which data were       | 5-6 |
| 25 |                    |                      | sought (such as participant and intervention characteristics, |     |
| 26 |                    |                      | funding sources). Describe any assumptions made about         |     |
| 27 |                    |                      | any missing or unclear information                            |     |
| 28 |                    |                      |                                                               |     |
| 29 |                    |                      |                                                               |     |
| 30 |                    |                      |                                                               |     |
| 31 |                    |                      |                                                               |     |
| 32 |                    |                      |                                                               |     |
| 33 |                    |                      |                                                               |     |
| 34 | Study risk of bias | <a href="#">#11</a>  | Specify the methods used to assess risk of bias in the        | 18  |
| 35 | assessment         |                      | included studies, including details of the tool(s) used, how  |     |
| 36 |                    |                      | many reviewers assessed each study and whether they           |     |
| 37 |                    |                      | worked independently, and, if applicable, details of          |     |
| 38 |                    |                      | automation tools used in the process                          |     |
| 39 |                    |                      |                                                               |     |
| 40 |                    |                      |                                                               |     |
| 41 |                    |                      |                                                               |     |
| 42 |                    |                      |                                                               |     |
| 43 |                    |                      |                                                               |     |
| 44 |                    |                      |                                                               |     |
| 45 |                    |                      |                                                               |     |
| 46 | Effect measures    | <a href="#">#12</a>  | Specify for each outcome the effect measure(s) (such as       | 8   |
| 47 |                    |                      | risk ratio, mean difference) used in the synthesis or         |     |
| 48 |                    |                      | presentation of results                                       |     |
| 49 |                    |                      |                                                               |     |
| 50 |                    |                      |                                                               |     |
| 51 |                    |                      |                                                               |     |
| 52 |                    |                      |                                                               |     |
| 53 |                    |                      |                                                               |     |
| 54 | Synthesis methods  | <a href="#">#13a</a> | Describe the processes used to decide which studies were      | 6   |
| 55 |                    |                      | eligible for each synthesis (such as tabulating the study     |     |
| 56 |                    |                      |                                                               |     |
| 57 |                    |                      |                                                               |     |
| 58 |                    |                      |                                                               |     |
| 59 |                    |                      |                                                               |     |
| 60 |                    |                      |                                                               |     |

|    |                      |                                                                                |                      |
|----|----------------------|--------------------------------------------------------------------------------|----------------------|
| 1  |                      | intervention characteristics and comparing against the                         |                      |
| 2  |                      | planned groups for each synthesis (item #5))                                   |                      |
| 3  |                      |                                                                                |                      |
| 4  |                      |                                                                                |                      |
| 5  |                      |                                                                                |                      |
| 6  | Synthesis methods    | <a href="#">#13b</a> Describe any methods required to prepare the data for     | 6                    |
| 7  |                      | presentation or synthesis, such as handling of missing                         |                      |
| 8  |                      | summary statistics or data conversions                                         |                      |
| 9  |                      |                                                                                |                      |
| 10 |                      |                                                                                |                      |
| 11 |                      |                                                                                |                      |
| 12 |                      |                                                                                |                      |
| 13 | Synthesis methods    | <a href="#">#13c</a> Describe any methods used to tabulate or visually display | 6                    |
| 14 |                      | results of individual studies and syntheses                                    |                      |
| 15 |                      |                                                                                |                      |
| 16 |                      |                                                                                |                      |
| 17 |                      |                                                                                |                      |
| 18 |                      |                                                                                |                      |
| 19 | Synthesis methods    | <a href="#">#13d</a> Describe any methods used to synthesise results and       | 6                    |
| 20 |                      | provide a rationale for the choice(s). If meta-analysis was                    |                      |
| 21 |                      | performed, describe the model(s), method(s) to identify the                    |                      |
| 22 |                      | presence and extent of statistical heterogeneity, and                          |                      |
| 23 |                      | software package(s) used                                                       |                      |
| 24 |                      |                                                                                |                      |
| 25 |                      |                                                                                |                      |
| 26 |                      |                                                                                |                      |
| 27 |                      |                                                                                |                      |
| 28 |                      |                                                                                |                      |
| 29 |                      |                                                                                |                      |
| 30 |                      |                                                                                |                      |
| 31 | Synthesis methods    | <a href="#">#13e</a> Describe any methods used to explore possible causes of   | 6                    |
| 32 |                      | heterogeneity among study results (such as subgroup                            |                      |
| 33 |                      | analysis, meta-regression)                                                     |                      |
| 34 |                      |                                                                                |                      |
| 35 |                      |                                                                                |                      |
| 36 |                      |                                                                                |                      |
| 37 |                      |                                                                                |                      |
| 38 |                      |                                                                                |                      |
| 39 | Synthesis methods    | <a href="#">#13f</a> Describe any sensitivity analyses conducted to assess     | 6                    |
| 40 |                      | robustness of the synthesised results                                          |                      |
| 41 |                      |                                                                                |                      |
| 42 |                      |                                                                                |                      |
| 43 |                      |                                                                                |                      |
| 44 | Reporting bias       | <a href="#">#14</a> Describe any methods used to assess risk of bias due to    | 18                   |
| 45 | assessment           | missing results in a synthesis (arising from reporting                         |                      |
| 46 |                      | biases)                                                                        |                      |
| 47 |                      |                                                                                |                      |
| 48 |                      |                                                                                |                      |
| 49 |                      |                                                                                |                      |
| 50 |                      |                                                                                |                      |
| 51 | Certainty assessment | <a href="#">#15</a> Describe any methods used to assess certainty (or          | <a href="#">N/A5</a> |
| 52 |                      | confidence) in the body of evidence for an outcome                             |                      |
| 53 |                      |                                                                                |                      |
| 54 |                      |                                                                                |                      |
| 55 |                      |                                                                                |                      |
| 56 |                      |                                                                                |                      |
| 57 | <b>Results</b>       |                                                                                |                      |
| 58 |                      |                                                                                |                      |
| 59 |                      |                                                                                |                      |
| 60 |                      |                                                                                |                      |

|    |                         |                      |                                                                                                             |       |
|----|-------------------------|----------------------|-------------------------------------------------------------------------------------------------------------|-------|
| 1  | Study selection         | <a href="#">#16a</a> | Describe the results of the search and selection process,                                                   | 7-10  |
| 2  |                         |                      | from the number of records identified in the search to the                                                  |       |
| 3  |                         |                      | number of studies included in the review, ideally using a                                                   |       |
| 4  |                         |                      | flow diagram ( <a href="http://www.prisma-statement.org/PRISMAStatement/FlowDiagram">http://www.prisma-</a> |       |
| 5  |                         |                      | statement.org/PRISMAStatement/FlowDiagram)                                                                  |       |
| 6  |                         |                      |                                                                                                             |       |
| 7  |                         |                      |                                                                                                             |       |
| 8  |                         |                      |                                                                                                             |       |
| 9  |                         |                      |                                                                                                             |       |
| 10 |                         |                      |                                                                                                             |       |
| 11 |                         |                      |                                                                                                             |       |
| 12 |                         |                      |                                                                                                             |       |
| 13 | Study selection         | <a href="#">#16b</a> | Cite studies that might appear to meet the inclusion criteria,                                              | 7-10  |
| 14 |                         |                      | but which were excluded, and explain why they were                                                          |       |
| 15 |                         |                      | excluded                                                                                                    |       |
| 16 |                         |                      |                                                                                                             |       |
| 17 |                         |                      |                                                                                                             |       |
| 18 |                         |                      |                                                                                                             |       |
| 19 |                         |                      |                                                                                                             |       |
| 20 |                         |                      |                                                                                                             |       |
| 21 | Study characteristics   | <a href="#">#17</a>  | Cite each included study and present its characteristics                                                    | 7-10  |
| 22 |                         |                      |                                                                                                             |       |
| 23 |                         |                      |                                                                                                             |       |
| 24 | Risk of bias in studies | <a href="#">#18</a>  | Present assessments of risk of bias for each included study                                                 | 18    |
| 25 |                         |                      |                                                                                                             |       |
| 26 |                         |                      |                                                                                                             |       |
| 27 | Results of individual   | <a href="#">#19</a>  | For all outcomes, present for each study (a) summary                                                        | 16-22 |
| 28 | studies                 |                      | statistics for each group (where appropriate) and (b) an                                                    |       |
| 29 |                         |                      | effect estimate and its precision (such as                                                                  |       |
| 30 |                         |                      | confidence/credible interval), ideally using structured tables                                              |       |
| 31 |                         |                      | or plots                                                                                                    |       |
| 32 |                         |                      |                                                                                                             |       |
| 33 |                         |                      |                                                                                                             |       |
| 34 |                         |                      |                                                                                                             |       |
| 35 |                         |                      |                                                                                                             |       |
| 36 |                         |                      |                                                                                                             |       |
| 37 |                         |                      |                                                                                                             |       |
| 38 |                         |                      |                                                                                                             |       |
| 39 | Results of syntheses    | <a href="#">#20a</a> | For each synthesis, briefly summarise the characteristics                                                   | 16-22 |
| 40 |                         |                      | and risk of bias among contributing studies                                                                 |       |
| 41 |                         |                      |                                                                                                             |       |
| 42 |                         |                      |                                                                                                             |       |
| 43 |                         |                      |                                                                                                             |       |
| 44 |                         |                      |                                                                                                             |       |
| 45 | Results of syntheses    | <a href="#">#20b</a> | Present results of all statistical syntheses conducted. If                                                  | 16-22 |
| 46 |                         |                      | meta-analysis was done, present for each the summary                                                        |       |
| 47 |                         |                      | estimate and its precision (such as confidence/credible                                                     |       |
| 48 |                         |                      | interval) and measures of statistical heterogeneity. If                                                     |       |
| 49 |                         |                      | comparing groups, describe the direction of the effect                                                      |       |
| 50 |                         |                      |                                                                                                             |       |
| 51 |                         |                      |                                                                                                             |       |
| 52 |                         |                      |                                                                                                             |       |
| 53 |                         |                      |                                                                                                             |       |
| 54 |                         |                      |                                                                                                             |       |
| 55 |                         |                      |                                                                                                             |       |
| 56 |                         |                      |                                                                                                             |       |
| 57 | Results of syntheses    | <a href="#">#20c</a> | Present results of all investigations of possible causes of                                                 | 16-22 |
| 58 |                         |                      |                                                                                                             |       |
| 59 |                         |                      |                                                                                                             |       |
| 60 |                         |                      |                                                                                                             |       |

heterogeneity among study results

1  
2  
3  
4 Results of syntheses [#20d](#) Present results of all sensitivity analyses conducted to 16-22  
5  
6 assess the robustness of the synthesised results  
7

8  
9 Risk of reporting [#21](#) Present assessments of risk of bias due to missing results 16-22  
10  
11 biases in syntheses (arising from reporting biases) for each synthesis assessed  
12

13  
14 Certainty of evidence [#22](#) Present assessments of certainty (or confidence) in the 16-22  
15  
16 body of evidence for each outcome assessed  
17  
18

## 19 Discussion

20  
21  
22  
23 Results in context [#23a](#) Provide a general interpretation of the results in the context 10-12  
24  
25 of other evidence  
26

27  
28 Limitations of included [#23b](#) Discuss any limitations of the evidence included in the 2  
29  
30 studies review  
31

32  
33 Limitations of the [#23c](#) Discuss any limitations of the review processes used 2  
34  
35 review methods  
36  
37

38  
39 Implications [#23d](#) Discuss implications of the results for practice, policy, and 13-15  
40  
41 future research  
42  
43

## 44 Other information

45  
46  
47 Registration and [#24a](#) Provide registration information for the review, including 15  
48  
49 protocol register name and registration number, or state that the  
50  
51 review was not registered  
52  
53

54  
55 Registration and [#24b](#) Indicate where the review protocol can be accessed, or 15  
56  
57 protocol state that a protocol was not prepared  
58  
59

|    |                       |                      |                                                            |       |
|----|-----------------------|----------------------|------------------------------------------------------------|-------|
| 1  | Registration and      | <a href="#">#24c</a> | Describe and explain any amendments to information         | N/A   |
| 2  |                       |                      |                                                            |       |
| 3  | protocol              |                      | provided at registration or in the protocol                |       |
| 4  |                       |                      |                                                            |       |
| 5  |                       |                      |                                                            |       |
| 6  | Support               | <a href="#">#25</a>  | Describe sources of financial or non-financial support for | 15    |
| 7  |                       |                      | the review, and the role of the funders or sponsors in the |       |
| 8  |                       |                      | review                                                     |       |
| 9  |                       |                      |                                                            |       |
| 10 |                       |                      |                                                            |       |
| 11 |                       |                      |                                                            |       |
| 12 |                       |                      |                                                            |       |
| 13 |                       |                      |                                                            |       |
| 14 | Competing interests   | <a href="#">#26</a>  | Declare any competing interests of review authors          | 15    |
| 15 |                       |                      |                                                            |       |
| 16 |                       |                      |                                                            |       |
| 17 | Availability of data, | <a href="#">#27</a>  | Report which of the following are publicly available and   | 16-22 |
| 18 | code, and other       |                      | where they can be found: template data collection forms;   |       |
| 19 |                       |                      | data extracted from included studies; data used for all    |       |
| 20 | materials             |                      | analyses; analytic code; any other materials used in the   |       |
| 21 |                       |                      | review                                                     |       |
| 22 |                       |                      |                                                            |       |
| 23 |                       |                      |                                                            |       |
| 24 |                       |                      |                                                            |       |
| 25 |                       |                      |                                                            |       |
| 26 |                       |                      |                                                            |       |
| 27 |                       |                      |                                                            |       |
| 28 |                       |                      |                                                            |       |

29 None The PRISMA checklist is distributed under the terms of the Creative Commons Attribution  
30 License CC-BY. This checklist can be completed online using <https://www.goodreports.org/>, a tool  
31 made by the [EQUATOR Network](#) in collaboration with [Penelope.ai](#)  
32  
33  
34  
35  
36  
37  
38  
39  
40  
41  
42  
43  
44  
45  
46  
47  
48  
49  
50  
51  
52  
53  
54  
55  
56  
57  
58  
59  
60

# BMJ Open

## Rabies in Southeast Asia: a systematic review of its incidence, risk factors, and mortality

|                                 |                                                                                                                                                                                                                                                                                                                                                                                                                                                                                                                                                                                                                                                                                                                                                                                                                                                                                                   |
|---------------------------------|---------------------------------------------------------------------------------------------------------------------------------------------------------------------------------------------------------------------------------------------------------------------------------------------------------------------------------------------------------------------------------------------------------------------------------------------------------------------------------------------------------------------------------------------------------------------------------------------------------------------------------------------------------------------------------------------------------------------------------------------------------------------------------------------------------------------------------------------------------------------------------------------------|
| Journal:                        | <i>BMJ Open</i>                                                                                                                                                                                                                                                                                                                                                                                                                                                                                                                                                                                                                                                                                                                                                                                                                                                                                   |
| Manuscript ID                   | bmjopen-2022-066587.R2                                                                                                                                                                                                                                                                                                                                                                                                                                                                                                                                                                                                                                                                                                                                                                                                                                                                            |
| Article Type:                   | Original research                                                                                                                                                                                                                                                                                                                                                                                                                                                                                                                                                                                                                                                                                                                                                                                                                                                                                 |
| Date Submitted by the Author:   | 20-Apr-2023                                                                                                                                                                                                                                                                                                                                                                                                                                                                                                                                                                                                                                                                                                                                                                                                                                                                                       |
| Complete List of Authors:       | Ling, Miaw Yn; Universiti Kebangsaan Malaysia, Department of Community Health<br>Halim, Ahmad Farid Nazmi Abdul; Universiti Kebangsaan Malaysia, Department of Community Health<br>Ahmad, Dzulfitee; Universiti Kebangsaan Malaysia, Department of Community Health<br>Ramly, Nurfatehar; Universiti Kebangsaan Malaysia, Department of Community Health<br>Hassan, Mohd Rohaizat; Universiti Kebangsaan Malaysia, Department of Community Health; Universiti Malaysia Sabah, Borneo Medical and Health Research Centre<br>Syed Abdul Rahim, Syed Sharizman; Universiti Malaysia Sabah, Department of Public Health Medicine<br>Saffree Jeffree, Mohammad ; Universiti Malaysia Sabah, Department of Public Health Medicine<br>Omar, Azizan; Universiti Malaysia Sabah, Department of Public Health Medicine<br>Hidrus, Aizuddin; Universiti Malaysia Sabah, Department of Public Health Medicine |
| <b>Primary Subject Heading</b>: | Public health                                                                                                                                                                                                                                                                                                                                                                                                                                                                                                                                                                                                                                                                                                                                                                                                                                                                                     |
| Secondary Subject Heading:      | Infectious diseases, Epidemiology                                                                                                                                                                                                                                                                                                                                                                                                                                                                                                                                                                                                                                                                                                                                                                                                                                                                 |
| Keywords:                       | Epidemiology < TROPICAL MEDICINE, EPIDEMIOLOGY, Public health < INFECTIOUS DISEASES, Systematic Review                                                                                                                                                                                                                                                                                                                                                                                                                                                                                                                                                                                                                                                                                                                                                                                            |
|                                 |                                                                                                                                                                                                                                                                                                                                                                                                                                                                                                                                                                                                                                                                                                                                                                                                                                                                                                   |

SCHOLARONE™  
Manuscripts





I, the Submitting Author has the right to grant and does grant on behalf of all authors of the Work (as defined in the below author licence), an exclusive licence and/or a non-exclusive licence for contributions from authors who are: i) UK Crown employees; ii) where BMJ has agreed a CC-BY licence shall apply, and/or iii) in accordance with the terms applicable for US Federal Government officers or employees acting as part of their official duties; on a worldwide, perpetual, irrevocable, royalty-free basis to BMJ Publishing Group Ltd ("BMJ") its licensees and where the relevant Journal is co-owned by BMJ to the co-owners of the Journal, to publish the Work in this journal and any other BMJ products and to exploit all rights, as set out in our [licence](#).

The Submitting Author accepts and understands that any supply made under these terms is made by BMJ to the Submitting Author unless you are acting as an employee on behalf of your employer or a postgraduate student of an affiliated institution which is paying any applicable article publishing charge ("APC") for Open Access articles. Where the Submitting Author wishes to make the Work available on an Open Access basis (and intends to pay the relevant APC), the terms of reuse of such Open Access shall be governed by a Creative Commons licence – details of these licences and which [Creative Commons](#) licence will apply to this Work are set out in our licence referred to above.

Other than as permitted in any relevant BMJ Author's Self Archiving Policies, I confirm this Work has not been accepted for publication elsewhere, is not being considered for publication elsewhere and does not duplicate material already published. I confirm all authors consent to publication of this Work and authorise the granting of this licence.

1  
2  
3  
4  
5  
6  
7  
8  
9  
10  
11  
12  
13  
14  
15  
16  
17  
18  
19  
20  
21  
22  
23  
24  
25  
26  
27  
28  
29  
30  
31  
32  
33  
34  
35  
36  
37  
38  
39  
40  
41  
42  
43  
44  
45  
46  
47  
48  
49  
50  
51  
52  
53  
54  
55  
56  
57  
58  
59  
60

# 1 Rabies in Southeast Asia: a systematic review of its incidence, risk factors and 2 mortality

3 Jane Ling Miaw Yn<sup>1</sup>, Ahmad Farid Nazmi Abdul Halim<sup>1</sup>, Dzulfitee Ahmad<sup>1</sup>, Nurfatehar Ramly<sup>1</sup>,  
4 \*Mohd Rohaizat Hassan<sup>1,3</sup>, Syed Sharizman Syed Abdul Rahim<sup>2</sup>, Mohammad Saffree Jeffree<sup>2</sup>,  
5 Azizan Omar<sup>2</sup>, \*Aizuddin Hidrus<sup>2</sup>

6  
7 <sup>1</sup>*Department of Community Health, Faculty of Medicine, Universiti Kebangsaan Malaysia,*  
8 *Bandar Tun Razak, Kuala Lumpur, Malaysia*

9 <sup>2</sup>*Department of Public Health Medicine, Faculty of Medicine and Health Sciences, Universiti*  
10 *Malaysia Sabah, Kota Kinabalu, Sabah, Malaysia*

11 <sup>3</sup>*Borneo Medical & Health Research Centre, Faculty of Medicine and Health Sciences,*  
12 *Universiti Malaysia Sabah, Kota Kinabalu, Sabah, Malaysia*

13  
14 \*Correspondence:

15 1. Aizuddin Hidrus, Department of Public Health Medicine, Faculty of Medicine and Health  
16 Sciences, Universiti Malaysia Sabah; Tel: +6088 320000; Email: aizuddin88@ums.edu.my

17 2. Mohd Rohaizat Hassan, Department of Community Health, Faculty of Medicine, Universiti  
18 Kebangsaan Malaysia; Tel: +603 91458785; Email: rohaizat@ppukm.ukm.edu.my

## 20 ABSTRACT

21 **Objective** Rabies is a neglected zoonotic disease that can infect all mammals, including  
22 humans. We aimed to summarise the current knowledge of the incidence, risk factors and  
23 mortality of rabies in Southeast Asia.

1  
2  
3 24 **Design** Systematic review based on the Preferred Reporting Items for Systematic Reviews and  
4  
5  
6 25 Meta-Analyses (PRISMA) 2020.

7  
8 26 **Data sources** Scopus, Web of Science and PubMed were searched from 1 January 2012 to 21  
9  
10  
11 27 February 2023.

12  
13 28 **Eligibility criteria** Original English language articles published between 2012 and 2023 were  
14  
15  
16 29 included.

17  
18 30 **Data extraction and synthesis** Nine independent reviewers extracted data and assessed the  
19  
20  
21 31 risk of bias. The quality appraisal of included articles was carried out using the Mixed Methods  
22  
23 32 Appraisal Tool (MMAT).

24  
25 33 **Results** A total of eight articles were included in this analysis. In Vietnam, the incidence of  
26  
27  
28 34 rabies ranged from 1.7 to 117.2 per 100,000 population. The cumulative incidence in Sarawak  
29  
30  
31 35 was estimated at 1.7 per 100,000 population. In Indonesia, 104 human rabies cases were  
32  
33 36 reported from 2008 to 2010, while in Thailand, a total of 46 rabies cases were reported in  
34  
35 37 Thailand from 2010 to 2015. In the Philippines, the incidence of rabies ranged from 0.1 to 0.3  
36  
37  
38 38 per 100,000 population. An increased risk of rabies virus infection was associated with a high  
39  
40  
41 39 population density, illiteracy, seasonal patterns and dog butchers. The case-fatality rate was  
42  
43 40 100%.

44  
45 41 **Conclusion** This study included research from Southeast Asia, which may not represent rabies  
46  
47  
48 42 infection in other regions or continents. Additionally, the role of publication bias should be  
49  
50  
51 43 acknowledged as grey literature was not included. The occurrence of rabies in Southeast Asia  
52  
53 44 is due to the high number of unvaccinated stray and pet dogs, working hazards (dog butchers  
54  
55 45 in Vietnam), the unavailability of the rabies vaccine in rural regions, and misinformation about  
56  
57 46 the significance of seeking treatment after dog bites.

58  
59 47 **PROSPERO registration number** CRD42022311654.  
60

1  
2  
3 48 **Keywords** Rabies, dog bite, zoonotic disease, epidemiology, Southeast Asia  
4

5  
6 49 **Strengths and limitations**  
7

- 8 50 • This review only includes research from Southeast Asia, which may not represent  
9  
10 51 rabies infection in other regions or continents.  
11  
12  
13 52 • We did not include grey literature or national guidelines, which could have been useful  
14  
15 53 in this study.  
16  
17  
18 54 • The inclusion of studies that defined or diagnosed rabies based on clinical signs or  
19  
20 55 laboratory tests increased the chances of identifying rabies cases in Southeast Asian  
21  
22  
23 56 countries.  
24  
25  
26  
27  
28  
29  
30  
31  
32  
33  
34  
35  
36  
37  
38  
39  
40  
41  
42  
43  
44  
45  
46  
47  
48  
49  
50  
51  
52  
53  
54  
55  
56  
57  
58  
59  
60

## 57 INTRODUCTION

58 Rabies is a neglected zoonotic disease caused by an RNA virus from the family *Rhabdoviridae*,  
59 genus *Lyssavirus* (1). Once clinical symptoms appear, rabies is almost 100% fatal (2). All  
60 mammals can be infected with the rabies virus, including humans. More than 99% of human  
61 rabies cases are transmitted via dogs (3). With the necessary evidence and tools in place for  
62 the control and elimination of rabies, canine rabies can be eliminated, as demonstrated in  
63 Western Europe, Canada, the United States of America (USA), Japan, a few Latin American  
64 countries and many parts of Asia. However, rabies is still widespread, occurring in more than  
65 80 countries, particularly developing countries in Africa and Asia (3,4). Furthermore, half of  
66 the global population lives in canine rabies-endemic areas and hence is at risk of contracting  
67 rabies (3).

68 Globally, canine rabies is estimated to cause approximately 59,000 human deaths  
69 annually. In Asia, rabies is clearly a major problem: the number of human deaths due to rabies  
70 in Asia is higher than in any other region in the world. Most human rabies deaths occur in Asia  
71 (59.6%), followed by Africa (36.4%), while only less than 0.05% of human rabies deaths occur  
72 in the Americas. Additionally, India alone accounts for 35% of global human rabies deaths,  
73 higher than any other country (4). In Asia, canine rabies is estimated to cause a loss of 2.2  
74 million Disability-Adjusted Life Years (DALYs) per year, while the annual cost of post-exposure  
75 prophylaxis (PEP) is highest in Asia, estimated at up to US\$ 1.5 billion (5).

76 In Southeast Asia, only Singapore has eradicated canine rabies through the  
77 implementation of robust national rabies control programs, while other countries in this  
78 subregion are not considered rabies-free (6). Malaysia was declared rabies-free by the World  
79 Organization for Animal Health in July 2013, but several rabies outbreaks since 2015 have  
80 caused Malaysia to lose its rabies-free status (7). Even though Thailand and Vietnam have not

1  
2  
3 81 been able to eliminate rabies, there has been a substantial reduction in human rabies deaths  
4  
5  
6 82 through the implementation of dog mass vaccination, intensified PEP in humans and  
7  
8 83 awareness education (8).

9  
10 84 Rabies is 100% preventable through vaccination in animals and humans (9). The World  
11  
12  
13 85 Health Organization (WHO) has recommended pre-exposure prophylaxis (PrEP) for those with  
14  
15 86 continual, frequent or increased risk of exposure to rabies virus (e.g. veterinarians and animal  
16  
17  
18 87 handlers). If exposed to a rabid animal, the WHO recommends PEP, which consists of  
19  
20 88 immediate wound management, immediate vaccination and the administration of rabies  
21  
22  
23 89 immunoglobulin for high-risk exposures (10). Nevertheless, dog vaccination is considered the  
24  
25 90 most cost-effective strategy for preventing rabies in humans (2).

26  
27  
28 91 Despite the availability of evidence and guidelines for the control and management of  
29  
30 92 rabies, countries in Southeast Asia face some constraints in controlling rabies, including  
31  
32 93 inadequate resources, lack of political commitment, lack of consensus on strategy, weak  
33  
34  
35 94 intersectoral coordination, insensitive surveillance systems, limited accessibility to modern  
36  
37 95 rabies vaccines and supply problems, as well as a lack of public awareness and cooperation  
38  
39  
40 96 (8). However, the high estimated burden of rabies more than justifies the need to prioritise  
41  
42 97 rabies control, particularly in Asian countries.

43  
44  
45 98 Information on rabies epidemiology is a prerequisite for the effective planning of  
46  
47 99 rabies control programs. Previous systematic reviews focused on rabies epidemiology in India  
48  
49  
50 100 (11), Nepal (1), and Arab countries (12), while literature synthesising data on rabies  
51  
52 101 epidemiology in Southeast Asia is limited. Hence, this systematic review aims to provide an  
53  
54 102 in-depth assessment of the incidence, risk factors, and mortality of rabies in Southeast Asian  
55  
56  
57 103 countries, based on the published literature.

58  
59 104  
60

## 105 **MATERIALS AND METHODS**

106 This systematic review was registered with the PROSPERO database (CRD42022311654) and  
107 reported in accordance with the Preferred Reporting Items for Systematic Reviews and Meta-  
108 Analyses (PRISMA) 2020 statement (13). A meta-analysis was not carried out as the included  
109 studies differed in terms of methodology, settings, participants, interventions, and outcomes,  
110 suggesting heterogeneity. An internal protocol was developed to document the criteria for  
111 conducting this systematic review, but this is not published.

### 113 **Patient and public involvement**

114 There was no patient and/or public involvement in this study (None).

### 116 **Research question formulation**

117 The review question was developed based on the CoCoPop (condition, context, population)  
118 and PEO (population, exposure, outcome) concepts (14). The PICO (population, intervention,  
119 comparison intervention, outcome measures) framework is commonly used to develop  
120 focused clinical questions for quantitative reviews (15), while the CoCoPop and PEO concepts  
121 are suitable for reviews related to prevalence and aetiology (14). Based on the CoCoPop  
122 concept, the condition refers to the incidence of rabies, the context refers to Southeast Asia  
123 and the population is the general population. Based on the PEO concept, the population refers  
124 to the general population in Southeast Asia, the exposure refers to rabies and the outcome is  
125 the mortality caused by rabies. Hence, the main research questions are (1) What is the  
126 incidence of rabies among the general population in Southeast Asian countries? (2) What are  
127 the risk factors of rabies among the general population in Southeast Asian countries? and (3)

1  
2  
3 128 What is the mortality rate of rabies among the general population in Southeast Asian  
4  
5  
6 129 countries?  
7

8 130 **Data source and search strategy**  
9

10 131 PubMed, Web of Science and Scopus were searched from 1 January 2012 to 21 February 2023.  
11  
12

13 132 The keywords used to search for related articles are provided in Table 1.  
14  
15

16 133  
17

18 134 Table 1: Keywords search used in the screening process.  
19

| Database       | Search string                                                                                                                                                                                                                                                                                                                                                                                                                                                                                                                                                                                                                                                                                                                                                                                                                                                                                                                                           |
|----------------|---------------------------------------------------------------------------------------------------------------------------------------------------------------------------------------------------------------------------------------------------------------------------------------------------------------------------------------------------------------------------------------------------------------------------------------------------------------------------------------------------------------------------------------------------------------------------------------------------------------------------------------------------------------------------------------------------------------------------------------------------------------------------------------------------------------------------------------------------------------------------------------------------------------------------------------------------------|
| Scopus         | <p>1) TITLE-ABS-KEY(("rabies*" OR "rabies virus*" OR "dog bite*") AND ("Southeast Asia" OR "Brunei" OR "Myanmar" OR "Cambodia" OR "Timor-Leste" OR "Indonesia" OR "Laos" OR "Malaysia" OR "Philippines" OR "Singapore" OR "Thailand" OR "Vietnam")) AND ("epidemiology" OR "outbreak" OR "case" OR "prevalence" OR "incidence" OR "causes" OR "risk factor"))</p> <p>2) TITLE-ABS-KEY(("Rabies*" OR "Rabies virus*" OR "dog bite*") AND ("Southeast Asia" OR "Brunei" OR "Myanmar" OR "Cambodia" OR "Timor-Leste" OR "Indonesia" OR "Laos" OR "Malaysia" OR "Philippines" OR "Singapore" OR "Thailand" OR "Vietnam")) AND ("mortality*" OR "death*" OR "fatality*"))</p>                                                                                                                                                                                                                                                                                |
| Web of Science | <p>1) (((ALL=("rabies*")) OR ALL=("rabies virus*")) OR ALL=("dog bite*")) AND (((((((((((ALL=("Southeast Asia")) OR ALL=("Brunei")) OR ALL=("Myanmar")) OR ALL=("Cambodia")) OR ALL=("Timor-Leste")) OR ALL=("Indonesia")) OR ALL=("Laos")) OR ALL=("Malaysia")) OR ALL=("Philippines")) OR ALL=("Singapore")) OR ALL=("Thailand")) OR ALL=("Vietnam")) AND (((((ALL=("epidemiology")) OR ALL=("outbreak")) OR ALL=("case")) OR ALL=("prevalence")) OR ALL=("incidence")) OR ALL=("causes")) OR ALL=("risk factor"))</p> <p>2) (((ALL=("rabies*")) OR ALL=("rabies virus*")) OR ALL=("dog bite*")) AND (((((((((((ALL=("Southeast Asia")) OR ALL=("Brunei")) OR ALL=("Myanmar")) OR ALL=("Cambodia")) OR ALL=("Timor-Leste")) OR ALL=("Indonesia")) OR ALL=("Laos")) OR ALL=("Malaysia")) OR ALL=("Philippines")) OR ALL=("Singapore")) OR ALL=("Thailand")) OR ALL=("Vietnam")) AND ((ALL=("mortality*")) OR ALL=("death*")) OR ALL=("fatality*"))</p> |



|        |                                                                                                                                                                                                                                                                                                                                                                                                                                                                                                                                                                                                                                                                                                                                                                                      |
|--------|--------------------------------------------------------------------------------------------------------------------------------------------------------------------------------------------------------------------------------------------------------------------------------------------------------------------------------------------------------------------------------------------------------------------------------------------------------------------------------------------------------------------------------------------------------------------------------------------------------------------------------------------------------------------------------------------------------------------------------------------------------------------------------------|
|        |                                                                                                                                                                                                                                                                                                                                                                                                                                                                                                                                                                                                                                                                                                                                                                                      |
| PubMed | <p>1) (((("rabies*") OR ("rabies virus*")) OR ("dog bite*")) AND (((((((((((("Southeast Asia") OR ("Brunei")) OR ("Myanmar")) OR ("Cambodia")) OR ("Timor-Leste")) OR ("Indonesia")) OR ("Laos")) OR ("Malaysia")) OR ("Philippines")) OR ("Singapore")) OR ("Thailand")) OR ("Vietnam")))) AND (((("epidemiology") OR ("outbreak")) OR ("case")) OR ("prevalence")) OR ("incidence")) OR ("causes")) OR ("risk factor"))</p> <p>2) (((("rabies*") OR ("rabies virus*")) OR ("dog bite*")) AND (((((((((((("Southeast Asia") OR ("Brunei")) OR ("Myanmar")) OR ("Cambodia")) OR ("Timor-Leste")) OR ("Indonesia")) OR ("Laos")) OR ("Malaysia")) OR ("Philippines")) OR ("Singapore")) OR ("Thailand")) OR ("Vietnam")))) AND (((("mortality*") OR ("death*")) OR ("fatality*"))</p> |

135

### 136 Study selection

137 The inclusion criteria were (1) publications from 2012 to 2023, (2) original articles and (3)  
 138 publications in the English language. The following types of studies were included in this  
 139 review: (1) reports on the incidence and risk factors of rabies in Southeast Asia and (2) reports  
 140 on the mortality rate of rabies in Southeast Asia. Non-original articles such as conference  
 141 proceedings, perspectives, commentaries, opinions, reports, systematic reviews and meta-  
 142 analyses were excluded. The publication period was limited to 2012–2023 so that the  
 143 systematic review could be built on recent literature.

144

### 145 Data extraction and synthesis

146 Duplicates were deleted, and at least two reviewers re-screened the remaining papers. Before  
 147 their inclusion in the review, articles were screened in three stages. Any article that did not  
 148 meet the inclusion criteria based on title screening was eliminated in the first phase. The  
 149 abstracts of the remaining papers were reviewed in the second phase, and any publications  
 150 that did not fit the inclusion criteria were eliminated from the review. The full-text articles  
 151 were examined attentively in the last phase to eliminate any papers that did not fulfil the

1  
2  
3 152 inclusion criteria. Before the data extraction process, both reviewers needed to agree that  
4  
5  
6 153 the entire publication should be reviewed. Any disagreements were worked out through  
7  
8 154 discussion. All data extraction was conducted independently using a standardised data  
9  
10  
11 155 extraction form that was organised using Microsoft Excel. Information collected in the form  
12  
13 156 included (1) author, (2) publication year, (3) reference, (4) country, (5) study design, (6)  
14  
15 157 statistical analysis and (7) results, which included incidence, risk factors and mortality. Due to  
16  
17  
18 158 the heterogeneity of the included studies, narrative synthesis was performed.  
19  
20  
21 159

### 22 23 160 **Quality assessment**

24  
25 161 Quality assessment was conducted by the authors on all eight studies using the Mixed  
26  
27 162 Methods Appraisal Tool (MMAT) (16). The MMAT is a critical appraisal tool that was  
28  
29  
30 163 developed to appraise studies included in systematic mixed study reviews. The quality of the  
31  
32 164 methodology of five categories of studies (qualitative studies, randomized controlled trials,  
33  
34  
35 165 non-randomised studies, quantitative descriptive studies, and mixed methods studies) can be  
36  
37 166 appraised using this tool. For each category, five criteria are used to assess the quality of the  
38  
39  
40 167 study. It is advised not to calculate an overall score from the rating of each criterion using the  
41  
42 168 latest version of MMAT (2018). However, due to problems faced by researchers in reporting  
43  
44  
45 169 the MMAT results, a suggestion was provided for reporting an overall score (5\*\*\*\*\*/100% of  
46  
47 170 the quality criteria met, 4\*\*\*\*\*/80% of the quality criteria met; 3\*\*\*\*\*/60% of the quality  
48  
49  
50 171 criteria met; 2\*\*\*\*\*/40% of the quality criteria met; 1\*\*\*\*\*/20% of the quality criteria met). The  
51  
52 172 details of this assessment are reported in Table 2.  
53  
54  
55  
56  
57  
58  
59  
60

173

174 Table 2: The details of mixed method appraisal tool assessment

| Author                 | Type of study | Score | 1.1                                                                 | 1.2                                                    | 1.3                               | 1.4                                  | 1.5                                                                      |
|------------------------|---------------|-------|---------------------------------------------------------------------|--------------------------------------------------------|-----------------------------------|--------------------------------------|--------------------------------------------------------------------------|
|                        |               |       | Is the sampling strategy relevant to address the research question? | Is the sample representative of the target population? | Are the measurements appropriate? | Is the risk of nonresponse bias low? | Is the statistical analysis appropriate to answer the research question? |
| Nguyen et al. 2021     | Quantitative  | 40%   | Can't tell                                                          | Can't tell                                             | Yes                               | Can't tell                           | Yes                                                                      |
| Pham et al. 2021       | Quantitative  | 100%  | Yes                                                                 | Yes                                                    | Yes                               | Yes                                  | Yes                                                                      |
| Sim et al. 2021        | Quantitative  | 60%   | Yes                                                                 | Can't tell                                             | Yes                               | Can't tell                           | Yes                                                                      |
| Yurachai et al. 2021   | Quantitative  | 80%   | Yes                                                                 | Yes                                                    | Yes                               | Can't tell                           | Yes                                                                      |
| Phung et al. 2018      | Quantitative  | 80%   | Yes                                                                 | Yes                                                    | Yes                               | Can't tell                           | Yes                                                                      |
| Susilawati et al. 2012 | Quantitative  | 80%   | Yes                                                                 | Yes                                                    | Yes                               | Yes                                  | No                                                                       |
| Lee et al. 2017        | Quantitative  | 100%  | Yes                                                                 | Yes                                                    | Yes                               | Yes                                  | Yes                                                                      |
| Guzman et al.2021      | Quantitative  | 80%   | Yes                                                                 | Yes                                                    | Yes                               | No                                   | Yes                                                                      |

## RESULTS

A total of 1,437 records were identified from the three databases to evaluate the incidence, risk factors and mortality rate of rabies in Southeast Asia. Using automation tools, 829 records were excluded based on year, publication type and language. A total of 98 duplicate records were found and removed, leaving 510 records for title screening. The titles and abstracts were screened independently based on the review questions. A total of 491 articles were removed during the screening. For the remaining 19 articles, the full text was retrieved for assessment of eligibility. Disagreements were resolved through discussion to reach a consensus. Eleven articles were removed for the following reasons: they did not meet the objective ( $n = 4$ ) (17–20), they were not primary/original research articles ( $n = 4$ ) (21–24), the full article could not be retrieved ( $n = 2$ ) (25,26) and they were duplicates ( $n = 1$ ) (27), leaving a total of eight articles for proceeding with the quality appraisal. The PRISMA flowchart is presented in Figure 1.

### Quality appraisal

According to the MMAT evaluation criteria, 75% of the articles ( $n = 6$ ) met 75–100% of the MMAT checklist, representing high quality. Of the articles, 12.5% ( $n = 1$ ) met 50–75% of the evaluated criteria, representing moderate quality, while 12.5% of the articles ( $n = 1$ ) met less than 50% of the evaluated criteria, representing low quality.

### Background of the eligible studies

A total of eight studies were included in this systematic review, of which four were conducted in Vietnam, and 1 each in Indonesia, Malaysia, Thailand and the Philippines (Supplementary table). The themes covered by all studies included incidence rates, case numbers and risk

1  
2  
3 factors of rabies in Southeast Asia. Among the included studies, three studies particularly  
4  
5 discussed rabies mortality.  
6  
7  
8  
9

### 10 **Incidence and risk factors of rabies in Southeast Asian countries**

11  
12 Overall, the incidence of rabies ranged between 0.1 per 100,000 population in the Philippines  
13  
14 (28) 117.2 per 100,000 population in Vietnam [18]. The average monthly number of rabies  
15  
16 cases in Vietnam was 429 during the period from 2011 to 2015, with the incidence ranging  
17  
18 from 1.7 to 117.2 per 100,000, with higher incidences observed in the Red River, South Central  
19  
20 Coast (SCC) and Mekong River Delta (MRD) regions (29). Specific to Southern Vietnam, a total  
21  
22 of 94 human rabies cases were reported between 2009 and 2018, with an average of nine  
23  
24 cases recorded annually, representing an incidence of 2.7 cases per 10 million population (30).  
25  
26 The highest number was reported in 2018 (5.5 cases per 10 million population). Most cases  
27  
28 were among men and individuals aged 50 years and above.  
29  
30  
31  
32  
33

34  
35 Dog butchers in Vietnam were at high risk of rabies virus infection (31). The study  
36  
37 found that 28.3% of butchers were at risk of rabies exposure due to the slaughtering of sick  
38  
39 dogs and getting bites, scratches or knife cuts. Of 406 participants, 8.6% had sufficient levels  
40  
41 of rabies neutralising antibody (NTA) for protection and only 8.1% were vaccinated. In terms  
42  
43 of location, rabies cases were limited to specific areas. Hotspots were identified in southern  
44  
45 Vietnam, particularly in the MRD and SCC (32). Seasonal patterns were observed, with a  
46  
47 strong peak in February/July and a minor peak in October/December in the MRD region.  
48  
49 However, a strong peak was detected in the middle of each year in the SCC. Temperature,  
50  
51 humidity and cumulative rainfall are positively associated with an increased incidence of  
52  
53 rabies in Vietnam. In terms of socio-economic factors, increases in population density, as well  
54  
55 as the percentage of illiteracy, elevated the risk of rabies (29).  
56  
57  
58  
59  
60

1  
2  
3 In Indonesia, 104 human rabies cases were reported in Bali from November 2008 to  
4 November 2010. Most of the cases were among men. Almost all (92%) cases had a history of  
5 a dog bite. Only 5.8% had their wounds treated and received an anti-rabies vaccine (ARV)  
6 after the bite incident (33). Even worse, rabies cases in Sibu, Sarawak, also did not seek  
7 medical attention following a dog bite (34). The cumulative incidence in Sibu was estimated  
8 at 1.7 per 100,000 population. The incubation period varied from 17 days to 2 years.  
9  
10  
11  
12  
13  
14  
15  
16  
17

18 A total of 46 confirmed and probable cases of human rabies were reported in Thailand  
19 from 2010 to 2015, of which 11 were reported in Eastern Thailand (35). Even though rabies  
20 can be prevented by vaccination, more than 90% of rabies death cases in Thailand did not  
21 receive or improperly stopped receiving PEP. In terms of suspected rabies exposures, 6,204  
22 exposures were reported from eight provinces in Eastern Thailand, resulting in a crude  
23 exposure rate of 106 reported rabies exposures per 100,000 people. Dogs were the main  
24 source of exposure (77.8%), while children under the age of 15 and older persons over the  
25 age of 60 had the highest overall reported exposure rates (189.7 and 189.2/100,000,  
26 respectively).  
27  
28  
29  
30  
31  
32  
33  
34  
35  
36  
37  
38  
39

40 In the Philippines, there were 575 rabies cases from 2006 to 2015, of which 70% were  
41 among men. Nearly 34% of the patients were aged 41 to 60 years. The incidence rate of  
42 human rabies per 100,000 population in 2007, 2010 and 2015 was 0.1305, 0.1356 and 0.1708  
43 in the National Capital Region; 0.2890, 0.2965 and 0.1961 in Region III; and 0.1449, 0.1272  
44 and 0.1041 in Region IV-A, respectively (28).  
45  
46  
47  
48  
49  
50  
51  
52  
53  
54

### 55 **Rabies mortality in Southeast Asian countries**

56  
57 The case fatality rate was 100% as mentioned in two studies (33,34). Of the six deaths  
58 reported in Sibu, five patients succumbed to the illness within 2 weeks of symptom onset,  
59  
60

1  
2  
3 with five out of the six cases reporting a dog bite history [23]. In Indonesia, Susilawati et al.  
4 reported 104 fatalities due to rabies, of which 96 cases had a history of dog bites [22]. In the  
5  
6 Philippines, 463 people died from rabies infection (28).  
7  
8  
9

## 10 11 12 13 **DISCUSSION**

### 14 15 **Incidence and risk factors of rabies in Southeast Asian countries**

16  
17 Rabies in Asia and Africa contributes to over 99% of the human rabies deaths that occur in  
18 the world today. The vast majority (60%) of these deaths occur in Asia (36). Every year, an  
19 estimated 59,000 people die from rabies worldwide, with the majority (95%) of these deaths  
20 occurring in Africa and Asia due to a lack of PEP services for animal-bite patients and rabies  
21 surveillance personnel and facilities (37). These statistics support the results of our study,  
22 which shows the reporting of a high number of rabies cases in Vietnam, Indonesia and  
23 Thailand, which are endemic for rabies (38).  
24  
25  
26  
27  
28  
29  
30  
31  
32  
33

34  
35 Rabies is concentrated in Asia and Southeast Asia because it is frequently neglected  
36 when health and agriculture budgets are set, although the costs and economic benefits of  
37 implementing rabies prevention programs have been successfully established in high-income  
38 countries (39). The high number of rabies cases in Southeast Asia can also be attributed to  
39 the high number of unowned, free-roaming dogs that cannot be controlled without  
40 considerable effort and thus are not vaccinated (40). Vaccination programs for dogs can  
41 provide herd immunity and break the rabies transmission cycle in this reservoir species and  
42 have been successfully applied in several countries around the world (41).  
43  
44  
45  
46  
47  
48  
49  
50  
51  
52  
53

54  
55 Another cause of the high incidence of rabies in Southeast Asia is the working hazards  
56 of dog butchers, especially in countries that have legalised dog consumption, such as Vietnam  
57 (42). The Centers for Disease Control and Prevention (CDC) also reported the illegal trafficking  
58  
59  
60

1  
2  
3 of dogs for human consumption in Vietnam  
4  
5 ([https://www.cdc.gov/globalhealth/stories/rabies\\_southeast\\_asia.htm](https://www.cdc.gov/globalhealth/stories/rabies_southeast_asia.htm)), which could  
6  
7 possibly contribute to the high incidence of rabies in Vietnam. Professional dog butchers in  
8  
9 northern Vietnam are at a high risk of rabies virus infection due to exposure during the  
10  
11 slaughtering process from the handling of sick or dead dogs and getting bitten, scratched, or  
12  
13 cut with knives. A study reported that 91.9% of professional dog butchers in Vietnam were  
14  
15 not vaccinated against rabies, which may be because of fear of the side effects of the rabies  
16  
17 vaccine, inability to afford vaccination, and incorrect knowledge of rabies prevention (31).  
18  
19  
20  
21  
22

23 The rabies incidence of 0.1 per 100,000 population in the Philippines is similar to that  
24  
25 reported in China in 2016 (43). The lower rabies incidence in the Philippines compared to  
26  
27 other Southeast Asian countries may be due to the implementation of the Anti-Rabies Act of  
28  
29 2007 to prevent and control human rabies (44). Additionally, the consumption of dog meat  
30  
31 was banned in 1998 with the implementation of the Animal Welfare Act which may contribute  
32  
33 to the lower incidence of rabies in the Philippines (45).  
34  
35  
36

37 Men are more likely to contract rabies infection than women [19]. Similar findings  
38  
39 were reported in Iraq, where more than 89% of rabies cases were among men (46). This can  
40  
41 be attributed to the fact that most women are housewives, while men are engaged in outdoor  
42  
43 activities (47). Another study in Ethiopia also stated that men are more likely to perform  
44  
45 nightly and outdoor activities, while women are more likely to remain indoors for cultural and  
46  
47 religious reasons (48), which could explain the increased incidence of rabies in men.  
48  
49  
50

51 According to study a by Yurachai et al., rabies infection affects children more  
52  
53 compared to other age groups [24]. This corresponds to a WHO report, stating that 40% of  
54  
55 rabies victims are children ages 4 to 15 ([https://www.who.int/news-room/fact-](https://www.who.int/news-room/fact-sheets/detail/rabies)  
56  
57 [sheets/detail/rabies](https://www.who.int/news-room/fact-sheets/detail/rabies)). Other studies in Yemen and Iran reported similar findings, with nearly  
58  
59  
60



1  
2  
3 40% of the individuals exposed to rabies infection falling in this age group (46,49). Children in  
4  
5 this age group are probably more likely to play with, annoy or approach biting animals, which  
6  
7 contributes to the higher rate of bites in this age group (46). In contrast, according to a study  
8  
9 by Pham et al., older people are more likely to become infected with rabies [19].  
10  
11

12  
13 In several studies included in this systematic review, the diagnosis of most rabies cases  
14  
15 was based only on detailed history and clinical diagnosis [17, 19, 21]. To diagnose rabies in  
16  
17 humans, multiple samples such as saliva, serum, spinal fluid and skin biopsies of hair follicles  
18  
19 from the nape of the neck are analysed. Viral isolation or reverse transcription followed by  
20  
21 polymerase chain reaction (RT-PCR) can be used to analyse saliva. Serum and spinal fluid are  
22  
23 tested for rabies virus antibodies. Skin biopsies can be used to detect rabies antigens in the  
24  
25 cutaneous nerves at the base of the hair follicles  
26  
27 (<https://www.cdc.gov/rabies/diagnosis/animals-humans.html>). In the future, developing  
28  
29 countries need to standardise the diagnosis of rabies based on the laboratory tests mentioned  
30  
31 above for the accuracy of the diagnosis and to enable comparison with other studies in  
32  
33 developed countries.  
34  
35  
36  
37  
38

39  
40 Of the included studies, only one was conducted among butchers, who were at higher  
41  
42 risk of contracting rabies [20]. Apart from butchers, individuals working as veterinarians,  
43  
44 veterinary technicians, animal control workers, and wildlife rehabilitators were also  
45  
46 considered to have a higher risk of contracting rabies than the general population (50). This  
47  
48 calls for more studies incorporating individuals involved in occupations identified as high risk  
49  
50 for rabies exposure and infection.  
51  
52

53  
54 In this study, climate was postulated to be one of the risk factors for rabies infection.  
55  
56 This was echoed by a study in China showing that the incidence of rabies increases with the  
57  
58 ambient temperature. A warmer climate causes animals to be more active in their  
59  
60

1  
2  
3 environment and to travel greater distances when tracking, which contributes to the spread  
4 of rabies. In addition, as temperatures rise, people tend to wear lighter clothing and expose  
5 more skin, which increases the likelihood of being bitten by a dog (51). In South Korea, the  
6 seasonality of wildlife rabies was attributed to behaviours such as searching for food during  
7 the winter or early spring. Dogs may thus have more opportunities to come into contact with  
8 rabid animals during this period due to greater animal movement, which could contribute to  
9 seasonal patterns in the occurrence of rabies in humans (52).  
10  
11  
12  
13  
14  
15  
16  
17  
18  
19  
20  
21  
22

### 23 **Rabies mortality in Southeast Asian countries**

24  
25 In this study, rabies had a high fatality rate, with 100% of the infected cases dying. This is  
26 supported by a review in Africa by Nyasulu et al., who reported that Algeria, Namibia, Eswatini  
27 (formerly Swaziland), Tunisia, Uganda, Zambia, and Zimbabwe had high morbidity and  
28 mortality due to rabies, with 563 cases (33.9% deaths), 269 cases (94% deaths), 62 cases (88.7%  
29 deaths), 91 cases (90% deaths), 466 cases (40.9% deaths), 207 cases (32.8% deaths), and 114  
30 cases (80.7% deaths), respectively (53). Because of the large population of stray dogs in this  
31 area, the chances of being bitten by a dog are high. Not only are the chances of being bitten  
32 high in these areas, but access to treatment in a timely and adequate manner is also very  
33 limited. Rabies vaccines may not be routinely available in rural areas where most exposures  
34 occur, and rabies immunoglobulins, which are required for category III bites, are always in  
35 short supply (54).  
36  
37  
38  
39  
40  
41  
42  
43  
44  
45  
46  
47  
48  
49  
50

51  
52 These factors significantly contribute to the high mortality rate, as the highly  
53 protective rabies vaccine is frequently unavailable in these poor areas. In addition, the public  
54 is often unconcerned and unaware of the need for early treatment after being bitten by dogs  
55 (55). According to recent studies, many rabies victims contracted the disease owing to neglect,  
56  
57  
58  
59  
60

1  
2  
3 ignorance, or a lack of primary healthcare facilities (56). Thus, health promotion and  
4  
5 education should be given to the public as knowledge regarding rabies is essential to reduce  
6  
7 morbidity and mortality (5).  
8  
9

10  
11 In high-income countries such as the USA, the incidence of rabies and associated  
12  
13 mortality is low. In the last decade, there have been only 25 cases of human rabies reported  
14  
15 in the USA (2009–2018), with 23 deaths (6). The low number of cases of rabies infection is  
16  
17 due to successful animal control and vaccination programs, successful outreach programs,  
18  
19 public health capacity and laboratory diagnostics, and the availability of modern rabies  
20  
21 biologics (57). Even though rabies is preventable, the exorbitant cost of vaccinations,  
22  
23 combined with a lack of education and knowledge about the disease, limits PEP use. (56)  
24  
25  
26  
27  
28  
29

### 30 **Strengths and limitations**

31  
32 In this study, we only included research from Southeast Asia, which may not represent rabies  
33  
34 infection in other regions or continents. We did not include grey literature or national  
35  
36 guidelines, which could have been useful in this study. Nevertheless, the strength of this  
37  
38 review lies in its inclusion of studies that defined or diagnosed rabies based on either clinical  
39  
40 signs or laboratory testing. Given that rabies is often diagnosed clinically, especially in  
41  
42 developing countries (58), this process increased the chances of identifying rabies cases in  
43  
44 Southeast Asian countries.  
45  
46  
47  
48  
49  
50

### 51 **Recommendations**

52  
53 A successful rabies prevention and control program requires integrating and strengthening  
54  
55 intersectoral and transdisciplinary collaboration and cooperation among various societal  
56  
57 components (59). The Association of Southeast Asian Nations (ASEAN) Rabies Elimination  
58  
59  
60

1  
2  
3 Strategy places great value on the organisational and One Health frameworks for rabies  
4 eradication. The single most significant way to deal with rabies concerns is to eliminate dog-  
5 mediated rabies. The requirement for PEP is considerably reduced when dog rabies is  
6 eradicated (60). To benefit from the synergy and maximisation of shared resources,  
7 comprehensive rabies control programs should involve the combination of human, financial,  
8 and material resources with other disease programs (36).  
9  
10  
11  
12  
13  
14  
15  
16

17  
18 Mass canine vaccination campaigns will boost herd immunity and reduce the risk of  
19 human rabies exposure, but this will need strong governmental commitment and extensive  
20 social mobilisation. The veterinary authority's active engagement in animal rabies control at  
21 the national level is critical, and it is their social responsibility to prevent human rabies  
22 through well-planned dog rabies control programs (38). In 1983, the Pan American Health  
23 Organization initiated an elimination programme for human rabies transmitted by dogs that  
24 was mainly based on the mass immunisation of dogs; this has led to a 90% reduction in dog  
25 rabies in Chile and other Latin American countries (61).  
26  
27  
28  
29  
30  
31  
32  
33  
34  
35  
36

37 Rabies control and elimination in low endemic rabies countries such as Malaysia and  
38 Singapore have been made possible by the strict enforcement of dog registration, vaccination,  
39 and population management measures. Malaysia shares a border with Thailand, and the  
40 notion of an immunological belt has been developed through dog licensing, required  
41 vaccination of dogs and the systematic extermination of unvaccinated dogs in a buffer zone  
42 to prevent rabies from entering the country (38). Perhaps other middle and high endemic  
43 rabies countries could follow this rabies control strategy implemented by their Southeast  
44 Asian neighbour.  
45  
46  
47  
48  
49  
50  
51  
52  
53  
54  
55

56  
57 Public information and education are important to increase awareness and enhance  
58 community participation and support in rabies prevention programs. Dissemination of  
59  
60

1  
2  
3 important information such as the high fatality rate of rabies, its epidemiology, its prevention  
4 and control, and the disease control program, in general, is vital for program implementation  
5 and responsible pet ownership. By recognising rabies' influence on people's daily lives and  
6 the fact that dogs can be a source of human infection, community and school-based rabies  
7 prevention initiatives will be easier to establish (62).

8  
9  
10  
11  
12  
13  
14  
15 The involvement of stakeholders is crucial, and by bringing together key stakeholders  
16 from the corporate and public sectors, health security and the need to form public-private  
17 partnerships, which are critical in rabies prevention programs, can be addressed (63).  
18 National government agencies can maintain standardised approaches for rabies management  
19 and elimination and advocate on how to begin public-private cooperation to ensure long-  
20 term intervention. All stakeholders can benefit from such technical and administrative effort  
21 as they provide credibility and quality assurance to the prevention program's effectiveness  
22 (36). Various examples of public-private partnerships that aid in implementing public  
23 programs, research, and policy formation can be seen in Indonesia, India, Sri Lanka, the  
24 Philippines, Thailand, and Vietnam (3).

## 41 42 **CONCLUSION**

43  
44 Rabies has often been neglected and not given priority in terms of funding for prevention  
45 programs, resulting in the continued presence of rabies cases in Southeast Asia despite the  
46 endorsement of multiple programs by the WHO. The high number of unvaccinated stray and  
47 pet dogs, working hazards (dog butchers in Vietnam), unavailability of the rabies vaccine in  
48 rural areas, as well as ignorance regarding the importance of seeking treatment after dog  
49 bites, are among the factors that contribute to rabies cases in Southeast Asia.

### Author contributions

All authors, J.L.M.Y., A.F.N.A.H., D.A., N.R., M.R.H., S.S.S.A.R., M.S.J., A.O., and A.H. were involved in the conceptualisation, methodology, extensive search for articles, critical review of articles, synthesis of results and original draft write-up. M.R.H. supervised the manuscript preparation. All authors have read and agreed to the final draft of the manuscript.

### Funding

This research received no external funding.

### Competing interests

The authors declare no conflicts of interest.

### Patient consent for publication

Not applicable.

### Ethics approval

Not applicable.

### Data availability statement

Data are available upon reasonable request.

### Acknowledgements

We would like to thank the Department of Community Health, Faculty of Medicine, National University of Malaysia, for their technical support.

**Figure:** PRISMA 2020 flow diagram for new systematic reviews that included searches of databases

1. Devleesschauwer B, Aryal A, Sharma BK, Ale A, Declercq A, Depraz S, et al. Epidemiology, Impact and Control of Rabies in Nepal: A Systematic Review. *PLoS Negl Trop Dis*. 2016 Feb 12;10(2).
2. World Health Organization. WHO Fact Sheets: Rabies [Internet]. 2021 [cited 2022 Mar 21]. Available from: <https://www.who.int/news-room/fact-sheets/detail/rabies>
3. World Health Organization. WHO Expert Consultation on Rabies Second report. *World Health Organ Tech Rep Ser*. 2013;1–139.
4. Hampson K, Coudeville L, Lembo T, Sambo M, Kieffer A, Attlan M, et al. Estimating the Global Burden of Endemic Canine Rabies. *PLoS Negl Trop Dis*. 2015 Apr 16;9(4).
5. World Health Organization. WHO expert consultation on rabies: third report (Vol. 1012). 2018.
6. Center for Disease Control and Prevention. Rabies Status: Assessment by Country [Internet]. 2021 [cited 2022 Mar 21]. Available from: <https://www.cdc.gov/rabies/resources/countries-risk.html>
7. Navanithakumar B, Sohayati A, Rohaiza Y, Sarah D, Mariani H, Leonora T, et al. An Overview of Rabies Outbreaks in Malaysia, Ordinances and Laws. *Malays J Vet Res (Putrajaya)*. 2019;10(2):148–58.
8. Tenzin, Ward MP. Review of Rabies Epidemiology and Control in South, South East and East Asia: Past, Present and Prospects for Elimination. Vol. 59, *Zoonoses and Public Health*. 2012. p. 451–67.
9. Abela-Ridder B. Rabies: 100 per cent fatal, 100 per cent preventable. *Vet Rec*. 2015 Aug;177(6):148–9.
10. World Health Organization. Rabies vaccines:WHO position paper. *Weekly epidemiological record = Relevé épidémiologique hebdomadaire*. 2010;85(32):309–20.
11. John D, Royal A, Bharti O. Burden of illness of dog-mediated rabies in India: A systematic review. *Clin Epidemiol Glob Health*. 2021 Oct 1;12.
12. Alaifan T, Altamimi A. A Systematic Review of epidemiology of Rabies in Arab countries. *J Health Inform Dev Ctries*. 2019;13(2).
13. Page MJ, McKenzie JE, Bossuyt PM, Boutron I, Hoffmann TC, Mulrow CD, et al. The PRISMA 2020 statement: An updated guideline for reporting systematic reviews. *International Journal of Surgery*. 2021 Apr 1;88.
14. Munn Z, Stern C, Aromataris E, Lockwood C, Jordan Z. What kind of systematic review should i conduct? A proposed typology and guidance for systematic reviewers in the medical and health sciences. Vol. 18, *BMC Medical Research Methodology*. BioMed Central Ltd.; 2018.
15. Stern C, Al E, Sigurdson C, Middlet A, Kerr S, Lawrence M. Developing the Review Question and Inclusion Criteria Tobacco and alcohol-related interventions for people with mild/moderate intellectual disabilities: a sy.... *AJN The American Journal of Nursing*. 2014;114(4):53–6.

16. Hong QN, Fàbregues S, Bartlett G, Boardman F, Cargo M, Dagenais P, et al. The Mixed Methods Appraisal Tool (MMAT) version 2018 for information professionals and researchers. *Education for Information*. 2018;34(4):285–91.
17. Melyantono SE, Susetya H, Widayani P, Wayan Masa Tenaya I, Hartawan DHW. The rabies distribution pattern on dogs using average nearest neighbor analysis approach in the Karangasem District, Bali, Indonesia, in 2019. *Vet World*. 2021 Mar 1;14(3):614–24.
18. Lachica ZPT, Peralta JM, Diamante EO, Murao LAE, Mata MAE, Alviola PA. A cointegration analysis of rabies cases and weather components in Davao City, Philippines from 2006 to 2017. Vol. 15, *PLoS ONE*. Public Library of Science; 2020.
19. Tran CH, Afriyie DO, Pham TN, Otsu S, Urabe M, Dang AD, et al. Rabies post-exposure prophylaxis initiation and adherence among patients in Vietnam, 2014–2016. *Vaccine*. 2019 Oct 3;37:A54–63.
20. Lawpoolsri S, Kaewkungwal J, Khamsiriwatchara A, Sovann L, Sreng B, Phommasack B, et al. Data quality and timeliness of outbreak reporting system among countries in Greater Mekong subregion: Challenges for international data sharing. *PLoS Negl Trop Dis*. 2018 Apr 25;12(4).
21. Mu TT, Sein AA, Soe C, Aung NPP, Kyi TT, Hanson J. Rabies in Myanmar: Prevalent, preventable but not prioritized. *American Journal of Tropical Medicine and Hygiene*. 2017;97(4):989–91.
22. Ward MP. Rabies in the Dutch East Indies a century ago - A spatio-temporal case study in disease emergence. *Prev Vet Med*. 2014 Apr 1;114(1):11–20.
23. Hemachudha P, Hemachudha T. Rabies: Presentation, case management and therapy. *J Neurol Sci*. 2021 May 15;424.
24. Nguyen HTT, Tran CH, Dang AD, Tran HGT, Vu TD, Pham TN, et al. Rabies Vaccine Hesitancy and Deaths Among Pregnant and Breastfeeding Women - Vietnam, 2015–2016. *MMWR Morb Mortal Wkly Rep* [Internet]. 2018 Mar 2;67(8):250–2. Available from: <https://pubmed.ncbi.nlm.nih.gov/29494566>
25. Purwo Suseno P, Rysava K, Brum E, De Balogh K, Ketut Diarmita I, Fakhri Husein W, et al. Lessons for rabies control and elimination programmes: a decade of One Health experience from Bali, Indonesia. *Rev Sci Tech* [Internet]. 2019 May;38(1):213–24. Available from: <https://pubmed.ncbi.nlm.nih.gov/31564729>
26. Nguyen HTT, Afriyie DO, Tran CH, Dang AD, Tran DN, Dang TQ, et al. Progress towards rabies control and elimination in Vietnam. *Rev Sci Tech* [Internet]. 2019;38(1):199–212. Available from: <http://europepmc.org/abstract/MED/31564730>
27. Sim BNH, Liang BNW, Ning WS, Viswanathan S. A retrospective analysis of emerging rabies: A neglected tropical disease in sarawak, malaysia clinical. *Journal of the Royal College of Physicians of Edinburgh*. 2021;51(2):133–9.
28. Guzman FD, Iwamoto Y, Saito N, Salva EP, Dimaano EM, Nishizono A, et al. Clinical, epidemiological, and spatial features of human rabies cases in Metro Manila, the Philippines from 2006 to 2015. *PLoS Negl Trop Dis*. 2022 Jul 1;16(7).



- 1
  - 2
  - 3
  - 4
  - 5
  - 6
  - 7
  - 8
  - 9
  - 10
  - 11
  - 12
  - 13
  - 14
  - 15
  - 16
  - 17
  - 18
  - 19
  - 20
  - 21
  - 22
  - 23
  - 24
  - 25
  - 26
  - 27
  - 28
  - 29
  - 30
  - 31
  - 32
  - 33
  - 34
  - 35
  - 36
  - 37
  - 38
  - 39
  - 40
  - 41
  - 42
  - 43
  - 44
  - 45
  - 46
  - 47
  - 48
  - 49
  - 50
  - 51
  - 52
  - 53
  - 54
  - 55
  - 56
  - 57
  - 58
  - 59
  - 60
29. Phung D, Nguyen HX, Thi Nguyen HL, Luong AM, Do CM, Tran QD, et al. The effects of socioecological factors on variation of communicable diseases: A multiple-disease study at the national scale of Vietnam. *PLoS One*. 2018 Mar 1;13(3).
30. Pham QD, Phan LT, Nguyen TPT, Doan QMN, Nguyen HD, Luong QC, et al. An Evaluation of the Rabies Surveillance in Southern Vietnam. *Front Public Health*. 2021 Apr 29;9.
31. Nguyen AKT, Vu AH, Nguyen TT, Nguyen DV, Ngo GC, Pham TQ, et al. Risk Factors and Protective Immunity Against Rabies in Unvaccinated Butchers Working at Dog Slaughterhouses in Northern Vietnam. *Am J Trop Med Hyg*. 2021 Aug 2;
32. Lee HS, Thiem VD, Anh DD, Duong TN, Lee M, Grace D, et al. Geographical and temporal patterns of rabies post exposure prophylaxis (PEP) incidence in humans in the mekong river delta and southeast central coast regions in Vietnam from 2005 to 2015. Vol. 13, *PLoS ONE*. Public Library of Science; 2018.
33. Susilawathi NM, Darwinata AE, Dwija IBNP, Budayanti NS, Wirasandhi GAK, Subrata K, et al. Epidemiological and clinical features of human rabies cases in Bali 2008-2010. *BMC Infect Dis*. 2012 Apr 2;12.
34. Sim BNH, Liang BNW, Ning WS, Viswanathan S. A retrospective analysis of emerging rabies: A neglected tropical disease in sarawak, malaysia clinical. *Journal of the Royal College of Physicians of Edinburgh*. 2021;51(2):133–9.
35. Yurachai O, Hinjoy S, Wallace RM. An epidemiological study of suspected rabies exposures and adherence to rabies post-exposure prophylaxis in eastern thailand, 2015. *PLoS Negl Trop Dis*. 2020 Feb 1;14(2).
36. Miranda MEG, Miranda NLJ. Rabies prevention in Asia: Institutionalizing implementation capacities. In: *Rabies and Rabies Vaccines*. Springer, Cham; 2020. p. 103–16.
37. World Health Organization. Human rabies: 2016 updates and call for data. *Wkly Epidemiol Rec*. 2017;92(7):77–86.
38. Gongal G, Wright AE. Human Rabies in the WHO Southeast Asia Region: Forward Steps for Elimination. *Adv Prev Med*. 2011;2011:1–5.
39. Knobel DL, Cleaveland S, Coleman PG, Fèvre EM, Meltzer MI, Elizabeth M, et al. Re-evaluating the burden of rabies in Africa and Asia. *Bull World Health Organ*. 2005;83(5):360–8.
40. Chanachai K, Wongphruksasoong V, Vos A, Leelahapongsathon K, Tangwangvivat R, Sagarasaeranee O, et al. Feasibility and effectiveness studies with oral vaccination of free-roaming dogs against rabies in Thailand. *Viruses*. 2021 Apr 1;13(4).
41. Schneider MC, Belotto A, Adé MP, Hendrickx S, Leanes LF, de Rodrigues MJF, et al. Current Status of Human Rabies Transmitted by Dogs in Latin America. *Cad Saúde Pública*. 2007;23:2049–63.
42. Nguyen TT, Hoang VT, Nguyen TH. Epidemiology of rabies in Vietnam, 2009–2011. *J Prev Med (Wilmington)*. 2013;7:29–37.
43. Qi L, Su K, Shen T, Tang W, Xiao B, Long J, et al. Epidemiological characteristics and post-exposure prophylaxis of human rabies in Chongqing, China, 2007-2016. *BMC Infect Dis*. 2018 Jan 3;18(1).

- 1
  - 2
  - 3
  - 4
  - 5
  - 6
  - 7
  - 8
  - 9
  - 10
  - 11
  - 12
  - 13
  - 14
  - 15
  - 16
  - 17
  - 18
  - 19
  - 20
  - 21
  - 22
  - 23
  - 24
  - 25
  - 26
  - 27
  - 28
  - 29
  - 30
  - 31
  - 32
  - 33
  - 34
  - 35
  - 36
  - 37
  - 38
  - 39
  - 40
  - 41
  - 42
  - 43
  - 44
  - 45
  - 46
  - 47
  - 48
  - 49
  - 50
  - 51
  - 52
  - 53
  - 54
  - 55
  - 56
  - 57
  - 58
  - 59
  - 60
44. San Jose R, Magsino PJ, Bundalian R. Pet owners' awareness on RA 9482 (Anti-Rabies Act of 2007) in Magalang, Pampanga Philippines. *Heliyon*. 2019 May 1;5(5).
45. An Act to Promote Animal Welfare in the Philippines, Otherwise Known as "The Animal Welfare Act of 1998", Republic Act No. 8485.
46. Abdulmoghni RT, Al-Ward AH, Al-Moayed KA, AL-Amad MA, Khader YS. Incidence, trend, and mortality of human exposure to rabies in yemen, 2011-2017: Observational study. Vol. 7, *JMIR Public Health and Surveillance*. JMIR Publications Inc.; 2021.
47. Guadu T, Shite A, Chanie M, Bogale B, Fentahun T. Assessment of Knowledge, Attitude and Practices about Rabies and Associated Factors: In the Case of Bahir Dar Town. *Glob Vet*. 2014;13(3):348–54.
48. Yibrah M, Damtie D. Incidence of human rabies exposure and associated factors at the Gondar Health Center, Ethiopia: A three-year retrospective study. *Infect Dis Poverty*. 2015 Dec 12;4(1).
49. Horton DL, Ismail MZ, Siryan ES, Wali ARA, Ab-dulla HE, Wise E, et al. Rabies in Iraq: Trends in Human Cases 2001-2010 and Characterisation of Animal Rabies Strains from Baghdad. *PLoS Negl Trop Dis*. 2013;7(2).
50. Blanton JD, Colwell E, Walden CL, Davis LM, Hoang C, Legred JA, Pieracci EG, Wallace RM, Ebell MH, Fu ZF, Shwiff SA. Rabies exposures and pre-exposure vaccination practices among individuals with an increased risk of rabies exposure in the United States. *Journal of the American Veterinary Medical Association*. 2018 Jun 15;252(12):1491-502.
51. Guo D, Yin W, Yu H, Thill JC, Yang W, Chen F, et al. The role of socioeconomic and climatic factors in the spatio-temporal variation of human rabies in China. *BMC Infect Dis*. 2018 Oct 22;18(1).
52. Kim CH, Lee CG, Yoon HC, Nam HM, Park CK, Lee JC, Kang MI, Wee SH. Rabies, an emerging disease in Korea. *Journal of Veterinary Medicine, Series B*. 2006 Apr;53(3):111-5.
53. Nyasulu PS, Weyer J, Tschopp R, Mihret A, Aseffa A, Nuvor SV, et al. Rabies mortality and morbidity associated with animal bites in Africa: A case for integrated rabies disease surveillance, prevention and control: A scoping review. Vol. 11, *BMJ Open*. BMJ Publishing Group; 2021.
54. Acharya KP, Subedi D, Wilson RT. Rabies control in South Asia requires a One Health approach. *One Health*. 2021 Jun 1;12(100215).
55. Liu Q, Wang X, Liu B, Gong Y, Mkandawire N, Li W, et al. Improper wound treatment and delay of rabies post-exposure prophylaxis of animal bite victims in China: Prevalence and determinants. *PLoS Negl Trop Dis*. 2017 Jul 10;11(7).
56. World Health Organization. Rabies vaccines WHO Position Paper. *Weekly Epidemiological Record = Relevé épidémiologique hebdomadaire*. 2007;82(49–50):425–36.
57. Center for Disease Control and Prevention. Human Rabies [Internet]. 2021 [cited 2022 Mar 21]. Available from: [https://www.cdc.gov/rabies/location/usa/surveillance/human\\_rabies.html](https://www.cdc.gov/rabies/location/usa/surveillance/human_rabies.html)

- 1  
2  
3 58. Banyard AC, Horton DL, Freuling C, Müller T, Fooks AR. Control and prevention of canine  
4 rabies: The need for building laboratory-based surveillance capacity. Vol. 98, Antiviral  
5 Research. 2013. p. 357–64.  
6  
7 59. Léchenne M, Miranda ME, Zinsstag J., Schelling E, Waltner-Toews D, Whittaker M. Integrated  
8 rabies control. In: One Health: the theory and practice of integrated health approaches. CAB  
9 International; 2015. p. 176–89.  
10  
11 60. OIE SRR-SEA. OIE World Organisation for Animal Health, OIE Sub-Regional Representation for  
12 South-East Asia (OIE SRR-SEA): ASEAN rabies elimination strategy. 2016 Dec.  
13  
14 61. Belotto A, Leanes LF, Schneider MC, Tamayo H, Correa E. Overview of rabies in the Americas.  
15 Virus Res. 2005 Jul 1;111(1):5–12.  
16  
17 62. Birhane MG, Elizabeth Miranda MG, Dyer JL, Blanton JD, Recuenco S. Willingness to Pay for  
18 Dog Rabies Vaccine and Registration in Ilocos Norte, Philippines. PLoS Negl Trop Dis.  
19 2012;10(3).  
20  
21 63. Lembo T, Attlan M, Bourhy H, Cleaveland S, Costa P, de Balogh K, et al. Renewed global  
22 partnerships and redesigned roadmaps for rabies prevention and control. Vol. 2011,  
23 Veterinary Medicine International. 2011.  
24  
25  
26  
27  
28  
29  
30  
31  
32  
33  
34  
35  
36  
37  
38  
39  
40  
41  
42  
43  
44  
45  
46  
47  
48  
49  
50  
51  
52  
53  
54  
55  
56  
57  
58  
59  
60

PRISMA 2020 flow diagram for new systematic reviews which included searches of databases and registers only

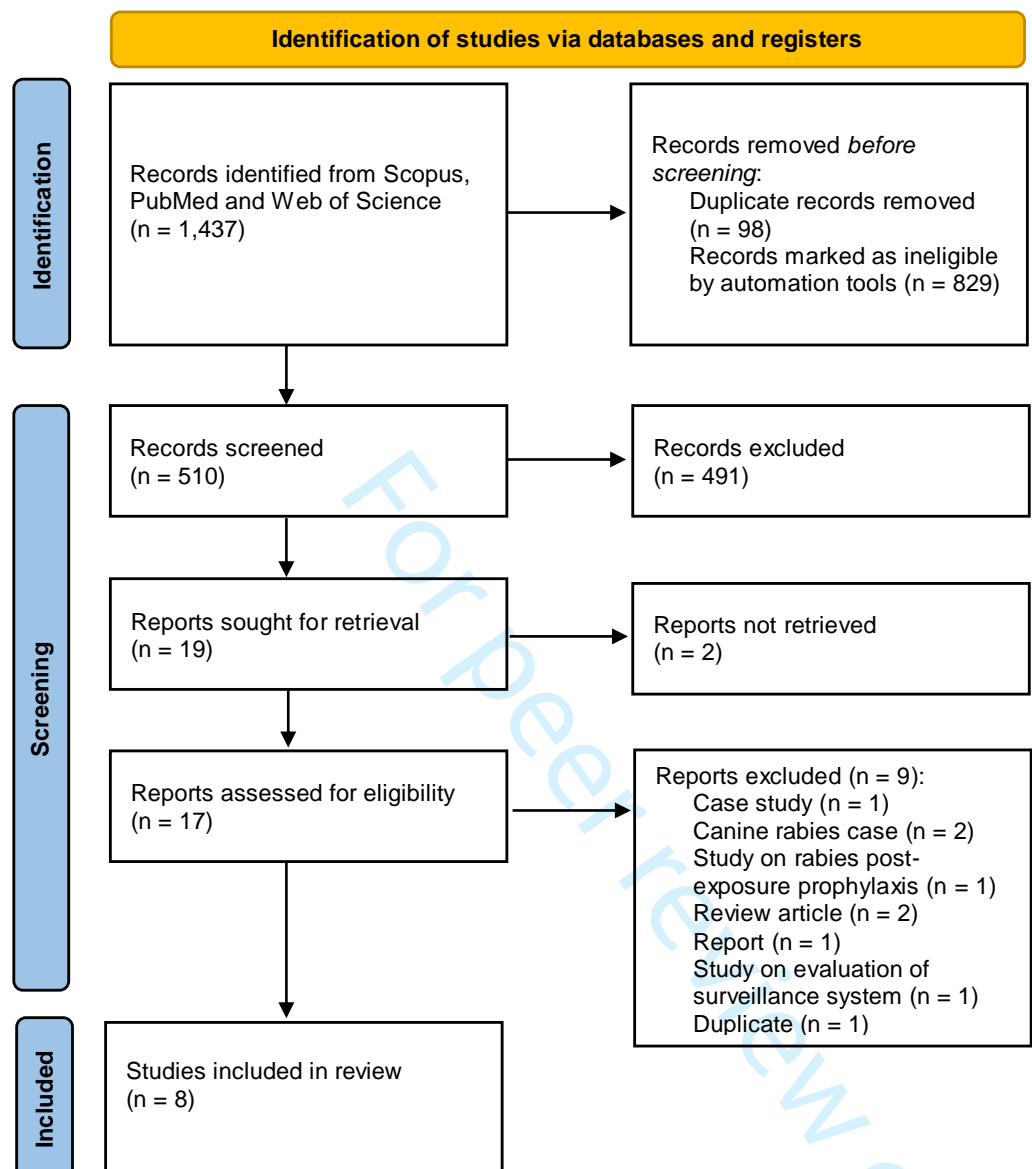

1  
2  
3  
4  
5  
6  
7  
8  
9  
10  
11  
12  
13  
14  
15  
16  
17  
18  
19  
20  
21  
22  
23  
24  
25  
26  
27  
28  
29  
30  
31  
32  
33  
34  
35  
36  
37  
38  
39  
40  
41  
42  
43  
44  
45  
46

Supplementary table: Table of evidence

| Author/year        | Country  | Reference                                                                                                                                                                                                                                                                                                                                        | Study design    | Statistical analysis                                    | Result                                                                                                                                                                                                                                                                                                 |
|--------------------|----------|--------------------------------------------------------------------------------------------------------------------------------------------------------------------------------------------------------------------------------------------------------------------------------------------------------------------------------------------------|-----------------|---------------------------------------------------------|--------------------------------------------------------------------------------------------------------------------------------------------------------------------------------------------------------------------------------------------------------------------------------------------------------|
| Nguyen et al. 2021 | Vietnam  | Nguyen, A. K. T., Vu, A. H., Nguyen, T. T., Nguyen, D. V., Ngo, G. C., Pham, T. Q., Inoue, S., et al. 2021. Risk factors and protective immunity against rabies in unvaccinated butchers working at dog slaughterhouses in Northern Vietnam. <i>American Journal of Tropical Medicine and Hygiene</i> 105(3): 788–793. doi:10.4269/ajtmh.20-1172 | Cross-sectional | Pearson correlation<br>Multivariate regression analysis | Study found that 28.3% of butchers were at risk of rabies exposure due to slaughtering sick dog, getting bitten, scratched or knife cut. Only 8.6% had NTA sufficient for protection and only 8.1% of them were vaccinated. Hence dog butchers in Vietnam were at high risk of rabies virus infection. |
| Pham et al. 2021   | Vietnam  | Pham, Q. D., Phan, L. T., Nguyen, T. P. T., Doan, Q. M. N., Nguyen, H. D., Luong, Q. C. & Nguyen, T. V. 2021. An Evaluation of the Rabies Surveillance in Southern Vietnam. <i>Frontiers in Public Health</i> 9(April): 1–9. doi:10.3389/fpubh.2021.610905                                                                                       | Cross-sectional | Descriptive<br>Chi-square test / Fisher’s exact test    | 94 human rabies cases (2009-2018) were reported in Southern Vietnam, with an average of nine cases recorded annually (2.7 cases per 10 million population). The highest number was reported in 2018. Majority of cases were male and those aged 50 years and above.                                    |
| Sim et al. 2021    | Malaysia | Sim, B. N. H., Liang, B. N. W., Ning, W. S. & Viswanathan, S. 2021. A retrospective analysis of emerging rabies: A neglected tropical disease in Sarawak, Malaysia. <i>Journal of the</i>                                                                                                                                                        | Cross-sectional | Descriptive                                             | 6 cases were identified with a mixture of MN and LMN findings. Most cases did not seek medical attention upon dog bite. The incubation period varied from 17 days to 2 years. All cases died, with 5 cases succumbing to the illness within 2 weeks of symptoms onset. The cumulative                  |

|                        |           |                                                                                                                                                                                                                                                                                                             |                 |                                                                                                               |                                                                                                                                                                                                                                                                                                                                                                                                                                                                                               |
|------------------------|-----------|-------------------------------------------------------------------------------------------------------------------------------------------------------------------------------------------------------------------------------------------------------------------------------------------------------------|-----------------|---------------------------------------------------------------------------------------------------------------|-----------------------------------------------------------------------------------------------------------------------------------------------------------------------------------------------------------------------------------------------------------------------------------------------------------------------------------------------------------------------------------------------------------------------------------------------------------------------------------------------|
|                        |           | <i>Royal College of Physicians of Edinburgh</i> 51(2): 133–139.<br>doi:10.4997/JRCPE.2021.207                                                                                                                                                                                                               |                 |                                                                                                               | incidence in Sibuh was estimated at 1.7 per 100,000 population.                                                                                                                                                                                                                                                                                                                                                                                                                               |
| Yurachai et al. 2021   | Thailand  | Yurachai, O., Hinjoy, S. & Wallace, R. M. 2020. An epidemiological study of suspected rabies exposures and adherence to rabies post-exposure prophylaxis in Eastern Thailand, 2015. <i>PLoS Neglected Tropical Diseases</i> 14(2): 1–17.<br>doi:10.1371/journal.pntd.0007248                                | Cross-sectional | Descriptive                                                                                                   | 46 confirmed and probable cases of human rabies were reported in Thailand (2010 – 2015). 11 were reported from Eastern Thailand. 6,204 suspected rabies exposure reported in 8 Eastern Thailand. Children age < 15 years and elderly age > 60 years had the highest suspected reported exposure rate compared to others (189.7/100,000 and 189.2/100,000). Overall, the estimated suspected rabies exposure rate was 204/100,000.                                                             |
| Phung et al. 2018      | Vietnam   | Phung, D., Nguyen, H. X., Thi Nguyen, H. L., Luong, A. M., Do, C. M., Tran, Q. D. & Chu, C. 2018. The effects of socioecological factors on variation of communicable diseases: A multiple-disease study at the national scale of Vietnam. <i>PLoS ONE</i> 13(3): 1–14.<br>doi:10.1371/journal.pone.0193246 | Ecological      | Moran's I tests<br>Multilevel negative binomial regression model / zero-inflated negative binomial regression | The average monthly number of rabies cases is 429 from 2011 to 2015. The incidences of rabies ranged from 1.7 to 117.2 per 100,000 with higher incidences observed in Red River, South Central Coast (SCC), and the Mekong Delta regions<br><br>Climate factors: temperature, humidity and cumulative rainfall were associated with increase in rabies incidence in Vietnam.<br><br>Socio-economic factors: population density and illiteracy were sensitive factor increased risk of rabies. |
| Susilawati et al. 2012 | Indonesia | Susilawathi, N. M., Darwinata, A. E., Dwija, I. B. N. P., Budayanti, N. S., Wirasandhi, G. A. K., Subrata, K.,                                                                                                                                                                                              | Cross-sectional | Descriptive                                                                                                   | 104 human rabies cases reported in Bali during November 2008–November 2010 which all are fatal and the symptom exhibit by all patients. Almost all (92%) cases had a history                                                                                                                                                                                                                                                                                                                  |

|                   |             |                                                                                                                                                                                                                                                                                                                                                              |                 |                                         |                                                                                                                                                                                                                                                                                                                                                                                                        |
|-------------------|-------------|--------------------------------------------------------------------------------------------------------------------------------------------------------------------------------------------------------------------------------------------------------------------------------------------------------------------------------------------------------------|-----------------|-----------------------------------------|--------------------------------------------------------------------------------------------------------------------------------------------------------------------------------------------------------------------------------------------------------------------------------------------------------------------------------------------------------------------------------------------------------|
|                   |             | Susilarini, N. K., et al. 2012. Epidemiological and clinical features of human rabies cases in Bali 2008-2010. <i>BMC Infectious Diseases</i> 12(November 2008): 0–7. Doi:10.1186/1471-2334-12-81                                                                                                                                                            |                 |                                         | of dog bite. Only 5.8% had their wounds treated and received an anti-rabies vaccine (ARV) after the bite incident. The case-fatality rate was 100%.                                                                                                                                                                                                                                                    |
| Lee et al. 2017   | Vietnam     | Lee, H. S., Thiem, V. D., Anh, D. D., Duong, T. N., Lee, M., Grace, D. & Nguyen-Viet, H. 2018. Geographical and temporal patterns of rabies post exposure prophylaxis (PEP) incidence in humans in the Mekong River Delta and Southeast Central Coast regions in Vietnam from 2005 to 2015. <i>PloS ONE</i> 13(4): 1–12. Doi:10.1371/journal.pone.0194943    | Ecological      | Univariate negative binomial regression | Hotspot localities were identified in Southern Vietnam (mainly at Mekong River Delta and South-Central Coast)<br><br>MRD: strong peak in February / July<br><br>SCC: middle of the year                                                                                                                                                                                                                |
| Guzman et al.2021 | Philippines | Guzman FD, Iwamoto Y, Saito N, Salva EP, Dimaano EM, Nishizono A, et al. (2022) Clinical, epidemiological, and spatial features of human rabies cases in Metro Manila, the Philippines from 2006 to 2015. <i>PLoS Negl Trop Dis</i> 16(7): e0010595. <a href="https://doi.org/10.1371/journal.pntd.0010595">https://doi.org/10.1371/journal.pntd.0010595</a> | Cross-sectional | Descriptive                             | 575 rabies cases from 2006 to 2015. Most patients were male (70.3%) and aged 41 to 60 years (34.1%).<br><br>The incidence rate of human rabies per 100,000 population in 2007, 2010, and 2015 were 0.1305, 0.1356, and 0.1708 in the National Capital Region; 0.2890, 0.2965, and 0.1961 in Region III; and 0.1449, 0.1272, and 0.1041 in Region IV-A, respectively.<br><br>463 people died of rabies. |

1  
2  
3  
4  
5  
6  
7  
8  
9  
10  
11  
12  
13  
14  
15  
16  
17  
18  
19  
20  
21  
22  
23  
24  
25  
26  
27  
28  
29  
30  
31  
32  
33  
34  
35  
36  
37  
38  
39  
40  
41  
42  
43  
44  
45  
46

1  
2  
3  
4  
5  
6  
7  
8  
9  
10  
11  
12  
13  
14  
15  
16  
17  
18  
19  
20  
21  
22  
23  
24  
25  
26  
27  
28  
29  
30  
31  
32  
33  
34  
35  
36  
37  
38  
39  
40  
41  
42  
43  
44  
45  
46

For peer review only



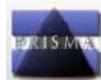

## PRISMA 2020 Checklist

| Section and Topic             | Item # | Checklist item                                                                                                                                                                                                                                                                                       | Location where item is reported |
|-------------------------------|--------|------------------------------------------------------------------------------------------------------------------------------------------------------------------------------------------------------------------------------------------------------------------------------------------------------|---------------------------------|
| <b>TITLE</b>                  |        |                                                                                                                                                                                                                                                                                                      |                                 |
| Title                         | 1      | Identify the report as a systematic review.                                                                                                                                                                                                                                                          | 1                               |
| <b>ABSTRACT</b>               |        |                                                                                                                                                                                                                                                                                                      |                                 |
| Abstract                      | 2      | See the PRISMA 2020 for Abstracts checklist.                                                                                                                                                                                                                                                         | 1 - 2                           |
| <b>INTRODUCTION</b>           |        |                                                                                                                                                                                                                                                                                                      |                                 |
| Rationale                     | 3      | Describe the rationale for the review in the context of existing knowledge.                                                                                                                                                                                                                          | 4 - 5                           |
| Objectives                    | 4      | Provide an explicit statement of the objective(s) or question(s) the review addresses.                                                                                                                                                                                                               | 5                               |
| <b>METHODS</b>                |        |                                                                                                                                                                                                                                                                                                      |                                 |
| Eligibility criteria          | 5      | Specify the inclusion and exclusion criteria for the review and how studies were grouped for the syntheses.                                                                                                                                                                                          | 8                               |
| Information sources           | 6      | Specify all databases, registers, websites, organisations, reference lists and other sources searched or consulted to identify studies. Specify the date when each source was last searched or consulted.                                                                                            | 7                               |
| Search strategy               | 7      | Present the full search strategies for all databases, registers, and websites, including any filters and limits used.                                                                                                                                                                                | 7 – 8                           |
| Selection process             | 8      | Specify the methods used to decide whether a study met the inclusion criteria of the review, including how many reviewers screened each record and each report retrieved, whether they worked independently, and if applicable, details of automation tools used in the process.                     | 8 – 9                           |
| Data collection process       | 9      | Specify the methods used to collect data from reports, including how many reviewers collected data from each report, whether they worked independently, any processes for obtaining or confirming data from study investigators, and if applicable, details of automation tools used in the process. | 8 – 9                           |
| Data items                    | 10a    | List and define all outcomes for which data were sought. Specify whether all results that were compatible with each outcome domain in each study were sought (e.g. for all measures, time points, analyses), and if not, the methods used to decide which results to collect.                        | 9                               |
|                               | 10b    | List and define all other variables for which data were sought (e.g. participant and intervention characteristics, funding sources). Describe any assumptions made about any missing or unclear information.                                                                                         | -                               |
| Study risk of bias assessment | 11     | Specify the methods used to assess risk of bias in the included studies, including details of the tool(s) used, how many reviewers assessed each study and whether they worked independently, and if applicable, details of automation tools used in the process.                                    | 9                               |
| Effect measures               | 12     | Specify for each outcome the effect measure(s) (e.g. risk ratio, mean difference) used in the synthesis or presentation of results.                                                                                                                                                                  | -                               |
| Synthesis methods             | 13a    | Describe the processes used to decide which studies were eligible for each synthesis (e.g. tabulating the study intervention characteristics and comparing against the planned groups for each synthesis (item #5)).                                                                                 | 9                               |
|                               | 13b    | Describe any methods required to prepare the data for presentation or synthesis, such as handling of missing summary statistics, or data conversions.                                                                                                                                                | 9                               |
|                               | 13c    | Describe any methods used to tabulate or visually display results of individual studies and syntheses.                                                                                                                                                                                               | 9                               |
|                               | 13d    | Describe any methods used to synthesize results and provide a rationale for the choice(s). If meta-analysis was performed, describe the model(s), method(s) to identify the presence and extent of statistical heterogeneity, and software package(s) used.                                          | 9                               |
|                               | 13e    | Describe any methods used to explore possible causes of heterogeneity among study results (e.g. subgroup analysis, meta-regression).                                                                                                                                                                 | -                               |
|                               | 13f    | Describe any sensitivity analyses conducted to assess robustness of the synthesized results.                                                                                                                                                                                                         | -                               |
| Reporting bias assessment     | 14     | Describe any methods used to assess risk of bias due to missing results in a synthesis (arising from reporting biases).                                                                                                                                                                              | -                               |
| Certainty                     | 15     | Describe any methods used to assess certainty (or confidence) in the body of evidence for an outcome.                                                                                                                                                                                                | 9                               |

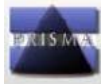

## PRISMA 2020 Checklist

| Section and Topic                              | Item # | Checklist item                                                                                                                                                                                                                                                                       | Location where item is reported |
|------------------------------------------------|--------|--------------------------------------------------------------------------------------------------------------------------------------------------------------------------------------------------------------------------------------------------------------------------------------|---------------------------------|
| assessment                                     |        |                                                                                                                                                                                                                                                                                      |                                 |
| <b>RESULTS</b>                                 |        |                                                                                                                                                                                                                                                                                      |                                 |
| Study selection                                | 16a    | Describe the results of the search and selection process, from the number of records identified in the search to the number of studies included in the review, ideally using a flow diagram.                                                                                         | 11                              |
|                                                | 16b    | Cite studies that might appear to meet the inclusion criteria, but which were excluded, and explain why they were excluded.                                                                                                                                                          | 11                              |
| Study characteristics                          | 17     | Cite each included study and present its characteristics.                                                                                                                                                                                                                            | 12 - 14                         |
| Risk of bias in studies                        | 18     | Present assessments of risk of bias for each included study.                                                                                                                                                                                                                         | 10                              |
| Results of individual studies                  | 19     | For all outcomes, present, for each study: (a) summary statistics for each group (where appropriate) and (b) an effect estimate and its precision (e.g. confidence/credible interval), ideally using structured tables or plots.                                                     | 12 - 14                         |
| Results of syntheses                           | 20a    | For each synthesis, briefly summarise the characteristics and risk of bias among contributing studies.                                                                                                                                                                               | 15 - 16                         |
|                                                | 20b    | Present results of all statistical syntheses conducted. If meta-analysis was done, present for each the summary estimate and its precision (e.g. confidence/credible interval) and measures of statistical heterogeneity. If comparing groups, describe the direction of the effect. | -                               |
|                                                | 20c    | Present results of all investigations of possible causes of heterogeneity among study results.                                                                                                                                                                                       | -                               |
|                                                | 20d    | Present results of all sensitivity analyses conducted to assess the robustness of the synthesized results.                                                                                                                                                                           | -                               |
| Reporting biases                               | 21     | Present assessments of risk of bias due to missing results (arising from reporting biases) for each synthesis assessed.                                                                                                                                                              | -                               |
| Certainty of evidence                          | 22     | Present assessments of certainty (or confidence) in the body of evidence for each outcome assessed.                                                                                                                                                                                  | -                               |
| <b>DISCUSSION</b>                              |        |                                                                                                                                                                                                                                                                                      |                                 |
| Discussion                                     | 23a    | Provide a general interpretation of the results in the context of other evidence.                                                                                                                                                                                                    | 17 - 21                         |
|                                                | 23b    | Discuss any limitations of the evidence included in the review.                                                                                                                                                                                                                      | 19                              |
|                                                | 23c    | Discuss any limitations of the review processes used.                                                                                                                                                                                                                                | 21                              |
|                                                | 23d    | Discuss implications of the results for practice, policy, and future research.                                                                                                                                                                                                       | 21 - 23                         |
| <b>OTHER INFORMATION</b>                       |        |                                                                                                                                                                                                                                                                                      |                                 |
| Registration and protocol                      | 24a    | Provide registration information for the review, including register name and registration number, or state that the review was not registered.                                                                                                                                       | 6                               |
|                                                | 24b    | Indicate where the review protocol can be accessed, or state that a protocol was not prepared.                                                                                                                                                                                       | 6                               |
|                                                | 24c    | Describe and explain any amendments to information provided at registration or in the protocol.                                                                                                                                                                                      | -                               |
| Support                                        | 25     | Describe sources of financial or non-financial support for the review, and the role of the funders or sponsors in the review.                                                                                                                                                        | 24                              |
| Competing interests                            | 26     | Declare any competing interests of review authors.                                                                                                                                                                                                                                   | 24                              |
| Availability of data, code and other materials | 27     | Report which of the following are publicly available and where they can be found: template data collection forms; data extracted from included studies; data used for all analyses; analytic code; any other materials used in the review.                                           | 24                              |

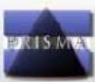

**PRISMA 2020 Checklist**

1  
2  
3  
4  
5  
6  
7  
8  
9  
10  
11  
12  
13  
14  
15  
16  
17  
18  
19  
20  
21  
22  
23  
24  
25  
26  
27  
28  
29  
30  
31  
32  
33  
34  
35  
36  
37  
38  
39  
40  
41  
42  
43  
44  
45  
46  
47

*From:* Page MJ, McKenzie JE, Bossuyt PM, Boutron I, Hoffmann TC, Mulrow CD, et al. The PRISMA 2020 statement: an updated guideline for reporting systematic reviews. *BMJ* 2021;372:n71. doi: 10.1136/bmj.n71

For more information, visit: <http://www.prisma-statement.org/>

For peer review only
